# Supplementary material for: History of labour market attachment as a determinant of health status: a 12-year follow-up of the Northern Swedish Cohort
Source: PubMed Central journal article supplement — BMJ Open. 2014 Feb 14;4(2):e004053. doi: 10.1136/bmjopen-2013-004053 (PMC3927714; doi:10.1136/bmjopen-2013-004053), 2014-02-14
Supplement: bmjopen-2013-004053.draft_revisions.pdf [file bmjopen-2013-004053.draft_revisions.pdf]

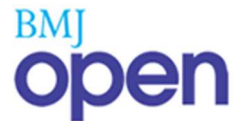

**Are changes in labour market attachment over 12 years  
related to health status?  
An analysis of the Northern Swedish Cohort**

|                                                                                                                                                                                           |                                                                                                                                                                                                                                                                                                                                                     |
|-------------------------------------------------------------------------------------------------------------------------------------------------------------------------------------------|-----------------------------------------------------------------------------------------------------------------------------------------------------------------------------------------------------------------------------------------------------------------------------------------------------------------------------------------------------|
| Journal:                                                                                                                                                                                  | <i>BMJ Open</i>                                                                                                                                                                                                                                                                                                                                     |
| Manuscript ID:                                                                                                                                                                            | bmjopen-2013-004053                                                                                                                                                                                                                                                                                                                                 |
| Article Type:                                                                                                                                                                             | Research                                                                                                                                                                                                                                                                                                                                            |
| Date Submitted by the Author:                                                                                                                                                             | 18-Sep-2013                                                                                                                                                                                                                                                                                                                                         |
| Complete List of Authors:                                                                                                                                                                 | Waenerlund, Anna-Karin; Umeå University, Public Health and Clinical Medicine<br>Gustafsson, Per; Umeå University, Public Health and Clinical Medicine<br>Hammarström, Anne; Umeå University, Public Health and Clinical Medicine<br>Virtanen, Pekka; University of Tampere, School of Health Sciences and<br>Institute for Advanced Social Research |
| <b>Primary Subject<br>Heading</b>:                                                                                                                                                        | Occupational and environmental medicine                                                                                                                                                                                                                                                                                                             |
| Secondary Subject Heading:                                                                                                                                                                | Epidemiology, Occupational and environmental medicine, Public health                                                                                                                                                                                                                                                                                |
| Keywords:                                                                                                                                                                                 | EPIDEMIOLOGY, OCCUPATIONAL & INDUSTRIAL MEDICINE, PUBLIC HEALTH                                                                                                                                                                                                                                                                                     |
| <p>Note: The following files were submitted by the author for peer review, but cannot be converted to PDF. You must view these files (e.g. movies) online.</p> <p>Figure 1 600dpi.xcf</p> |                                                                                                                                                                                                                                                                                                                                                     |

1  
2  
3  
4  
5 **Are changes in labour market attachment over 12 years related to health**  
6 **status?**  
7

8  
9 **An analysis of the Northern Swedish Cohort**  
10  
11

12  
13  
14  
15 ANNA-KARIN WAENERLUND<sup>1</sup>, PER E GUSTAFSSON<sup>1</sup>, ANNE HAMMARSTRÖM<sup>1</sup>,  
16 PEKKA VIRTANEN<sup>2,3</sup>  
17  
18  
19

20  
21  
22  
23  
24 <sup>1</sup>Department of Public Health and Clinical Medicine, Family Medicine, Umeå University,  
25 Umeå, Sweden.  
26  
27

28  
29 <sup>2</sup>School of Health Sciences and Institute for Advanced Social Research, University of  
30 Tampere, Finland.  
31  
32

33  
34 <sup>3</sup> Department of Public Health and Clinical Medicine, Epidemiology and Global Health,  
35 Umeå University, Umeå, Sweden.  
36  
37  
38

39  
40  
41  
42 Correspondence: Anna-Karin Waenerlund, Department of Public Health and Clinical  
43 Medicine, Umeå University, SE-901 85, Umeå, Sweden. Telephone: +46 90 785 35 81. Fax  
44 number: +46 90 77 68 83  
45  
46  
47

48  
49  
50 E-mail address: [annakarin.waenerlund@fammed.umu.se](mailto:annakarin.waenerlund@fammed.umu.se)  
51

52  
53 Word count: 3407  
54  
55  
56  
57  
58  
59  
60

1  
2  
3 Keywords: public health, psychological distress, employment, cohort, health, trajectory  
4  
5 analysis.  
6  
7

## 8 ABSTRACT

9  
10 Objective: The present study aims at using trajectory analysis to measure labour  
11 market attachment (LMA) over 12 years and at examining whether labour market  
12 tracks relate to perceived health status.  
13  
14

15 Design: Data were retrieved from a 26-year prospective cohort study, the Northern  
16 Swedish Cohort.  
17  
18

19 Setting and participants: All 9th grade students (n=1083) within the municipality of  
20 Luleå in northern Sweden were included in the baseline investigation in 1981. The  
21 vast majority (94%) of the original cohort participated at the fourth follow-up. In this  
22 study, 969 participants were included.  
23  
24

25 Measures: Perceived health status (psychological distress and non-optimal self-rated  
26 health) at age 42 and the data obtained from questionnaires.  
27  
28

29 Results: We have identified four tracks in relation to LMA across the 12-year period:  
30 'permanent', 'high level', 'strengthening' and 'poor level' of attachment. LMA history  
31 relates to psychological distress. High level (OR 1.55 (1.06-2.27)), strengthening (OR  
32 1.95 (1.29-2.93)) and poor attachment (OR 3.14 (2.10-4.70)) involve higher OR for  
33 psychological distress compared to permanent attachment. The overall p-value  
34 remained significant in the final model (0.001). Analyses regarding non-optimal self-  
35 rated health displayed a similar pattern but this was not significant in the final model.  
36  
37

38 Conclusions: Our results suggest that health status in mid-life, particularly  
39 psychological distress, is related to patterns of LMA history, to a large part  
40 independently of other social risk factors and previous health. Consideration of  
41  
42  
43  
44  
45  
46  
47  
48  
49

1  
2  
3 heterogeneity and time in labour market attachment might be important when  
4  
5 analysing associations with perceived health.  
6  
7

#### 8 Main strengths

9

- 10 • Using longitudinal data with exceptionally high response-rate
- 11
- 12 • Applying trajectory analysis which only has previously been sparsely used in this field
- 13
- 14 • Provides a uniquely rich and detailed data on temporary contracts over a long period
- 15
- 16 of time
- 17
- 18
- 19

#### 20 Limitations

21

- 22 • Relies on self-reported data
- 23
- 24 • Used a relatively small sample
- 25
- 26
- 27
- 28
- 29
- 30
- 31

## 32 INTRODUCTION

33

34  
35 During the last three decades or so, demands for a more flexible workforce have increased all  
36  
37 over the world. Flexibility in the labour market is reflected, for example, in the proportion of  
38  
39 temporary employees, which in recent years has varied between 13 and 15% of the total  
40  
41 working population in Europe.[1] Flexibility means that attachment to a workplace is weak  
42  
43 and commonly interrupted by unemployment and other episodes out of work. In order to  
44  
45 capture the total spectrum of employment relations – from being permanently employed  
46  
47 through various non-permanent posts and unemployment, to those who are exempted from  
48  
49 working – the concept of ‘labour market attachment’ (LMA) has been launched.[2, 3]  
50  
51  
52  
53  
54  
55  
56  
57  
58  
59  
60

1  
2  
3 Some relations between labour market status and health status are widely accepted: permanent  
4 employment is considered beneficial to health, while unemployment is known to have adverse  
5 health effects[4-6] and being out of the labour market in the long term is commonly due to  
6 poor health.[7] But when it comes to the health implications of labour market status, between  
7 the extremes of the LMA spectrum, the evidence is much scarcer. Moderate LMA has been  
8 highlighted as potentially harmful for health status, but research on the topic is divergent.[8]  
9 Whereas some studies report worse self-rated health among temporary employees,[9] a few  
10 studies even suggest better self-rated health among fixed-term employees.[10] Some studies  
11 also indicate that deterioration in self-rated health may not be observable until the attachment  
12 is quite weak.[11] A major answer to the mixed research results may lie in the inherent  
13 difficulty in capturing the changeable nature of employment. Measurement of the  
14 employment situation at one or a few points in time, as in most of the previous studies,[12,  
15 13] may overlook the factual exposures to different positions. Health effects of temporary  
16 employment could surface after several years of accumulation, as we have shown in a  
17 previous report,[14] or even when several years have passed after the exposure.[15]  
18 Moreover, it is possible that it is the chain of passages in different employments, the trajectory  
19 of LMA, that contributes to health status. E.g. becoming more strongly attached over time  
20 could contribute to health status differently than becoming less attached to the labour market  
21 even if the both groups holds same total exposure.  
22  
23  
24  
25  
26  
27  
28  
29  
30  
31  
32  
33  
34  
35  
36  
37  
38  
39  
40  
41  
42  
43  
44  
45  
46  
47  
48

49 The few available studies about labour market trajectories and changes in health status have  
50 measured LMA in a few time points, and the goal has been descriptive rather than  
51 analytic.[13, 16] In the present study, particular emphasis is given to development of LMA.  
52 The method, trajectory analysis[17], offers a novel way to identify differential tracks of LMA  
53  
54  
55  
56  
57  
58  
59  
60

1  
2  
3 history in our population cohort. After obtaining a relevant set of tracks, our aim is to examine  
4  
5 in which ways they relate to non-optimal self-rated health or perceived psychological distress.  
6  
7

## 8 9 **METHOD**

### 10 **Population and procedures**

11  
12  
13  
14  
15  
16  
17  
18 The study was initiated in 1981 and included all pupils in their last year of compulsory school  
19  
20 (n=1083), in the medium-sized industrial town of Luleå in northern Sweden (95% of the  
21  
22 cohort were born in 1965). Since 1981 four additional follow-ups have been conducted.[18]  
23

24  
25 The attrition rate in the most recent follow-up from 2007 was low; 94% (n=1005) of the  
26  
27 original cohort who were still alive (n=1071) participated. Comprehensive questionnaires,  
28  
29 completed by the participants in 1981, 1983, 1986, 1995 and 2007, were used as the main  
30  
31 assessment method. This paper is based on data from the 1995 and 2007 follow-ups.  
32

33  
34 Procedures of data collection are described more extensively elsewhere.[18] The study was  
35  
36 approved by the Regional Ethical Review Board in Umeå, Sweden.  
37

### 38 **Measurements**

#### 39 LMA history

40  
41  
42  
43  
44 Participants' labour market position from 1996 to 2007 was measured with a matrix  
45  
46 consisting of columns representing half-year periods and rows representing different labour  
47  
48 market positions. With the instruction 'During which periods have you been employed  
49  
50 permanently or have had some type of temporary job contract or have been out of work?' the  
51  
52 respondents were prompted to choose between 11 response options for each six-month period:  
53  
54  
55 'permanently employed' (coded as 10), 'entrepreneur' (9), 'employed in project' (8),  
56  
57 'substitute' (7), 'probationary employment' (6), 'on-demand worker' (5), 'seasonal worker'  
58  
59  
60

1  
2  
3 (4), 'temporary employee for other reasons' (3), 'in employment policy measure' (2),  
4  
5 'unemployed' (2), 'out of the labour market' (1). Unemployment and participation in policy  
6  
7 measure were merged, and each option was coded to a variable that expressed the strength of  
8  
9 LMA on a scale from 10 to 1, similar to previous research on LMA.[14] In the event of 'out  
10  
11 of labour market', a continuum of five or more periods (i.e. 2.5 years) was required: if there  
12  
13 were fewer than five, all periods were coded according to the last labour market position, to  
14  
15 purposely exclude those on parental leave or studying from this category. These operations  
16  
17 thus yielded a score of the strength of LMA for each of the 24 successive half-year periods.  
18  
19 The scores served as the data for the trajectory analysis.  
20  
21  
22  
23  
24  
25  
26  
27

#### 28 Indicators of health status

29  
30 *Psychological distress at age 30 and 42* was measured with a question that inquired whether  
31  
32 the respondent during the last year had experienced any of the following symptoms:  
33  
34 restlessness, concentration problems, being worried or anxious, palpitations, anxiety or panic  
35  
36 or other nervous problems. Reporting one or more of the six symptoms was coded as 1 and  
37  
38 none as 0, equalling a dichotomisation into the quartile with the most symptoms versus the  
39  
40 rest. The question was derived from the 'Survey of living conditions'.[19]  
41  
42  
43  
44  
45  
46

47 *Non-optimal self-rated health at age 30 and 42*, was measured with one question, 'How do  
48  
49 you rate your general health?', with response options: good, average or bad.[19] The  
50  
51 responses were dichotomised into the quartile with the worst health (average or bad) coded as  
52  
53 1, and the rest (good) coded as 0.[20, 21]  
54  
55  
56  
57  
58  
59  
60

## Covariates

*Socioeconomic position (SEP) in 2007* was based on one question about occupation, which was classified according to the Swedish socioeconomic classification of occupational categories.[22] Upper white-collar and self-employed were coded as 0, lower white-collar workers were coded as 1 and blue-collar workers were coded as 2.

*Parental status in 2007*, was coded as 0 for those having children and as 1 for the childless.

*Marital status in 2007* was measured with one question: ‘Are you married or co-habiting?’

Yes was coded as 0 and no as 1.

## Statistics

Trajectory analysis provided by Mplus program package was used to cluster the participants according their LMA history over the 12 years. The application of the statistics to corresponding data has been described elsewhere.[2, 17] For the present data, it was possible to include 12 time points in the trajectory analysis. The first and the second half of every second year were chosen in order to take into account possible systematic seasonal variation of LMA. The form of probability distribution for such data is multinomial, and on basis of the information criteria the quadratic polynomial trajectory model was preferred to the linear model.

We used logistic regression (odds ratio and 95% CI) to test whether LMA history was associated with non-optimal self-rated health and psychological distress at age 42.

Adjustments were made for the health indicator at age 30, gender, socioeconomic position,



1  
2  
3 parental status and marital status. SPSS v17 was used for the regression analyses. Women and  
4  
5 men were analysed together to preserve power.  
6  
7  
8  
9

## 10 11 **RESULTS**

12  
13  
14 In the trajectory analysis, values of the information criteria functions decreased as the number  
15  
16 of trajectories was increased up to eight, which was considered optimal regarding the  
17  
18 variation of the trajectories. Figure 1 illustrates the 'labour market tracks' based on means of  
19  
20 the LMA scores of the individuals classified into each trajectory. This information was  
21  
22 collapsed into four major labour market tracks as follows. More than half of the cohort was  
23  
24 clustered into the track of 'permanent' employment throughout the follow-up. Moreover, a  
25  
26 considerable part (tracks 2 and 3) maintained a continuously 'high level' of attachment, and  
27  
28 about 12% (tracks 5 and 7) displayed a 'strengthening' of attachment towards the end of the  
29  
30 follow-up. The attachment was permanently weak in about one of 10 (track 8), and a small  
31  
32 cluster with a U-shaped pattern (track 4) was also seen; we decided to collapse these clusters  
33  
34 and defined their attachment as 'poor'. Track 1, with three % of the cohort, included mainly  
35  
36 disability pension recipients; they were excluded as their health was poor by definition. Thus,  
37  
38 the final variable, called LMA history, comprised four tracks characterised as 'permanent',  
39  
40 'high level', 'strengthening' and 'poor'.  
41  
42  
43  
44  
45

46 (Figure 1 here)  
47  
48  
49  
50  
51  
52  
53  
54  
55  
56  
57  
58  
59  
60

Table 1. Distribution (%) of dependent and independent variables in relation to LMA history. All values are displayed in %, except p-values.

|                               | n=550     | n=163      | n=126         | n=130 | P-value          |
|-------------------------------|-----------|------------|---------------|-------|------------------|
|                               | Permanent | High level | Strengthening | Poor  | ( $\chi^2$ test) |
| Track                         | 0         | 1          | 2             | 3     |                  |
| Dependent variables age 42    |           |            |               |       |                  |
| Psychological distress        | 26.3      | 35.7       | 41.0          | 52.8  | <0.001           |
| Non-optimal self-rated health | 29.1      | 36.2       | 39.2          | 48.1  | <0.001           |
| Independent variables         |           |            |               |       |                  |
| Health status at age 30       |           |            |               |       |                  |
| Psychological distress        | 19.4      | 27.3       | 36.3          | 31.9  | <0.001           |
| Non-optimal self-rated health | 16.8      | 29.4       | 26.6          | 33.3  | <0.001           |
| Sociodemographics             |           |            |               |       |                  |
|                               |           |            |               |       | <0.001           |
| Blue-collar worker            | 33.5      | 25.8       | 35.7          | 47.7  |                  |
| Lower white-collar worker     | 15.7      | 8.0        | 18.3          | 6.2   |                  |
| Upper white-collar worker     | 50.8      | 66.3       | 46.0          | 46.2  |                  |
| Single marital status         | 19.1      | 20.9       | 22.2          | 32.6  | 0.010            |
| No child as parental status   | 17.3      | 16.6       | 15.1          | 19.4  | 0.831            |
| Women                         | 44.5      | 42.3       | 61.9          | 55.4  | 0.001            |

Table 1 shows the distribution of the key variables by LMA history. In general, LMA history with less strong attachment entailed poorer health at age 42. Concerning covariates, similar patterns were seen for psychological distress and non-optimal self-rated health at age 30, thus indicating that health status differed between LMA history already at baseline. There were also significant differences with regard to socioeconomic position; the proportion of blue-collar workers was highest in the group with poor attachment to the labour market. The poor attachment group was also most likely to be living without a partner ( $p=.010$ ). Parental status did not differ between the groups. The proportion of women was higher in strengthening and poor level attachment, whereas the permanent and high level attachment were dominated by men ( $p=.001$ ).

Table 2. Odds ratios (OR) and 95% confidence intervals (CI) for psychological distress and non-optimal self-rated health at age 42 as dependent variable for LMA history over 12 years as main exposure after adjustment for health status age 30, sociodemographic variables.

| Psychological distress as outcome        |       |                  |                  |                  |                  |
|------------------------------------------|-------|------------------|------------------|------------------|------------------|
| Trajectories                             |       | Model 0          | Model 1          | Model 2          | Model 3          |
| Permanent                                | n=550 | 1                | 1                | 1                | 1                |
| High level                               | n=163 | 1.55 (1.06–2.27) | 1.56 (1.06–2.30) | 1.50 (0.99–2.28) | 1.54 (1.01–2.35) |
| Strengthening                            | n=126 | 1.95 (1.29–2.93) | 1.77 (1.17–2.69) | 1.68 (1.07–2.66) | 1.57 (0.99–2.49) |
| Poor                                     | n=130 | 3.14 (2.10–4.70) | 2.77 (1.83–4.19) | 2.87 (1.83–4.49) | 2.52 (1.59–3.98) |
| P-value for LMA                          |       | <0.001           | <0.001           | <0.001           | 0.001            |
| Non-optimal self-rated health as outcome |       |                  |                  |                  |                  |
| Trajectories                             |       | Model 0          | Model 1          | Model 2          | Model 3          |
| Permanent                                | n=550 | 1                | 1                | 1                | 1                |
| High level                               | n=163 | 1.38 (0.96–2.00) | 1.46 (1.00–2.13) | 1.19 (0.81–1.76) | 1.26 (0.85–1.87) |
| Strengthening                            | n=126 | 1.57 (1.05–2.36) | 1.52 (1.00–2.29) | 1.44 (0.94–2.20) | 1.40 (0.91–2.16) |
| Poor                                     | n=130 | 2.26 (1.53–3.34) | 2.00 (1.34–3.00) | 1.83 (1.21–2.77) | 1.65 (1.08–2.53) |
| P-value for LMA                          |       | <0.001           | 0.003            | 0.025            | 0.087            |

Model 0 crude odds ratios

Model 1 odds ratios adjusted for sociodemographic variables (socioeconomic position, gender, marital status and parental status).

Model 2 odds ratios adjusted for health status at age 30

Model 3 odds ratios adjusted for models 1+2.

To analyse whether LMA history was related to poor health, self-rated health and psychological distress were regressed on LMA history with permanent attachment as the reference category, in multiple logistic regression models (Table 2). The LMA history had a significant overall p-value on both health outcomes. In unadjusted analyses with psychological distress, lower strength of attachment involved higher odds than permanent (Table 2, Model 0; LMA history  $p < 0.001$ ). In model 0 we found increased OR in relation to lower attachment to the labour market, ranging from high level OR 1.55, strengthening OR 1.95, and poor OR 3.14. Adjusting for covariates (sociodemographic and psychological distress at age 30, Models 1 and 2, respectively) resulted in attenuation of the ORs for those

1  
2  
3 with 'strengthening' and 'poor' attachment. Lastly, in the fully adjusted models (Model 3)  
4  
5 only the high level and poor attachment were significantly related to psychological distress,  
6  
7 with the 'poorly' attached displaying the numerically strongest association (OR=2.52).  
8  
9 Although borderline significant, the OR for the 'strengthening' (OR=1.57) attachment was of  
10  
11 comparable strength to the 'high level' attachment (OR=1.54). While with a slight decrease in  
12  
13 OR along with adjustments for sociodemographic factors and previous health, the same  
14  
15 pattern is still evident in the final model, and the overall p value remained highly significant  
16  
17 (p=.001).  
18  
19  
20  
21  
22  
23

24  
25 Results for non-optimal self-rated health were slightly less prominent than for psychological  
26  
27 distress but pointed in the same direction. Unadjusted models (Table 2, Model 0) showed a  
28  
29 significant overall relationship between LMA history and self-rated health (p<.001), and the  
30  
31 LMA history with 'strengthening'(OR= 1.57) and 'poor'(OR=2.26) attachment had higher  
32  
33 odds of having non-optimal self-rated health. For those with 'high level' (OR=1.38) of  
34  
35 attachment the risk was numerically higher, although not significantly, than for those with  
36  
37 'permanent' attachment. After adjustment for health status at age 30 (Model 2) the results for  
38  
39 the 'strengthening' group were attenuated below significance. In the final model, only the OR  
40  
41 for the 'poor' attachment group was significantly high, while the overall p-value for the  
42  
43 association of LMA history with non-optimal health dropped to borderline significance  
44  
45 (p=.087).  
46  
47  
48  
49  
50  
51  
52  
53  
54  
55  
56  
57  
58  
59  
60

## DISCUSSION

In this study we have identified four tracks of LMA history over 12 years: permanent, high level, strengthening and poor. Compared to the cohort with 'permanent' attachment, we found a higher probability of psychological distress among three cohorts with non-permanent LMA. The differences were partially attributed to previous health and to some extent also to sociodemographic variables; nevertheless, the overall contribution of LMA history remained significant in the fully adjusted model. The results for non-optimal self-rated health were similar but somewhat weaker.

Much of the previous research has suggested that temporary employment is a stepping stone towards more stable employment.[23] In the present study we found that, although the greater part of the sample already had a fairly strong attachment or were moving towards stronger attachment, one track remained poorly attached to the labour market over the 12 years. Thus, while the stepping stone hypothesis might be correct for the majority, a substantial minority appear to be trapped in an employment situation of permanent temporariness. Further, we found more women than men in this least favourable situation. This is probably explained by the widespread use of 'on-demand employment contracts' in women-dominated sectors of business[24] such as care and welfare and education.[25]

Our findings importantly suggest that in addition to the present LMA, the LMA history is important for health. In line with previous research we found that the group with least attachment had the worst health status.[9, 11] As in our previous report showing a cumulative effect of temporary employment on health status,[14] the present report further corroborates

1  
2  
3 that employment history impacts on health status. However, a more nuanced picture emerged  
4  
5 when the separate labour market tracks were considered.  
6  
7  
8  
9

10  
11 First, even those with 'high level' attachment experienced psychological distress more  
12  
13 commonly than those with 'permanent' attachment. Thus, it appears that even marginal  
14  
15 exposure to what could be labelled 'LMA stress', can contribute to psychological distress  
16  
17 over time.  
18  
19

20  
21  
22  
23 Second, the group with 'strengthening' attachment, still experienced poor health more  
24  
25 commonly than those with permanent attachment, even after adjustments for  
26  
27 sociodemographic variables. This result suggests that earlier suboptimal attachment has a  
28  
29 potentially 'scarring' effect. It is important to point out that in cross-sectional or short-term  
30  
31 longitudinal designs, the 'strengthening' group would have been regarded as having a fairly  
32  
33 favourable labour market attachment. This particular finding therefore stresses the importance  
34  
35 of taking the specific patterns of the long-term labour market history into account when  
36  
37 examining associations with health status.  
38  
39  
40  
41  
42  
43  
44

45  
46 Third, among those poorly attached to the labour market is where we found the highest ORs  
47  
48 for poor health. The poorly attached were also more likely to have other risk factors for  
49  
50 psychological distress, which seemed to partly account for the association. For example, being  
51  
52 single involves a lower average household income and decreases the level of control [26], and  
53  
54 poor previous health could also contribute to difficulties getting a stable attachment to the  
55  
56 labour market, as those with health troubles could be less employable, particularly for blue-  
57  
58  
59  
60

1  
2  
3 collar occupations[27]. The poorly attached are also those with most experience of  
4  
5 unemployment, which previously has been connected to mortality and morbidity[4, 28]. Thus,  
6  
7 the poor mental health in this group seems to be a result not only of their enduringly  
8  
9 unfavourable LMA history, but also of a range of coexisting burdensome life circumstances.  
10

### 11 12 13 14 15 16 **Methodological considerations**

17  
18 Our study relies on trajectory analysis, a method that became available in the beginning of the  
19  
20 2000s, largely by virtue of increased computing power. Instead of prefixing alternative  
21  
22 developments, the analysis is seeking developmental trajectories that emerge from the data  
23  
24 itself [17]. It gives each individual posterior probability values for each trajectory, and  
25  
26 allocates them according to the highest probability into groups or categories so that  
27  
28 individuals within a group are more similar than individuals between groups [29]. To our  
29  
30 knowledge, trajectory analysis has been used only sparsely in previous studies about  
31  
32 LMA.[30] In general, this study represents novel methodological ideas in a research area that  
33  
34 has been obscured by the practice of measuring the labour market position cross-sectionally or  
35  
36 with short-term transitions between labour market positions.  
37  
38  
39

40  
41  
42 The longitudinal design of this study has been an asset, as it made it possible to adjust for  
43  
44 previous health and thereby reduced the possibility of reverse causation, and especially as the  
45  
46 attrition rate was kept low. Concerning the generalisability of this study, this cohort has been  
47  
48 shown by a previous assessment to be representative of Sweden as a whole concerning  
49  
50 demographic data.[18]  
51  
52  
53  
54  
55  
56  
57  
58  
59  
60

1  
2  
3 This study is based on self-reported data. Equivalent measures of self-rated health and  
4  
5 psychological distress have displayed good validity by predicting future mortality and  
6  
7 morbidity[31] even after adjustments for known health risks.[32] Furthermore, using  
8  
9 retrospective measurement of LMA history could lead to recall bias, which could cause an  
10  
11 underestimation of time in non-permanent contracts. Nevertheless, retrospective questions  
12  
13 about occupational history have been shown to maintain good quality in terms of agreement  
14  
15 with census data.[33]  
16  
17  
18  
19

20  
21 Further, the fact that we combined tracks could be seen as a limitation of this study. However,  
22  
23 in our understanding some of the tracks could be combined depending on their similar  
24  
25 movement in the labour market. We first analysed each of the eight tracks separately in  
26  
27 relation to the outcome, to make sure that none of combinations resulted in blurring of the  
28  
29 results (data not shown). One limitation regarding the method was that, due to features of the  
30  
31 program, only half of the time points (12 of 24 possible time points) could be included in the  
32  
33 trajectory analysis. However, we used the first and second half of every second year to reduce  
34  
35 the possibility of systematic error due to seasonal variations in employment status.  
36  
37  
38  
39

40  
41 The structure behind the conceptualisation of LMA needs consideration. The LMA structure  
42  
43 is based on the idea that there is a gradient in the labour market, with some positions being  
44  
45 more strongly attached to the labour market than others. We have used a modified version of  
46  
47 Aronsson's core-periphery model[34] to order the type of employment contract/situation,  
48  
49 from the most attached to the least attached to labour market. Our structure is indeed a  
50  
51 simplification of a more complex reality; this should be considered when interpreting the  
52  
53 results.  
54  
55  
56  
57  
58  
59  
60



## Conclusions

Policymakers frequently promote flexible employment contracts. However, this study shows that those with the most favourable but long-term high level attachment suffer from worse health than those permanently attached. Further, despite a development towards favourable employment circumstances, health discrepancies can endure, suggesting a potentially 'scarring' effect. Last, those poorly attached display the worst health situation, this partly due to coexisting burdensome life circumstances. We firmly suggest that policymakers should consider the results of this study and take responsibility for creating employment opportunities suitable for maintaining a healthy working life, rather than promoting employment contracts characterised by poor attachment to the labour market.

## ACKNOWLEDGEMENT

Thanks to all the participants in the Northern Swedish Cohort. Liudmila Lipiäinen and Tapio Nummi are thanked for contributing to this paper with regard to the trajectory analysis.

## COMPETING INTERESTS

None declared.

## FUNDING

This work was supported by Swedish Council for Working Life and Social Research [2006-0950] the Medical Faculty at Umeå University and the Academy of Finland [grant number 132668 to PV]. The study has been financed by Formas dnr 259-2012-37.

### Key messages

- There is controversy whether being less attached to the labour market is related to poor health or not.
- This unclarity might partly stem from the failure to take heterogeneous employment histories into consideration
- We have applied trajectory analysis on 12-year labour market history and found associations between labour market attachment and health status.
- Those with high level, strengthening and poor level of non-permanent attachment displayed worse health status than those in permanent employment the entire 12-year period.
- Our findings illustrate the temporal complexities of labour market attachment's impact on health over time

## REFERENCES

- 1 OECD. Labour and Social Affairs. Incidence of temporary employment.: OECD  
2  
3  
4  
5  
6  
7 Online OECD Employment database [cited 12 December 2012, available at  
8  
9  
10  
11  
12  
13  
14  
15  
16  
17  
18  
19  
20  
21  
22  
23  
24  
25  
26  
27  
28  
29  
30  
31  
32  
33  
34  
35  
36  
37  
38  
39  
40  
41  
42  
43  
44  
45  
46  
47  
48  
49  
50  
51  
52  
53  
54  
55  
56  
57  
58  
59  
60
- 1 OECD. Labour and Social Affairs. Incidence of temporary employment.: OECD  
Online OECD Employment database [cited 12 December 2012, available at  
www.oecd.org/employment/database]  
2012.
- 2 Virtanen P, Lipiäinen L, Hammarström A, *et al.* Tracks of labour market attachment in  
early middle age: A trajectory analysis over 12 years. *Adv Life Course Res* 2011;**16**:55-64.
- 3 Furåker B, Berglund T. Changes of Employer, Employment Protection Legislation and  
Labour Market Attachment. *6:th Conference in Memory of Professor Marco Biagi*. Modena,  
Italy 2008.
- 4 Dooley D, Fielding J, Levi L. Health and unemployment. *Anu Rev Publ Health*  
1996;**17**:449-65.
- 5 Hammarström A. Youth unemployment and ill health: results from a two-year follow-  
up study [in Swedish, summary in English]. Solna: Karolinska Institutet 1986.
- 6 McKee-Ryan FM, Song ZL, Wanberg CR, *et al.* Psychological and physical well-  
being during unemployment: A meta-analytic study. *J Appl Psychol* 2005;**90**:53-76.
- 7 Brenner H, Ahern W. Sickness absence and early retirement on health grounds in the  
construction industry in Ireland. *Occup Environ Med* 2000;**57**:615-20.
- 8 Ferrie JE, Westerlund H, Virtanen M, *et al.* Flexible labor markets and employee  
health. *Scandinavian Journal of Work, Environment & Health* 2008:98-10.
- 9 Kim MH, Kim CY, Park JK, *et al.* Is precarious employment damaging to self-rated  
health? Results of propensity score matching methods, using longitudinal data in South  
Korea. *Social Science & Medicine* 2008;**67**:1982-94.

- 1  
2  
3 10 Virtanen P, Vahtera J, Kivimaki M, *et al.* Employment security and health. *Journal of*  
4  
5 *Epidemiology and Community Health* 2002;**56**:569-74.  
6  
7 11 Virtanen P, Liukkonen V, Vahtera J, *et al.* Health inequalities in the workforce: the  
8  
9 labour market core-periphery structure. *International Journal of Epidemiology* 2003;**32**:1015-  
10  
11 21.  
12  
13 12 Bardasi E, Francesconi M. The impact of atypical employment on individual  
14  
15 wellbeing: evidence from a panel of British workers. *Social Science and Medicine*  
16  
17 2004;**58**:1671-88.  
18  
19 13 Virtanen P, Vahtera J, Kivimaki M, *et al.* Labor market trajectories and health: a four-  
20  
21 year follow-up study of initially fixed-term employees. *Am J Epidemiol* 2005;**161**:840-46.  
22  
23 14 Waenerlund AK, Gustafsson PE, Virtanen P, *et al.* Is the core-periphery labour market  
24  
25 structure related to perceived health? findings of the Northern Swedish Cohort. *BMC Public*  
26  
27 *Health* 2011;**11**:10.  
28  
29 15 Broughton A, Biletta I, Kullander M. Flexible forms of work: 'very atypical'  
30  
31 contractual arrangements. European Foundation for the Improvement of Living and Working  
32  
33 Conditions 2010.  
34  
35 16 Liukkonen V, Virtanen P, Vahtera J, *et al.* Employment trajectories and changes in  
36  
37 sense of coherence. *Eur J Public Health* 2010;**20**:293-8.  
38  
39 17 Nagin DS. Analyzing developmental trajectories: A semiparametric, group-based  
40  
41 approach. *Psychol Methods* 1999;**4**:139-57.  
42  
43 18 Hammarström A, Janlert U. Cohort Profile: The Northern Swedish Cohort. *Int J*  
44  
45 *Epidemiol* 2011.  
46  
47 19 Statistics Sweden. Undersökning om levnadsförhållande [In English: Survey of living  
48  
49 conditions]. Stockholm: Statistics Sweden 1980.  
50  
51  
52  
53  
54  
55  
56  
57  
58  
59  
60

- 1  
2  
3 20 Hammarström A, Virtanen P, Janlert U. Are the health consequences of temporary  
4 employment worse among low educated than among high educated? *Eur J Public Health*  
5 2010.  
6  
7  
8  
9  
10 21 Waenerlund AK, Virtanen P, Hammarström A. Is temporary employment related to  
11 health status? Analysis of the Northern Swedish Cohort. *Scand J Public Health* 2011;**39**:533-  
12 9.  
13  
14  
15  
16 22 Statistics Sweden. Socioekonomisk indelning (SEI). Meddelande i samordningsfrågor  
17 1982:4 (Swedish Socioeconomic Classification). Stockholm: Statistics Sweden 1983.  
18  
19  
20  
21 23 Cockx B, Picchio M. Are Short-lived Jobs Stepping Stones to Long-Lasting Jobs? *Oxf*  
22 *Bull Econ Stat* 2012;**74**:646-75.  
23  
24  
25 24 Aronsson G, Gustafsson K, Dallner M. Work environment and health in different  
26 types of temporary jobs. *European Journal of Work and Organizational Psychology*  
27 2002;**11**:151-75.  
28  
29  
30  
31  
32 25 Statistics Sweden. Women and men in Sweden 2012. Örebro: Statistics Sweden 2012.  
33  
34 26 Mirowsky J, Ross C. *Social Causes of Psychological Distress*. New York: Aldine De  
35 Gruyter 2003.  
36  
37  
38 27 Strully KW. Job loss and health in the US labour market. *Demography* 2009;**46**:221-  
39 46.  
40  
41  
42 28 Bartley M. Unemployment and Ill Health - Understanding the Relationship. *J*  
43 *Epidemiol Community Health* 1994;**48**:333-7.  
44  
45  
46  
47 29 Jung T, Wickrama KAS. An Introduction to Latent Class Growth Analysis and  
48 Growth Mixture Modeling. *Social and Personality Psychology Compass* 2008;**2**:302-17.  
49  
50  
51 30 Hynes K, Clarkberg M. Women's employment patterns during early parenthood: A  
52 group-based trajectory analysis. *J Marriage Fam* 2005;**67**:222-39.  
53  
54  
55  
56  
57  
58  
59  
60

- 1  
2  
3 31 Weitoft GR, Rosén M. Is perceived nervousness and anxiety a predictor of premature  
4 mortality and severe morbidity? A longitudinal follow up of the Swedish survey of living  
5 conditions. *Journal of Epidemiology and Community Health* 2005;**59**:794-8.  
6  
7  
8  
9  
10 32 Idler EL, Benyamini Y. Self-rated health and mortality: a review of twenty-seven  
11 community studies. *Journal of Health and Social Behaviour* 1997;**38**:21-37.  
12  
13  
14 33 Wårneryd B, Thorslund M, Ostlin P. The quality of retrospective questions about  
15 occupational history--a comparison between survey and census data. *Scand J Soc Med*  
16  
17  
18 1991;**19**:7-13.  
19  
20  
21 34 Aronsson G, Gustafsson K, Dallner M. Forms of employment, work environment and  
22 health in to a centre - periphery perspective. *Arbete och Hälsa (Work and Health)*. Stockholm:  
23 National Institute for Working Life 2000.  
24  
25  
26  
27  
28  
29  
30  
31  
32  
33  
34  
35  
36  
37  
38  
39  
40  
41  
42  
43  
44  
45  
46  
47  
48  
49  
50  
51  
52  
53  
54  
55  
56  
57  
58  
59  
60

1  
2  
3 Figure 1. The number of cohort members clustered by trajectory analysis into eight tracks  
4 (curves based on means of the attachment at the time points).  
5  
6  
7  
8  
9  
10  
11  
12  
13  
14  
15  
16  
17  
18  
19  
20  
21  
22  
23  
24  
25  
26  
27  
28  
29  
30  
31  
32  
33  
34  
35  
36  
37  
38  
39  
40  
41  
42  
43  
44  
45  
46  
47  
48  
49  
50  
51  
52  
53  
54  
55  
56  
57  
58  
59  
60

For peer review only

1  
2  
3  
4  
5  
6  
7  
8  
9  
10  
11  
12  
13  
14  
15  
16  
17  
18  
19  
20  
21  
22  
23  
24  
25  
26  
27  
28  
29  
30  
31  
32  
33  
34  
35  
36  
37  
38  
39  
40  
41  
42  
43  
44  
45  
46  
47  
48  
49  
50  
51  
52  
53  
54  
55  
56  
57  
58  
59  
60

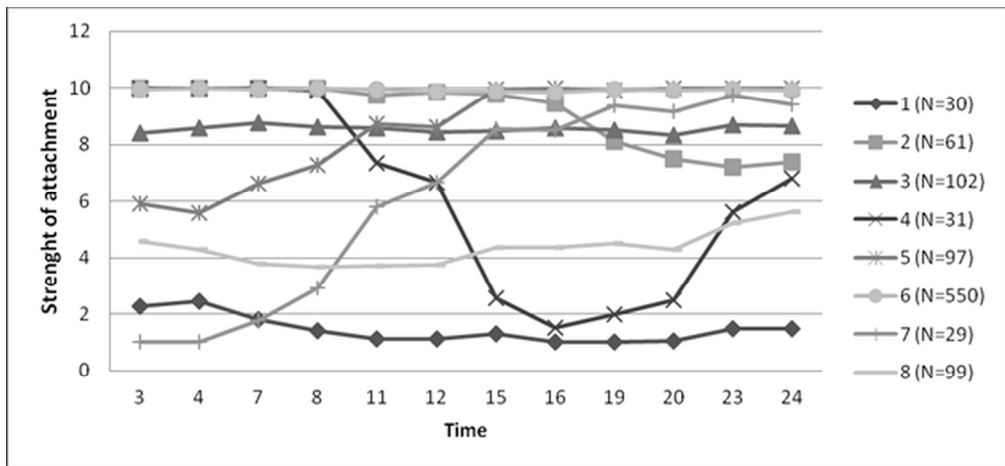

195x90mm (300 x 300 DPI)

Peer review only



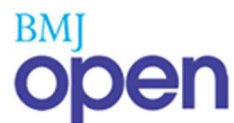

**History of labour market attachment as determinant of the health status: a 12-year follow-up of the Northern Swedish Cohort**

|                                 |                                                                                                                                                                                                                                                                                                                                                  |
|---------------------------------|--------------------------------------------------------------------------------------------------------------------------------------------------------------------------------------------------------------------------------------------------------------------------------------------------------------------------------------------------|
| Journal:                        | <i>BMJ Open</i>                                                                                                                                                                                                                                                                                                                                  |
| Manuscript ID:                  | bmjopen-2013-004053.R1                                                                                                                                                                                                                                                                                                                           |
| Article Type:                   | Research                                                                                                                                                                                                                                                                                                                                         |
| Date Submitted by the Author:   | 02-Dec-2013                                                                                                                                                                                                                                                                                                                                      |
| Complete List of Authors:       | Waenerlund, Anna-Karin; Umeå University, Public Health and Clinical Medicine<br>Gustafsson, Per; Umeå University, Public Health and Clinical Medicine<br>Hammarström, Anne; Umeå University, Public Health and Clinical Medicine<br>Virtanen, Pekka; University of Tampere, School of Health Sciences and Institute for Advanced Social Research |
| <b>Primary Subject Heading</b>: | Occupational and environmental medicine                                                                                                                                                                                                                                                                                                          |
| Secondary Subject Heading:      | Epidemiology, Occupational and environmental medicine, Public health                                                                                                                                                                                                                                                                             |
| Keywords:                       | EPIDEMIOLOGY, OCCUPATIONAL & INDUSTRIAL MEDICINE, PUBLIC HEALTH                                                                                                                                                                                                                                                                                  |
|                                 |                                                                                                                                                                                                                                                                                                                                                  |

SCHOLARONE™  
Manuscripts

1  
2  
3  
4  
5 **History of labour market attachment as determinant of the health status: a**  
6 **12-year follow-up of the Northern Swedish Cohort**  
7  
8  
9

10  
11  
12 ANNA-KARIN WAENERLUND<sup>1</sup>, PER E GUSTAFSSON<sup>1</sup>, ANNE HAMMARSTRÖM<sup>1</sup>,  
13  
14 PEKKA VIRTANEN<sup>2,3</sup>  
15  
16  
17  
18  
19

20  
21 <sup>1</sup>Department of Public Health and Clinical Medicine, Family Medicine, Umeå University,  
22  
23 Umeå, Sweden.  
24

25  
26 <sup>2</sup>School of Health Sciences and Institute for Advanced Social Research, University of  
27  
28 Tampere, Finland.  
29

30  
31 <sup>3</sup> Department of Public Health and Clinical Medicine, Epidemiology and Global Health,  
32  
33 Umeå University, Umeå, Sweden.  
34  
35  
36  
37  
38

39  
40 Correspondence: Anna-Karin Waenerlund, Department of Public Health and Clinical  
41  
42 Medicine, Umeå University, SE-901 85, Umeå, Sweden. Telephone: +46 90 785 35 81. Fax  
43  
44 number: +46 90 77 68 83  
45

46  
47 E-mail address: [annakarin.waenerlund@fammed.umu.se](mailto:annakarin.waenerlund@fammed.umu.se)  
48

49  
50 Word count: 5087  
51

52  
53 Keywords: public health, psychological distress, employment, cohort, health, trajectory  
54  
55 analysis.  
56  
57  
58  
59  
60

## ABSTRACT

**Objective:** The present study aims at using trajectory analysis to measure labour market attachment (LMA) over 12 years and at examining whether labour market tracks relate to perceived health status.

**Design:** Data were retrieved from a 26-year prospective cohort study, the Northern Swedish Cohort.

**Setting and participants:** All 9th grade students (n=1083) within the municipality of Luleå in northern Sweden were included in the baseline investigation in 1981. The vast majority (94%) of the original cohort participated at the fourth follow-up. In this study, 969 participants were included.

**Measures:** Perceived health status (psychological distress and non-optimal self-rated health) at age 42 and the data obtained from questionnaires.

**Results:** We have identified four tracks in relation to LMA across the 12-year period: 'permanent', 'high level', 'strengthening' and 'poor level' of attachment. LMA history relates to psychological distress. High level (OR 1.55 (1.06-2.27)), strengthening (OR 1.95 (1.29-2.93)) and poor attachment (OR 3.14 (2.10-4.70)) involve higher OR for psychological distress compared to permanent attachment. The overall p-value remained significant in the final model (0.001). Analyses regarding non-optimal self-rated health displayed a similar pattern but this was not significant in the final model.

**Conclusions:** Our results suggest that health status in mid-life, particularly psychological distress, is related to patterns of LMA history, to a large part independently of other social risk factors and previous health. Consideration of heterogeneity and time in labour market attachment might be important when analysing associations with perceived health.

1  
2  
3 Main strengths  
4  
5

- 6 • Using longitudinal data with exceptionally high response-rate
- 7
- 8
- 9 • Applying trajectory analysis which only has previously been sparsely used in this field
- 10
- 11
- 12 • Provides a uniquely rich and detailed data on temporary contracts over a long period
- 13
- 14 of time
- 15

16  
17 Limitations  
18  
19

- 20 • Relies on self-reported data
- 21
- 22
- 23 • Used a relatively small sample
- 24
- 25

26  
27 Key messages  
28

- 29 • There is controversy whether being less attached to the labour market is related to
- 30 poor health or not.
- 31 • This unclarity might partly stem from the failure to take heterogeneous
- 32 employment histories into consideration
- 33
- 34 • We have applied trajectory analysis on 12-year labour market history and found
- 35 associations between labour market attachment and health status.
- 36
- 37 • Those with high level, strengthening and poor level of non-permanent attachment
- 38 displayed worse health status than those in permanent employment the entire 12-
- 39 year period.
- 40
- 41 • Our findings illustrate the temporal complexities of labour market attachment's
- 42 impact on health over time
- 43
- 44
- 45
- 46
- 47
- 48
- 49
- 50
- 51
- 52
- 53
- 54
- 55
- 56
- 57
- 58
- 59
- 60

## INTRODUCTION

During the last three decades or so, demands for a more flexible workforce have increased all over the world. Flexibility in the labour market is reflected, for example, in the proportion of temporary employees, which in recent years has varied between 13 and 15% of the total working population in Europe.[1] To the individual, the consequence of the flexible employment means that attachment to a workplace is weak and commonly interrupted by unemployment and other episodes out of work. In order to capture the total spectrum of employment relations, both with regard to quality and quantity, we have chosen to work with the concept of 'labour market attachment' (LMA) in this study. In our definition of the LMA spectra we have included permanent, non-permanent employment, unemployment and those who are exempted from working. [2-4]

Some relations between labour market status and health status are widely accepted: permanent employment is considered beneficial to health, while unemployment is known to have adverse health effects[5-7] and being out of the labour market in the long term is commonly due to poor health.[8] But when it comes to the health implications of labour market status, between the extremes of the LMA spectrum, the evidence is much scarcer. Previous studies has proposed that temporary employment could be a risk of poor psychosocial work characteristics[9] with temporary employees more commonly experiencing job insecurity and having a low cash margin [10], which are some of the factors that can be a potential pathways linking weak LMA to poor health. We have for example shown that long term temporary employees often experience difficulties to work full-time (underemployment) which influences their financial situation in a negative way [11]which can be a source of worry.[12] Poor health could also be mediated through job strain, although it seems as this group affected more by limited influence or control rather than high demands.[13] Moderate LMA has been highlighted as potentially harmful for health status, but research on the topic is divergent.[14]

1  
2  
3 Whereas some studies report worse self-rated health among temporary employees,[15] a few  
4  
5 studies even suggest better self-rated health among fixed-term employees.[16] Some studies  
6  
7 also indicate that deterioration in self-rated health may not be observable until the attachment  
8  
9 is quite weak.[17] A major answer to the mixed research results may lie in the inherent  
10  
11 difficulty in capturing the changeable nature of employment. Measurement of the  
12  
13 employment situation at one or a few points in time, as in most of the previous studies,[18,  
14  
15 19] may overlook the factual exposures to different positions. Health effects of temporary  
16  
17 employment could surface after several years of accumulation, as we have shown in a  
18  
19 previous report,[20] or even when several years have passed after the exposure.[21]  
20  
21  
22 Moreover, it is possible that it is the chain of passages in different employments, the trajectory  
23  
24 of LMA, that contributes to health status. E.g. becoming more strongly attached over time  
25  
26 could contribute to health status differently than becoming less attached to the labour market  
27  
28 even if the both groups holds same total exposure.  
29  
30  
31  
32  
33  
34

35  
36 There are a lot of studies about particular labour market status as predictor of health. An  
37  
38 inherent problem of such studies is the amount of exposure: cross-sectional information of the  
39  
40 status includes great variation, a variable based on duration of the ongoing status is bound to  
41  
42 use cross-sectional health data, and in prospective follow-up settings there may be periods in  
43  
44 several statuses during the follow-up. The problem is of special importance in research of the  
45  
46 health effects of atypical employment, as there are a wide range of statuses between  
47  
48 permanent employment and overt unemployment. To address this topic, we have introduced a  
49  
50 score that sums up the exposure to different types of non-permanent employment during the  
51  
52 follow-up [20]. The score, however, does not take into account timing of the exposures. One  
53  
54 way to capture the status chains, or the passages in and the transitions between different  
55  
56 labour market positions, is provided by trajectory analysis. Applying this method with a four  
57  
58  
59  
60

1  
2  
3 class response variable (permanent employment, non-permanent employment, unemployment  
4  
5 and out of the labour force) the members of the Northern Swedish Cohort have been clustered  
6  
7 onto six different 'labour market attachment tracks'[2]. For the trajectory analysis of the  
8  
9 present study, labour market attachment was measured by a ten class indicator, in order to  
10  
11 articulate in more detail the trajectories of non-permanent employment and their association  
12  
13 with health.  
14  
15

16  
17  
18  
19  
20 The few available studies about labour market trajectories in field of public health have  
21  
22 measured LMA in a few time points, e.g. between one time point to another[9] and the goal  
23  
24 has been descriptive rather than analytic.[19, 22] In the present study, we have applied a  
25  
26 refined scale with regard to LMA. In the measure we have included a spectrum of types of  
27  
28 employment situations and also covered a time-span of 12 year. The method, trajectory  
29  
30 analysis[23], offers a novel way to identify differential tracks of LMA history in our  
31  
32 population cohort. After obtaining a relevant set of tracks, our aim is to examine in which  
33  
34 ways they relate to non-optimal self-rated health or perceived psychological distress.  
35  
36  
37  
38  
39

## 40 **METHOD**

### 41 **Population and procedures**

42  
43  
44  
45 The study was initiated in 1981 and included all pupils in their last year of compulsory school  
46  
47 (n=1083), in the medium-sized industrial town of Luleå in northern Sweden (95% of the  
48  
49 cohort were born in 1965). Since 1981 four additional follow-ups have been conducted.[24]  
50  
51 The attrition rate in the most recent follow-up from 2007 was low; 94% (n=1005) of the  
52  
53 original cohort who were still alive (n=1071) participated. Comprehensive questionnaires,  
54  
55 completed by the participants in 1981, 1983, 1986, 1995 and 2007, were used as the main  
56  
57  
58  
59  
60

1  
2  
3 assessment method. This paper is based on data from the 1995 and 2007 follow-ups.  
4  
5 Procedures of data collection are described more extensively elsewhere.[24] The study was  
6  
7 approved by the Regional Ethical Review Board in Umeå, Sweden.  
8  
9

## 10 11 12 13 **Measurements**

### 14 15 16 LMA history

17  
18  
19 We name the response variable of the trajectory analysis as “labour market attachment”  
20  
21 (LMA). It aims to serve as a conceptual and empirical tool to sort out the employment statuses  
22  
23 of the post-industrial labour market into a continuum .[25, 26] Crudely, it “refers to whether  
24  
25 or not people have continuous employment (for example all year or only part of it) and  
26  
27 whether or not they have periods of unemployment” [27] At headline level [28] there are four  
28  
29 major classes of LMA: non-employment, unemployment, temporary employment and  
30  
31 permanent employment. Within each class, several subclasses can be discerned. In the present  
32  
33 study, the interest focuses on differential temporary employment. Seen through LMA,  
34  
35 temporary employment covers a set of positions defined by formal job contracts, regardless of  
36  
37 the psychological contract, [29] job commitment [30] or perceived job insecurity.[31]  
38  
39  
40  
41  
42  
43  
44

45  
46 Participants’ labour market position from 1996 to 2007 was measured with a matrix  
47  
48 consisting of columns representing half-year periods and rows representing different labour  
49  
50 market positions. With the instruction ‘During which periods have you been employed  
51  
52 permanently or have had some type of temporary job contract or have been out of work?’ the  
53  
54 respondents were prompted to choose between 11 response options for each six-month period:  
55  
56 ‘permanently employed’ (coded as 10), ‘entrepreneur’ (9), ‘employed in project’ (8),  
57  
58  
59  
60



1  
2  
3 ‘substitute’ (7), ‘probationary employment’ (6), ‘on-demand worker’ (5), ‘seasonal worker’  
4  
5 (4), ‘temporary employee for other reasons’ (3), ‘in employment policy measure’ (2),  
6  
7 ‘unemployed’ (2), ‘out of the labour market’ (1). Unemployment and participation in policy  
8  
9 measure were merged, and each option was coded to a variable that expressed the strength of  
10  
11 LMA on a scale from 10 to 1. The ranking of contracts has been tested in previous research on  
12  
13 accumulation of temporary employment[20] and was based on Aronsson’s core-periphery  
14  
15 model [32]which proposes that there is a health gradient in relation to type of employment  
16  
17 contract. The model ranks contracts based on duration, possibility of on the job training,  
18  
19 autonomy, and job security.[32] However, we have extended the ranking by also include three  
20  
21 labour market positions of non-employment. In the event of ‘out of labour market’, a  
22  
23 continuum of five or more periods (i.e. 2.5 years) was required: if there were fewer than five,  
24  
25 all periods were coded according to the last labour market position, to purposely exclude  
26  
27 those on parental leave or studying from this category. As the last category ‘out of labour  
28  
29 market’ was given the lowest score in relation to LMA. The intention for this group was that  
30  
31 it was suppose to be contained by those mainly on sickness benefit (supported by analysis,  
32  
33 data not shown), not those temporarily not working due to parental leave or education). These  
34  
35 operations thus yielded a score of the strength of LMA for each of the 24 successive half-year  
36  
37 periods. The scores served as the data for the trajectory analysis.  
38  
39  
40  
41  
42  
43  
44  
45  
46

#### 47 Indicators of health status

48  
49 *Psychological distress at age 30 and 42* was measured with a question that inquired whether  
50  
51 the respondent during the last year had experienced any of the following symptoms:  
52  
53 restlessness, concentration problems, being worried or anxious, palpitations, anxiety or panic  
54  
55 or other nervous problems. Reporting one or more of the six symptoms was coded as 1 and  
56  
57  
58  
59  
60

1  
2  
3 none as 0, equalling a dichotomisation into the quartile with the most symptoms versus the  
4  
5 rest. The question was derived from the 'Survey of living conditions'.[33]  
6  
7  
8  
9

10  
11 *Non-optimal self-rated health at age 30 and 42*, was measured with one question, 'How do  
12  
13 you rate your general health?', with response options: good, average or bad.[33] The  
14  
15 responses were dichotomised into the quartile with the worst health (average or bad) coded as  
16  
17 1, and the rest (good) coded as 0.[10, 34]  
18  
19  
20  
21  
22  
23  
24  
25  
26  
27  
28  
29

### 30 Covariates

31  
32  
33 Socio-economic position strong predictor of health [35-38]. LMA have been shown to be  
34  
35 related to occupational class [39] it is important to consider socio-economic position as a  
36  
37 possible confounder when studying the relationship between temporary employment and  
38  
39 illness. In this study *Socioeconomic position (SEP) in 2007* was based on one question about  
40  
41 occupation, which was classified according to the Swedish socioeconomic classification of  
42  
43 occupational categories.[40] Upper white-collar and self-employed were coded as 0, lower  
44  
45 white-collar workers were coded as 1 and blue-collar workers were coded as 2.  
46  
47  
48

49 Also partnership and parenthood are important factors in relation to LMA as these two may be  
50  
51 postponed due to insecure working arrangement [39, 41], which could influence social aspects  
52  
53 related to illness [39]. Marriage or having a partner is also important to consider when  
54  
55 studying LMA, as it can be beneficial to health and financial resources [42]. *Parental status in*  
56  
57  
58  
59  
60

1  
2  
3 2007, was coded as 0 for those having children and as 1 for the childless. *Marital status in*  
4  
5 2007 was measured with one question: 'Are you married or co-habiting?' Yes was coded as 0  
6  
7 and no as 1.  
8  
9

10 More women than men have poor LMA in terms of temporary employment. [43] Gender has  
11  
12 been considered as an important factor in relation to poor LMA and illness, where women's  
13  
14 health might be at greater risk. [44] *Women* were coded as 0 and *Men* as one.  
15  
16

### 17 18 **Statistics**

19  
20 The participants were clustered according to the development of their LMA over the 12 years  
21  
22 applying trajectory analysis.[23] The method has been established as a way of studying  
23  
24 individual developmental courses over age or time, and for identifying distinctive groups of  
25  
26 individual trajectories within the population that emerge, instead of predefined criteria, from  
27  
28 the data itself. Trajectory analysis consists of three steps. First, the appropriate probabilistic  
29  
30 model is chosen for the response variable. Second step is to define degree of the polynomial  
31  
32 form of the trajectories. Finally, the number of the clusters is decided, employing the  
33  
34 statistical information criteria and the 'common sense criteria' with respect to the substance  
35  
36 and aims of the study. As a result, the developmental trajectories within clusters are as similar  
37  
38 as possible, and trajectories between clusters are as different as possible.[45] At individual  
39  
40 level, cluster membership is dictated by the highest calculated posterior probability of  
41  
42 belonging to a particular cluster.  
43  
44  
45  
46  
47  
48  
49  
50

51 Trajectory analyses were conducted with Mplus program package. The analysis allowed for  
52  
53 12 time points, and the first and the second half of every second year were chosen in order to  
54  
55 take into account possible systematic seasonal variation of LMA.  
56  
57  
58  
59  
60

1  
2  
3  
4  
5  
6 We used logistic regression (odds ratio and 95% CI) to test whether LMA history was  
7  
8 associated with non-optimal self-rated health and psychological distress at age 42.  
9  
10 Adjustments were made for the health indicator at age 30, gender, socioeconomic position,  
11  
12 parental status and marital status. SPSS v17 was used for the regression analyses. Women and  
13  
14 men were analysed together to preserve power.  
15  
16  
17  
18  
19

## 20 21 **RESULTS**

22  
23 The data consists of 10 class ordinal indicator of LMA, and the form of probability  
24  
25 distribution of longitudinal sequence of measurement for such variable is the multinomial  
26  
27 distribution.  
28  
29  
30  
31  
32  
33

34 The adjusted Bayesian information criterion (BIC) value decreased from 17435.474 for the  
35  
36 linear model to 16656.622 for the quadratic polynomial model, indicating that the latter can  
37  
38 be preferred over the former. Other information criteria provided by the Mplus program as  
39  
40 well pointed in the same direction.  
41  
42  
43  
44  
45  
46

47 Optimal number of trajectories was searched by checking the solutions up to nine. The  
48  
49 adjusted Bayesian information criterion (adj. BIC) was used for choosing the solution.[46]  
50  
51 The Adj. BIC value (as well as the other information criteria) decreased when the number of  
52  
53 trajectories was increased, rapidly in the beginning and slower in the end. From seven-  
54  
55 trajectory to eight-trajectory solution the figure decreased from 17856.940 to 17606.402.  
56  
57  
58  
59  
60

Thereafter the decrease slowed down. We decided to continue with eight trajectories, as this solution provided, in addition to detailed depiction of differential LMA, the opportunity to exclude the cluster with zero LMA that was out of our research interest.

Figure 1 illustrates the ‘labour market tracks’ based on means of the LMA scores at each time point of the individuals classified into each trajectory. Individuals on track 1 (3% of the cohort) also were excluded, as they were mainly disability pension recipients and their health was poor by definition. The track of ‘permanent’ employment throughout the follow-up included more than half of the cohort, whereas the remaining six clusters were relatively small and there were relatively similar tracks. We collapsed these six clusters into three as follows. A considerable part (tracks 2 and 3) maintained a continuously ‘high level’ of attachment, and about 12% (tracks 5 and 7) displayed a ‘strengthening’ of attachment towards the end of the follow-up. The attachment was permanently weak in about one of 10 (track 8), and a small cluster with a U-shaped pattern (track 4) was also seen; we decided to collapse these clusters and defined their attachment as ‘poor’. In addition to being substantially grounded, this collapsing provided statistical power for subsequent analyses. Thus, we arrived at a four class ‘LMA history’ variable that comprised ‘permanent’, ‘high level’, ‘strengthening’ and ‘poor’ LMA (Figure 2).

(Figure 1 here)

Table 1. Distribution (%) of dependent and independent variables in relation to LMA history. All values are displayed in %, except p-values.

|                               | n=550     | n=163      | n=126         | n=130 | P-value          |
|-------------------------------|-----------|------------|---------------|-------|------------------|
|                               | Permanent | High level | Strengthening | Poor  | ( $\chi^2$ test) |
| Track                         | 0         | 1          | 2             | 3     |                  |
| Dependent variables age 42    |           |            |               |       |                  |
| Psychological distress        | 26.3      | 35.7       | 41.0          | 52.8  | <0.001           |
| Non-optimal self-rated health | 29.1      | 36.2       | 39.2          | 48.1  | <0.001           |

| Independent variables         |      |      |      |      |        |
|-------------------------------|------|------|------|------|--------|
| Health status at age 30       |      |      |      |      |        |
| Psychological distress        | 19.4 | 27.3 | 36.3 | 31.9 | <0.001 |
| Non-optimal self-rated health | 16.8 | 29.4 | 26.6 | 33.3 | <0.001 |
| Sociodemographics             |      |      |      |      |        |
| Blue-collar worker            | 33.5 | 25.8 | 35.7 | 47.7 | <0.001 |
| Lower white-collar worker     | 15.7 | 8.0  | 18.3 | 6.2  |        |
| Upper white-collar worker     | 50.8 | 66.3 | 46.0 | 46.2 |        |
| Single marital status         |      |      |      |      |        |
| No child as parental status   | 19.1 | 20.9 | 22.2 | 32.6 | 0.010  |
| Women                         | 17.3 | 16.6 | 15.1 | 19.4 | 0.831  |
| Women                         | 44.5 | 42.3 | 61.9 | 55.4 | 0.001  |

Table 1 shows the distribution of the key variables by LMA history. In general, LMA history with less strong attachment entailed poorer health at age 42. Concerning covariates, similar patterns were seen for psychological distress and non-optimal self-rated health at age 30, thus indicating that health status differed between LMA history already at baseline. There were also significant differences with regard to socioeconomic position; the proportion of blue-collar workers was highest in the group with poor attachment to the labour market. The poor attachment group was also most likely to be living without a partner ( $p=.010$ ). Parental status did not differ between the groups. The proportion of women was higher in strengthening and poor level attachment, whereas the permanent and high level attachment were dominated by men ( $p=.001$ ).

Table 2. Odds ratios (OR) and 95% confidence intervals (CI) for psychological distress and non-optimal self-rated health at age 42 as dependent variable for LMA history over 12 years as main exposure after adjustment for health status age 30, sociodemographic variables.

| Trajectories  |       | Psychological distress as outcome |                  |                  |                  |
|---------------|-------|-----------------------------------|------------------|------------------|------------------|
|               |       | Model 0                           | Model 1          | Model 2          | Model 3          |
| Permanent     | n=550 | 1                                 | 1                | 1                | 1                |
| High level    | n=163 | 1.55 (1.06–2.27)                  | 1.56 (1.06–2.30) | 1.50 (0.99–2.28) | 1.54 (1.01–2.35) |
| Strengthening | n=126 | 1.95 (1.29–2.93)                  | 1.77 (1.17–2.69) | 1.68 (1.07–2.66) | 1.57 (0.99–2.49) |
| Poor          | n=130 | 3.14 (2.10–4.70)                  | 2.77 (1.83–4.19) | 2.87 (1.83–4.49) | 2.52 (1.59–3.98) |

|                                          |       |                  |                  |                  |                  |
|------------------------------------------|-------|------------------|------------------|------------------|------------------|
| P-value for LMA                          |       | <0.001           | <0.001           | <0.001           | 0.001            |
| Non-optimal self-rated health as outcome |       |                  |                  |                  |                  |
| Trajectories                             |       |                  |                  |                  |                  |
|                                          |       | Model 0          | Model 1          | Model 2          | Model 3          |
| Permanent                                | n=550 | 1                | 1                | 1                | 1                |
| High level                               | n=163 | 1.38 (0.96–2.00) | 1.46 (1.00–2.13) | 1.19 (0.81–1.76) | 1.26 (0.85–1.87) |
| Strengthening                            | n=126 | 1.57 (1.05–2.36) | 1.52 (1.00–2.29) | 1.44 (0.94–2.20) | 1.40 (0.91–2.16) |
| Poor                                     | n=130 | 2.26 (1.53–3.34) | 2.00 (1.34–3.00) | 1.83 (1.21–2.77) | 1.65 (1.08–2.53) |
| P-value for LMA                          |       | <0.001           | 0.003            | 0.025            | 0.087            |

Model 0 crude odds ratios

Model 1 odds ratios adjusted for sociodemographic variables (socioeconomic position, gender, marital status and parental status).

Model 2 odds ratios adjusted for health status at age 30

Model 3 odds ratios adjusted for models 1+2.

To analyse whether LMA history was related to poor health, self-rated health and psychological distress were regressed on LMA history with permanent attachment as the reference category, in multiple logistic regression models (Table 2). The LMA history had a significant overall p-value on both health outcomes. In unadjusted analyses with psychological distress, lower strength of attachment involved higher odds than permanent (Table 2, Model 0; LMA history  $p < 0.001$ ). In model 0 we found increased OR in relation to lower attachment to the labour market, ranging from high level OR 1.55 (CI 1.06–2.27), strengthening OR 1.95 (CI 1.29–2.93), and poor OR 3.14 (CI 2.10–4.70). Adjusting for covariates (sociodemographic and psychological distress at age 30, Models 1 and 2, respectively) resulted in attenuation of the ORs for those with ‘strengthening’ and ‘poor’ attachment. Lastly, in the fully adjusted models (Model 3) only the high level and poor attachment were significantly related to psychological distress, with the ‘poorly’ attached displaying the numerically strongest association (OR=2.52 CI 1.59–3.98). Although borderline significant, the OR for the ‘strengthening’ (OR=1.57 CI 0.99–2.49) attachment was of comparable strength to the ‘high level’ attachment (OR=1.54 CI 1.01–2.35). While with a

1  
2  
3 slight decrease in OR along with adjustments for sociodemographic factors and previous  
4  
5 health, the same pattern is still evident in the final model, and the overall p value remained  
6  
7 highly significant ( $p=.001$ ).  
8  
9

10  
11  
12  
13 Results for non-optimal self-rated health were slightly less prominent than for psychological  
14  
15 distress but pointed in the same direction. Unadjusted models (Table 2, Model 0) showed a  
16  
17 significant overall relationship between LMA history and self-rated health ( $p<.001$ ), and the  
18  
19 LMA history with ‘strengthening’(OR= 1.57 CI 1.05–2.36) and ‘poor’(OR=2.26 CI 1.53–  
20  
21 3.34) attachment had higher odds of having non-optimal self-rated health. For those with  
22  
23 ‘high level’ (OR=1.38 CI 0.96–2.00) of attachment the risk was numerically higher, although  
24  
25 not significantly, than for those with ‘permanent’ attachment. After adjustment for health  
26  
27 status at age 30 (Model 2) the results for the ‘strengthening’ group were attenuated below  
28  
29 significance. In the final model, only the OR for the ‘poor’ attachment group was significantly  
30  
31 high, while the overall p-value for the association of LMA history with non-optimal health  
32  
33 dropped to borderline significance ( $p=.087$ ).  
34  
35  
36  
37  
38  
39  
40  
41

## 42 **DISCUSSION**

43  
44 In this study we have identified four tracks of LMA history over 12 years: permanent, high  
45  
46 level, strengthening and poor. Compared to the cohort with ‘permanent’ attachment, we found  
47  
48 a higher probability of psychological distress among three cohorts with non-permanent LMA.  
49  
50 The differences were partially attributed to previous health and to some extent also to  
51  
52 sociodemographic variables; nevertheless, the overall contribution of LMA history remained  
53  
54 significant in the fully adjusted model. The results for non-optimal self-rated health were  
55  
56 similar but somewhat weaker.  
57  
58  
59  
60



1  
2  
3  
4  
5  
6 Much of the previous research has suggested that temporary employment is a stepping stone  
7  
8 towards more stable employment.[47] In the present study we found that, although the greater  
9  
10 part of the sample already had a fairly strong attachment or were moving towards stronger  
11  
12 attachment, one track remained poorly attached to the labour market over the 12 years. Thus,  
13  
14 while the stepping stone hypothesis might be correct for the majority, a substantial minority  
15  
16 appear to be trapped in an employment situation of permanent temporariness. Further, we  
17  
18 found more women than men in this least favourable situation. This is probably explained by  
19  
20 the widespread use of ‘on-demand employment contracts’ in women-dominated sectors of  
21  
22 business[43] such as care and welfare and education [48] which are two industries which  
23  
24 together stands for 33% of all temporary contracts in Sweden[11]. These results can be  
25  
26 interpreted as, even Sweden is considered one of the top ranked gender equal countries, with  
27  
28 regard to high labour market participation among women, and the internal labour market is  
29  
30 still gender segregated.  
31  
32  
33  
34  
35  
36  
37  
38

39 Our findings importantly suggest that in addition to the present LMA, the LMA history is  
40  
41 important for health. In line with previous research we found that the group with least  
42  
43 attachment had the worst health status.[15, 17] As in our previous report showing a  
44  
45 cumulative effect of temporary employment on health status,[20] the present report further  
46  
47 corroborates that employment history impacts on health status. However, a more nuanced  
48  
49 picture emerged when the separate labour market tracks were considered.  
50  
51  
52  
53  
54

55 First, even those with ‘high level’ attachment experienced psychological distress more  
56  
57 commonly than those with ‘permanent’ attachment. Thus, it appears that even marginal  
58  
59  
60

1  
2  
3 exposure to what could be labelled 'LMA stress', can contribute to psychological distress  
4  
5 over time.  
6  
7

8  
9  
10  
11 Second, the group with 'strengthening' attachment, still experienced poor health more  
12 commonly than those with permanent attachment, even after adjustments for  
13 sociodemographic variables. This result suggests that earlier suboptimal attachment has a  
14 potentially 'scarring' effect. It is important to point out that in cross-sectional or short-term  
15 longitudinal designs, the 'strengthening' group would have been regarded as having a fairly  
16 favourable labour market attachment. This particular finding therefore stresses the importance  
17 of taking the specific patterns of the long-term labour market history into account when  
18 examining associations with health status.  
19  
20  
21  
22  
23  
24  
25  
26  
27

28  
29  
30 Third, among those poorly attached to the labour market is where we found the highest ORs  
31 for poor health. The poorly attached were also more likely to have other risk factors for  
32 psychological distress, which seemed to partly account for the association. For example, being  
33 single involves a lower average household income and decreases the level of control [49], and  
34 poor previous health could also contribute to difficulties getting a stable attachment to the  
35 labour market, as those with health troubles could be less employable, particularly for blue-  
36 collar occupations[50]. The poorly attached are also those with most experience of  
37 unemployment, which previously has been connected to mortality and morbidity[5, 51]. Thus,  
38 the poor mental health in this group seems to be a result not only of their enduringly  
39 unfavourable LMA history, but also of a range of coexisting burdensome life circumstances.  
40 As described in the introduction job insecurity, financial stress, lack of reciprocity, uncertainty,  
41 lack of autonomy are some of the broad range of potential pathways linking temporary  
42 employment to poor health in previous studies [9, 10, 15, 52-54]. Although mediating  
43  
44  
45  
46  
47  
48  
49  
50  
51  
52  
53  
54  
55  
56  
57  
58  
59  
60

1  
2  
3 mechanisms has not been within the scope of this paper, our results can understood in the  
4  
5 light of potential pathways presented in previous research.  
6  
7  
8  
9

### 10 11 **Methodological considerations** 12

13  
14 Our study relies on trajectory analysis, a method that became available in the beginning of the  
15  
16 2000s, largely by virtue of increased computing power. Instead of prefixing alternative  
17  
18 developments, the analysis is seeking developmental trajectories that emerge from the data  
19  
20 itself [17]. It gives each individual posterior probability values for each trajectory, and  
21  
22 allocates them according to the highest probability into groups or categories so that  
23  
24 individuals within a group are more similar than individuals between groups [55]. To our  
25  
26 knowledge, trajectory analysis has been used only sparsely in previous studies about  
27  
28 LMA.[56] Our previous research using a core-periphery structure has only yielded a measure  
29  
30 summarizing the total accumulation of peripheral employment over 12-years[20], this study  
31  
32 has added new knowledge to the field by showing when exposure is taking place and provided  
33  
34 patterns of labour market history, this specific knowledge has hinted about potential scaring  
35  
36 effects of poor LMA (seen in the strengthening group) which is a knowledge previously  
37  
38 hidden due to methodological limitations. In general, this study represents novel  
39  
40 methodological ideas in a research area that has been obscured by the practice of measuring  
41  
42 the labour market position cross-sectionally or with short-term transitions between labour  
43  
44 market positions.  
45  
46  
47  
48  
49

50  
51  
52 The longitudinal design of this study has been an asset, as it made it possible to adjust for  
53  
54 previous health and thereby reduced the possibility of reverse causation, and especially as the  
55  
56 attrition rate was kept low. Concerning the generalisability of this study, this cohort has been  
57  
58  
59  
60

1  
2  
3 shown by a previous assessment to be representative of Sweden as a whole concerning  
4 demographic data.[24] It is plausible that health effects of poor labour market attachment  
5 operate depending on the social context. E.g. that health implications might be more or less  
6 evident depending on structural factors such as national labour market policies, education  
7 system and legislation.[57] Sweden is part of the Scandinavian welfare regimes which are  
8 considered to have strong Social Democratic values and government funded benefits during  
9 episodes of unemployment. The welfare state Sweden could therefore possibly reduce  
10 negative health effects of flexible employment,[58] which is in contrast to the results in our  
11 study. However, Swedish unions have criticised the current labour market regulations for being  
12 too liberal regarding temporary employment. With current regulation it's possible to hire a  
13 substitute for up to two years and after that hire the same person on a general temporary  
14 employment contract for up to two years, this causes a situation where people are at risk of  
15 becoming long term temporary.[59] As a result of this approximately 10% of all temporary  
16 employees have been employed by the same employer for 5 years or more. The Swedish labour  
17 market regulation could therefore be a reason for the noticeable finding in this study; where a  
18 substantial part of the workers followed remained poorly attached over the 12 years which  
19 was examined. Long term temporary employment could be a future problem, and also a  
20 relevant group to study further in future research.

21  
22  
23  
24  
25  
26  
27  
28  
29  
30  
31  
32  
33  
34  
35  
36  
37  
38  
39  
40  
41  
42  
43  
44  
45  
46  
47 Sample size was limited in this study which is pointing to potential future research, which  
48 would benefit from analysing datasets with a larger sample size, such studies would be able to  
49 stratify analysis on gender or socioeconomic position, this could enrich the understanding of  
50 the field of LMA and illness. In this study we have focused on poor LMA as a risk factor for  
51 poor health, there are however a range of other circumstances that relate to precarious  
52 employment which could explain the results, such as vulnerability, lack of benefits, low  
53  
54  
55  
56  
57  
58  
59  
60

1  
2  
3 wages, disempowerment[44]. Therefore we would recommend future research to elaborate on  
4  
5 other aspects of precariousness linked to poor LMA, as well as exploring the validity of the  
6  
7 phenomena in a different context, e.g. country with different social and labour policies.  
8  
9

10  
11  
12 This study is based on self-reported data. Equivalent measures of self-rated health and  
13  
14 psychological distress have displayed good validity by predicting future mortality and  
15  
16 morbidity[60] even after adjustments for known health risks.[61] Furthermore, using  
17  
18 retrospective measurement of LMA history could lead to recall bias. Nevertheless,  
19  
20 retrospective questions about occupational history have been shown to maintain good quality  
21  
22 in terms of agreement with census data.[62]  
23  
24  
25  
26  
27  
28

29 Further, the fact that we combined tracks could be seen as a limitation of this study. However,  
30  
31 in our understanding some of the tracks could be combined depending on their similar  
32  
33 movement in the labour market. We first analysed each of the eight tracks separately in  
34  
35 relation to the outcome, to make sure that none of combinations resulted in blurring of the  
36  
37 results (data not shown). One limitation regarding the method was that, due to features of the  
38  
39 program, only half of the time points (12 of 24 possible time points) could be included in the  
40  
41 trajectory analysis. However, we used the first and second half of every second year to reduce  
42  
43 the possibility of systematic error due to seasonal variations in employment status.  
44  
45  
46  
47  
48

49 The structure behind the conceptualisation of LMA needs consideration. The LMA structure  
50  
51 is based on the idea that there is a gradient in the labour market, with some positions being  
52  
53 more strongly attached to the labour market than others. We have used a modified version of  
54  
55 Aronsson's core-periphery model[32] to order the type of employment contract/situation,  
56  
57 from the most attached to the least attached to labour market. Our structure is indeed a  
58  
59  
60

1  
2  
3 simplification of a more complex reality; this should be considered when interpreting the  
4  
5 results. The LMA variable and socioeconomic position is partly overlapping as the group of  
6  
7 entrepreneurs both is part of the SEP classification and the LMA variable. This overlap could  
8  
9 cause over adjustment in the logistic regression analysis. As these two variables partly  
10  
11 measure the same phenomenon, adjusting for socioeconomic position could adjust part of the  
12  
13 true effect of LMA.  
14  
15  
16  
17  
18  
19  
20

## 21 **Conclusions**

22  
23 Policymakers frequently promote flexible employment contracts. However, this study shows  
24  
25 that those with the most favourable but long-term high level attachment suffer from worse  
26  
27 health than those permanently attached. Further, despite a development towards favourable  
28  
29 employment circumstances, health discrepancies can endure, suggesting a potentially  
30  
31 ‘scarring’ effect. Last, those poorly attached display the worst health situation, this partly due  
32  
33 to coexisting burdensome life circumstances. We firmly suggest that policymakers should  
34  
35 consider the results of this study and take responsibility for creating employment  
36  
37 opportunities suitable for maintaining a healthy working life, rather than promoting  
38  
39 employment contracts characterised by poor attachment to the labour market.  
40  
41  
42  
43  
44  
45  
46  
47  
48  
49  
50  
51  
52  
53  
54  
55  
56  
57  
58  
59  
60

## ACKNOWLEDGEMENT

Thanks to all the participants in the Northern Swedish Cohort. Liudmila Lipiäinen and Tapio Nummi are thanked for contributing to this paper with regard to the trajectory analysis.

## CONTRIBUTORSHIP STATEMENT

AH, PEG, PV and AW have substantially contributions to conception and design. AW and PEG have contributed to analysis and interpretation of data. AW, AH, PV and PEG have drafted the article and revising it critically for important intellectual content. All authors have given their final approval of the version to be published.

## FUNDING

This work was supported by Swedish Council for Working Life and Social Research [2006-0950] the Medical Faculty at Umeå University and the Academy of Finland [grant number 132668 to PV]. The study has been financed by Formas dnr 259-2012-37.

## DATA SHARING STATEMENT

See Hammarström and Janlert [24] for details of the NSC data and procedures. The Northern Swedish Cohort is conducted at Umeå University. The dataset is not freely available, and researchers interested in collaboration should get into contact with the Principal Investigator, Anne Hammarström.

## COMPETING INTERESTS

None declared.

**REFERENCES**

- 1 OECD. Labour and Social Affairs. Incidence of temporary employment.: OECD  
2  
3  
4  
5  
6  
7 Online OECD Employment database [cited 12 December 2012, available at  
8  
9  
10  
11  
12  
13  
14  
15  
16  
17  
18  
19  
20  
21  
22  
23  
24  
25  
26  
27  
28  
29  
30  
31  
32  
33  
34  
35  
36  
37  
38  
39  
40  
41  
42  
43  
44  
45  
46  
47  
48  
49  
50  
51  
52  
53  
54  
55  
56  
57  
58  
59  
60
- 1 OECD. Labour and Social Affairs. Incidence of temporary employment.: OECD  
Online OECD Employment database [cited 12 December 2012, available at  
[www.oecd.org/employment/database](http://www.oecd.org/employment/database)  
2012.
- 2 Virtanen P, Lipiäinen L, Hammarström A, *et al.* Tracks of labour market attachment in  
early middle age: A trajectory analysis over 12 years. *Adv Life Course Res* 2011;**16**:55-64.
- 3 Furåker B, Berglund T. Changes of Employer, Employment Protection Legislation and  
Labour Market Attachment. *6:th Conference in Memory of Professor Marco Biagi*. Modena,  
Italy 2008.
- 4 Department for Transport. Data Sources for the Appraisal of Regeneration Impacts:  
TAG Unit 3.5.13 [accessed 18th Nov 2013 available at:  
<http://www.dft.gov.uk/webtag/documents/expert/pdf/unit3.5.13.pdf>]. Government of the  
United Kingdom 2011.
- 5 Dooley D, Fielding J, Levi L. Health and unemployment. *Anu Rev Publ Health*  
1996;**17**:449-65.
- 6 Hammarström A. Youth unemployment and ill health: results from a two-year follow-  
up study [in Swedish, summary in English]. Solna: Karolinska Institutet 1986.
- 7 McKee-Ryan FM, Song ZL, Wanberg CR, *et al.* Psychological and physical well-  
being during unemployment: A meta-analytic study. *J Appl Psychol* 2005;**90**:53-76.
- 8 Brenner H, Ahern W. Sickness absence and early retirement on health grounds in the  
construction industry in Ireland. *Occup Environ Med* 2000;**57**:615-20.



- 1  
2  
3 9 Mauno S, De Cuyper N, Kinnunen U, *et al.* Work characteristics in long-term  
4 temporary workers and temporary-to-permanent workers: A prospective study among Finnish  
5 health care personnel. *Econ Ind Democracy* 2012;**33**:357-77.  
6  
7  
8  
9  
10 10 Waenerlund AK, Virtanen P, Hammarström A. Is temporary employment related to  
11 health status? Analysis of the Northern Swedish Cohort. *Scand J Public Health* 2011;**39**:533-  
12 9.  
13  
14  
15 11 Waenerlund A-K. Temporary employment and illness. *Department of Public Health*  
16 *and Clinical medicine*. Umeå: Umeå University 2013.  
17  
18  
19  
20 12 Aronsson G, Dallner M, Lindh T, *et al.* Flexible pay but fixed expenses: Personal  
21 financial strain among on-call employees. *Int J Health Serv* 2005;**35**:499-28.  
22  
23  
24 13 Parker SK, Griffin MA, Sprigg CA, *et al.* Effect of temporary contracts on perceived  
25 work characteristics and job strain: A longitudinal study. *Pers Psychol* 2002;**55**:689-719.  
26  
27  
28  
29 14 Ferrie JE, Westerlund H, Virtanen M, *et al.* Flexible labor markets and employee  
30 health. *Scand J Work Environ Health* 2008:98-10.  
31  
32  
33  
34 15 Kim MH, Kim CY, Park JK, *et al.* Is precarious employment damaging to self-rated  
35 health? Results of propensity score matching methods, using longitudinal data in South  
36 Korea. *Soc Sci Med* 2008;**67**:1982-94.  
37  
38  
39  
40 16 Virtanen P, Vahtera J, Kivimaki M, *et al.* Employment security and health. *J*  
41 *Epidemiol Community Health* 2002;**56**:569-74.  
42  
43  
44  
45 17 Virtanen P, Liukkonen V, Vahtera J, *et al.* Health inequalities in the workforce: the  
46 labour market core-periphery structure. *Int J Epidemiol* 2003;**32**:1015-21.  
47  
48  
49  
50 18 Bardasi E, Francesconi M. The impact of atypical employment on individual  
51 wellbeing: evidence from a panel of British workers. *Soc Sci Med* 2004;**58**:1671-88.  
52  
53  
54 19 Virtanen P, Vahtera J, Kivimaki M, *et al.* Labor market trajectories and health: a four-  
55 year follow-up study of initially fixed-term employees. *Am J Epidemiol* 2005;**161**:840-46.  
56  
57  
58  
59  
60

- 1  
2  
3 20 Waenerlund AK, Gustafsson PE, Virtanen P, *et al.* Is the core-periphery labour market  
4 structure related to perceived health? findings of the Northern Swedish Cohort. *BMC Public*  
5 *Health* 2011;**11**:10.  
6  
7  
8  
9  
10 21 Broughton A, Biletta I, Kullander M. Flexible forms of work: 'very atypical'  
11 contractual arrangements. European Foundation for the Improvement of Living and Working  
12 Conditions 2010.  
13  
14  
15  
16 22 Liukkonen V, Virtanen P, Vahtera J, *et al.* Employment trajectories and changes in  
17 sense of coherence. *Eur J Public Health* 2010;**20**:293-8.  
18  
19  
20  
21 23 Nagin DS. Analyzing developmental trajectories: A semiparametric, group-based  
22 approach. *Psychol Methods* 1999;**4**:139-57.  
23  
24  
25 24 Hammarström A, Janlert U. Cohort Profile: The Northern Swedish Cohort. *Int J*  
26 *Epidemiol* 2011.  
27  
28  
29  
30 25 Jones SRG, Riddell WC. Unemployment and nonemployment: Heterogeneities in  
31 labor market states. *Rev Econ Stat* 2006;**88**:314-23.  
32  
33  
34 26 Grzywacz JG, Dooley D. "Good jobs" to "bad jobs": replicated evidence of an  
35 employment continuum from two large surveys. *Soc Sci Med* 2003;**56**:1749-60.  
36  
37  
38 27 Furåker B, & Berglund, T. *Changes of Employer, Employment Protection and Labour*  
39 *Market Attachment: An Analysis of Swedish Data from 1972-1998*. Gothenburg: University of  
40 Gothenburg 2008.  
41  
42  
43  
44 28 Laux R. Measuring labour market attachment using the Labour Force Survey. *Labour*  
45 *market trends [1361-4819]* 1997;**105 (10)**:407 (8).  
46  
47  
48  
49 29 Rousseau D, ed. *Psychological contracts in organizations: Understanding written and*  
50 *unwritten agreements*. Thousand Oaks, CA: Sage 1995.  
51  
52  
53  
54 30 Meyer J, Paunonen S., Gellatly I., & Goffin R. . Organizational commitment and job  
55 performance: It's the nature of commitment that counts. *J Appl Psychol* 1989;**74**:152-6.  
56  
57  
58  
59  
60

- 1  
2  
3 31 Greenhalgh L, Rosenblatt Z. Job insecurity: Toward conceptual clarity. *Acad Manage*  
4 *Rev* 1984;**9**:438-48.  
5  
6  
7 32 Aronsson G, Gustafsson K, Dallner M. Forms of employment, work environment and  
8 health in to a centre - periphery perspective. *Arbete och Hälsa (Work and Health)*. Stockholm:  
9 National Institute for Working Life 2000.  
10  
11  
12  
13 33 Statistics Sweden. Undersökning om levnadsförhållande [In English: Survey of living  
14 conditions]. Stockholm: Statistics Sweden 1980.  
15  
16  
17  
18 34 Hammarström A, Virtanen P, Janlert U. Are the health consequences of temporary  
19 employment worse among low educated than among high educated? *Eur J Public Health*  
20 2010.  
21  
22  
23  
24  
25 35 Siegrist J, Marmot M. Health inequalities and the psychosocial environment - two  
26 scientific challenges. *Soc Sci Med* 2004;**58**:1463-73.  
27  
28  
29 36 Black D, Morris JN, Townsend P, *et al*. Inequalities in Health. Report of a research  
30 working group. London: Department of Health and Social Security 1980.  
31  
32  
33  
34 37 Marmot M, Allen J, Goldblatt P, *et al*. Fair society, healthy lives: Strategic review of  
35 health inequalities in England post-2010 (the Marmot review). London: UCL 2010.  
36  
37  
38 38 Lynch J, Kaplan G. Socioeconomic Position. In: Berkman LF, Kawachi I, eds. *Social*  
39 *Epidemiology*. New York: Oxford University Press 2000:13-35.  
40  
41  
42  
43 39 Artazcoz L, Benach J, Borrell C, *et al*. Social inequalities in the impact of flexible  
44 employment on different domains of psychosocial health. *J Epidemiol Community Health*  
45 2005;**59**:761-67.  
46  
47  
48  
49 40 Statistics Sweden. Socioekonomisk indelning (SEI). Meddelande i samordningsfrågor  
50 1982:4 (Swedish Socioeconomic Classification). Stockholm: Statistics Sweden 1983.  
51  
52  
53  
54 41 Golsch K. Employment flexibility in Spain and its impact on transitions to adulthood.  
55 *Work Employ Soc* 2003;**17**:691-718.  
56  
57  
58  
59  
60

- 1  
2  
3 42 Waldron I, Weiss CC, Hughes ME. Interacting effects of multiple roles on women's  
4 health. *J Health Soc Behav* 1998;**39**:216-36.  
5  
6  
7 43 Aronsson G, Gustafsson K, Dallner M. Work environment and health in different  
8 types of temporary jobs. *Eur J Work Organ Psy* 2002;**11**:151-75.  
9  
10  
11 44 Vives A, Amable M, Ferrer M, *et al.* Employment Precariousness and Poor Mental  
12 Health: Evidence from Spain on a New Social Determinant of Health. *Journal of*  
13 *Environmental and Public Health [Epub 2013 Feb 3]* In press.  
14  
15  
16  
17  
18 45 Muthén B, & Muthén, L. . Integrating person-centered and variable-centered analyses:  
19 Growth mixture modeling with latent trajectory classes. *Alcohol Clin Exp Res* 2000;**24**:882-  
20  
21  
22  
23 91.  
24  
25 46 Tolvanen A. Latent growth mixture modelling: A simulation study. *Department of*  
26 *Mathematics and Statistics*. Finland: University of Jyväskylä 2007.  
27  
28  
29 47 Cockx B, Picchio M. Are Short-lived Jobs Stepping Stones to Long-Lasting Jobs? *Oxf*  
30 *Bull Econ Stat* 2012;**74**:646-75.  
31  
32  
33  
34 48 Statistics Sweden. Women and men in Sweden 2012. Örebro: Statistics Sweden 2012.  
35  
36 49 Mirowsky J, Ross C. *Social Causes of Psychological Distress*. New York: Aldine De  
37 Gruyter 2003.  
38  
39  
40 50 Strully KW. Job loss and health in the US labour market. *Demography* 2009;**46**:221-  
41  
42  
43 46.  
44  
45 51 Bartley M. Unemployment and Ill Health - Understanding the Relationship. *J*  
46 *Epidemiol Community Health* 1994;**48**:333-7.  
47  
48  
49 52 Ferrie JE. Is job insecurity harmful to health? *J R Soc Med* 2001;**94**:71-6.  
50  
51  
52 53 Tompa E, Scott-Marshall H, Dolinschi R, *et al.* Precarious employment experiences  
53 and their health consequences: towards a  
54  
55  
56 theoretical framework. *Work* 2007;**28**:209-24.  
57  
58  
59  
60

- 1  
2  
3 54 Facey ME, Eakin JM. Contingent work and ill-health: Conceptualizing the links. *Soc*  
4  
5 *Theory Health*;8:326-49.  
6  
7 55 Jung T, Wickrama KAS. An Introduction to Latent Class Growth Analysis and  
8  
9 Growth Mixture Modeling. *Social and Personality Psychology Compass* 2008;2:302-17.  
10  
11 56 Hynes K, Clarkberg M. Women's employment patterns during early parenthood: A  
12  
13 group-based trajectory analysis. *J Marriage Fam* 2005;67:222-39.  
14  
15 57 Guest DE, Isaksson K, De Witte H, eds. *Employment contracts, psychological*  
16  
17 *contracts, and worker well-being: an international study*. Oxford: Oxford University Press  
18  
19 2010.  
20  
21 58 Kim IH, Muntaner C, Shahidi FV, *et al*. Welfare states, flexible employment, and  
22  
23 health: A critical review. *Health Policy* 2012;104:99-127.  
24  
25 59 TCO. Additional comment from TCO regarding infringement procedure 2007/4835  
26  
27 against Sweden. Stockholm The Swedish Confederation for professional employees  
28  
29 [http://www.tco.se/Documents/Additionalcomments.pdf] 2013.  
30  
31 60 Weitoft GR, Rosén M. Is perceived nervousness and anxiety a predictor of premature  
32  
33 mortality and severe morbidity? A longitudinal follow up of the Swedish survey of living  
34  
35 conditions. *J Epidemiol Community Health* 2005;59:794-8.  
36  
37 61 Idler EL, Benyamini Y. Self-rated health and mortality: a review of twenty-seven  
38  
39 community studies. *J Health Soc Behav* 1997;38:21-37.  
40  
41 62 Wärneryd B, Thorslund M, Östlin P. The quality of retrospective questions about  
42  
43 occupational history--a comparison between survey and census data. *Scand J Soc Med*  
44  
45 1991;19:7-13.  
46  
47  
48  
49  
50  
51  
52  
53  
54  
55  
56  
57  
58  
59  
60

1  
2  
3  
4  
5  
6  
7  
8  
9  
10  
11  
12  
13  
14  
15  
16  
17  
18  
19  
20  
21  
22  
23  
24  
25  
26  
27  
28  
29  
30  
31  
32  
33  
34  
35  
36  
37  
38  
39  
40  
41  
42  
43  
44  
45  
46  
47  
48  
49  
50  
51  
52  
53  
54  
55  
56  
57  
58  
59  
60

Figure 1. The number of cohort members clustered by trajectory analysis into eight tracks (curves based on means of the attachment at the time points).

Figure 2. Collapsed tracks of labour market attachment history. Permanent, high level, strengthening and poor attachment.

For peer review only

1  
2  
3  
4  
5 **History of labour market attachment as determinant of the health status: a**  
6 **12-year follow-up of the Northern Swedish Cohort**  
7  
8  
9

10  
11  
12 ANNA-KARIN WAENERLUND<sup>1</sup>, PER E GUSTAFSSON<sup>1</sup>, ANNE HAMMARSTRÖM<sup>1</sup>,  
13  
14 PEKKA VIRTANEN<sup>2,3</sup>  
15  
16  
17  
18  
19

20  
21 <sup>1</sup>Department of Public Health and Clinical Medicine, Family Medicine, Umeå University,  
22  
23 Umeå, Sweden.  
24

25  
26 <sup>2</sup>School of Health Sciences and Institute for Advanced Social Research, University of  
27  
28 Tampere, Finland.  
29

30  
31 <sup>3</sup> Department of Public Health and Clinical Medicine, Epidemiology and Global Health,  
32  
33 Umeå University, Umeå, Sweden.  
34  
35  
36  
37  
38

39  
40 Correspondence: Anna-Karin Waenerlund, Department of Public Health and Clinical  
41  
42 Medicine, Umeå University, SE-901 85, Umeå, Sweden. Telephone: +46 90 785 35 81. Fax  
43  
44 number: +46 90 77 68 83  
45

46  
47 E-mail address: [annakarin.waenerlund@fammed.umu.se](mailto:annakarin.waenerlund@fammed.umu.se)  
48

49  
50 Word count: 5087  
51

52  
53 Keywords: public health, psychological distress, employment, cohort, health, trajectory  
54  
55 analysis.  
56  
57  
58  
59  
60

## ABSTRACT

**Objective:** The present study aims at using trajectory analysis to measure labour market attachment (LMA) over 12 years and at examining whether labour market tracks relate to perceived health status.

**Design:** Data were retrieved from a 26-year prospective cohort study, the Northern Swedish Cohort.

**Setting and participants:** All 9th grade students (n=1083) within the municipality of Luleå in northern Sweden were included in the baseline investigation in 1981. The vast majority (94%) of the original cohort participated at the fourth follow-up. In this study, 969 participants were included.

**Measures:** Perceived health status (psychological distress and non-optimal self-rated health) at age 42 and the data obtained from questionnaires.

**Results:** We have identified four tracks in relation to LMA across the 12-year period: 'permanent', 'high level', 'strengthening' and 'poor level' of attachment. LMA history relates to psychological distress. High level (OR 1.55 (1.06-2.27)), strengthening (OR 1.95 (1.29-2.93)) and poor attachment (OR 3.14 (2.10-4.70)) involve higher OR for psychological distress compared to permanent attachment. The overall p-value remained significant in the final model (0.001). Analyses regarding non-optimal self-rated health displayed a similar pattern but this was not significant in the final model.

**Conclusions:** Our results suggest that health status in mid-life, particularly psychological distress, is related to patterns of LMA history, to a large part independently of other social risk factors and previous health. Consideration of heterogeneity and time in labour market attachment might be important when analysing associations with perceived health.



### Main strengths

- Using longitudinal data with exceptionally high response-rate
- Applying trajectory analysis which only has previously been sparsely used in this field
- Provides a uniquely rich and detailed data on temporary contracts over a long period of time

### Limitations

- Relies on self-reported data
- Used a relatively small sample

## INTRODUCTION

During the last three decades or so, demands for a more flexible workforce have increased all over the world. Flexibility in the labour market is reflected, for example, in the proportion of temporary employees, which in recent years has varied between 13 and 15% of the total working population in Europe.[1] To the individual, the consequence of the flexible employment means that attachment to a workplace is weak and commonly interrupted by unemployment and other episodes out of work. In order to capture the total spectrum of employment relations, both with regard to quality and quantity, we have chosen to work with the concept of 'labour market attachment' (LMA) in this study. In our definition of the LMA spectra we have included permanent, non-permanent employment, unemployment and those who are exempted from working. [2-4]

1  
2  
3 Some relations between labour market status and health status are widely accepted: permanent  
4 employment is considered beneficial to health, while unemployment is known to have adverse  
5 health effects[5-7] and being out of the labour market in the long term is commonly due to  
6 poor health.[8] But when it comes to the health implications of labour market status, between  
7 the extremes of the LMA spectrum, the evidence is much scarcer. Previous studies has  
8 proposed that temporary employment could be a risk of poor psychosocial work  
9 characteristics[9] with temporary employees more commonly experiencing job insecurity and  
10 having a low cash margin [10], which are some of the factors that can be a potential pathways  
11 linking weak LMA to poor health. We have for example shown that long term temporary  
12 employees often experience difficulties to work full-time (underemployment) which  
13 influences their financial situation in a negative way [11]which can be a source of worry.[12]  
14 Poor health could also be mediated through job strain, although it seems as this group affected  
15 more by limited influence or control rather than high demands.[13] Moderate LMA has been  
16 highlighted as potentially harmful for health status, but research on the topic is divergent.[14]  
17 Whereas some studies report worse self-rated health among temporary employees,[15] a few  
18 studies even suggest better self-rated health among fixed-term employees.[16] Some studies  
19 also indicate that deterioration in self-rated health may not be observable until the attachment  
20 is quite weak.[17] A major answer to the mixed research results may lie in the inherent  
21 difficulty in capturing the changeable nature of employment. Measurement of the  
22 employment situation at one or a few points in time, as in most of the previous studies,[18,  
23 19] may overlook the factual exposures to different positions. Health effects of temporary  
24 employment could surface after several years of accumulation, as we have shown in a  
25 previous report,[20] or even when several years have passed after the exposure.[21]  
26 Moreover, it is possible that it is the chain of passages in different employments, the trajectory  
27 of LMA, that contributes to health status. E.g. becoming more strongly attached over time  
28  
29  
30  
31  
32  
33  
34  
35  
36  
37  
38  
39  
40  
41  
42  
43  
44  
45  
46  
47  
48  
49  
50  
51  
52  
53  
54  
55  
56  
57  
58  
59  
60

1  
2  
3 could contribute to health status differently than becoming less attached to the labour market  
4  
5 even if the both groups holds same total exposure.  
6  
7  
8  
9

10  
11 There are a lot of studies about particular labour market status as predictor of health. An  
12  
13 inherent problem of such studies is the amount of exposure: cross-sectional information of the  
14  
15 status includes great variation, a variable based on duration of the ongoing status is bound to  
16  
17 use cross-sectional health data, and in prospective follow-up settings there may be periods in  
18  
19 several statuses during the follow-up. The problem is of special importance in research of the  
20  
21 health effects of atypical employment, as there are a wide range of statuses between  
22  
23 permanent employment and overt unemployment. To address this topic, we have introduced a  
24  
25 score that sums up the exposure to different types of non-permanent employment during the  
26  
27 follow-up [20]. The score, however, does not take into account timing of the exposures. One  
28  
29 way to capture the status chains, or the passages in and the transitions between different  
30  
31 labour market positions, is provided by trajectory analysis. Applying this method with a four  
32  
33 class response variable (permanent employment, non-permanent employment, unemployment  
34  
35 and out of the labour force) the members of the Northern Swedish Cohort have been clustered  
36  
37 onto six different 'labour market attachment tracks'[2]. For the trajectory analysis of the  
38  
39 present study, labour market attachment was measured by a ten class indicator, in order to  
40  
41 articulate in more detail the trajectories of non-permanent employment and their association  
42  
43 with health.  
44  
45  
46  
47  
48  
49  
50  
51

52  
53 The few available studies about labour market trajectories in field of public health have  
54  
55 measured LMA in a few time points, e.g. between one time point to another[9] and the goal  
56  
57 has been descriptive rather than analytic.[19, 22] In the present study, we have applied a  
58  
59  
60

1  
2  
3 refined scale with regard to LMA. In the measure we have included a spectrum of types of  
4  
5 employment situations and also covered a time-span of 12 year. The method, trajectory  
6  
7 analysis[23], offers a novel way to identify differential tracks of LMA history in our  
8  
9 population cohort. After obtaining a relevant set of tracks, our aim is to examine in which  
10  
11 ways they relate to non-optimal self-rated health or perceived psychological distress.  
12  
13

## 14 15 16 **METHOD**

### 17 18 **Population and procedures**

19  
20  
21 The study was initiated in 1981 and included all pupils in their last year of compulsory school  
22  
23 (n=1083), in the medium-sized industrial town of Luleå in northern Sweden (95% of the  
24  
25 cohort were born in 1965). Since 1981 four additional follow-ups have been conducted.[24]  
26  
27

28 The attrition rate in the most recent follow-up from 2007 was low; 94% (n=1005) of the  
29  
30 original cohort who were still alive (n=1071) participated. Comprehensive questionnaires,  
31  
32 completed by the participants in 1981, 1983, 1986, 1995 and 2007, were used as the main  
33  
34 assessment method. This paper is based on data from the 1995 and 2007 follow-ups.  
35  
36

37 Procedures of data collection are described more extensively elsewhere.[24] The study was  
38  
39 approved by the Regional Ethical Review Board in Umeå, Sweden.  
40  
41  
42  
43  
44

### 45 46 **Measurements**

47  
48 LMA history

49  
50  
51 We name the response variable of the trajectory analysis as “labour market attachment”  
52  
53 (LMA). It aims to serve as a conceptual and empirical tool to sort out the employment statuses  
54  
55 of the post-industrial labour market into a continuum .[25, 26] Crudely, it “refers to whether  
56  
57 or not people have continuous employment (for example all year or only part of it) and  
58  
59  
60

1  
2  
3 whether or not they have periods of unemployment” [27] At headline level [28] there are four  
4  
5 major classes of LMA: non-employment, unemployment, temporary employment and  
6  
7 permanent employment. Within each class, several subclasses can be discerned. In the present  
8  
9 study, the interest focuses on differential temporary employment. Seen through LMA,  
10  
11 temporary employment covers a set of positions defined by formal job contracts, regardless of  
12  
13 the psychological contract, [29] job commitment [30] or perceived job insecurity.[31]  
14  
15  
16  
17  
18  
19

20 Participants’ labour market position from 1996 to 2007 was measured with a matrix  
21  
22 consisting of columns representing half-year periods and rows representing different labour  
23  
24 market positions. With the instruction ‘During which periods have you been employed  
25  
26 permanently or have had some type of temporary job contract or have been out of work?’ the  
27  
28 respondents were prompted to choose between 11 response options for each six-month period:  
29  
30 ‘permanently employed’ (coded as 10), ‘entrepreneur’ (9), ‘employed in project’ (8),  
31  
32 ‘substitute’ (7), ‘probationary employment’ (6), ‘on-demand worker’ (5), ‘seasonal worker’  
33  
34 (4), ‘temporary employee for other reasons’ (3), ‘in employment policy measure’ (2),  
35  
36 ‘unemployed’ (2), ‘out of the labour market’ (1). Unemployment and participation in policy  
37  
38 measure were merged, and each option was coded to a variable that expressed the strength of  
39  
40 LMA on a scale from 10 to 1. The ranking of contracts has been tested in previous research on  
41  
42 accumulation of temporary employment[20] and was based on Aronsson’s core-periphery  
43  
44 model [32]which proposes that there is a health gradient in relation to type of employment  
45  
46 contract. The model ranks contracts based on duration, possibility of on the job training,  
47  
48 autonomy, and job security.[32] However, we have extended the ranking by also include three  
49  
50 labour market positions of non-employment. In the event of ‘out of labour market’, a  
51  
52 continuum of five or more periods (i.e. 2.5 years) was required: if there were fewer than five,  
53  
54 all periods were coded according to the last labour market position, to purposely exclude  
55  
56  
57  
58  
59  
60

1  
2  
3 those on parental leave or studying from this category. As the last category ‘out of labour  
4  
5 market’ was given the lowest score in relation to LMA. The intention for this group was that  
6  
7 it was suppose to be contained by those mainly on sickness benefit (supported by analysis,  
8  
9 data not shown), not those temporarily not working due to parental leave or education). These  
10  
11 operations thus yielded a score of the strength of LMA for each of the 24 successive half-year  
12  
13 periods. The scores served as the data for the trajectory analysis.  
14  
15  
16  
17  
18  
19

#### 20 Indicators of health status

21  
22  
23 *Psychological distress at age 30 and 42* was measured with a question that inquired whether  
24  
25 the respondent during the last year had experienced any of the following symptoms:  
26  
27 restlessness, concentration problems, being worried or anxious, palpitations, anxiety or panic  
28  
29 or other nervous problems. Reporting one or more of the six symptoms was coded as 1 and  
30  
31 none as 0, equalling a dichotomisation into the quartile with the most symptoms versus the  
32  
33 rest. The question was derived from the ‘Survey of living conditions’.[33]  
34  
35  
36  
37  
38  
39

40 *Non-optimal self-rated health at age 30 and 42*, was measured with one question, ‘How do  
41  
42 you rate your general health?’, with response options: good, average or bad.[33] The  
43  
44 responses were dichotomised into the quartile with the worst health (average or bad) coded as  
45  
46 1, and the rest (good) coded as 0.[10, 34]  
47  
48  
49  
50  
51  
52  
53  
54  
55  
56  
57  
58  
59  
60

## Covariates

Socio-economic position strong predictor of health [35-38]. LMA have been shown to be related to occupational class [39] it is important to consider socio-economic position as a possible confounder when studying the relationship between temporary employment and illness. In this study *Socioeconomic position (SEP) in 2007* was based on one question about occupation, which was classified according to the Swedish socioeconomic classification of occupational categories.[40] Upper white-collar and self-employed were coded as 0, lower white-collar workers were coded as 1 and blue-collar workers were coded as 2.

Also partnership and parenthood are important factors in relation to LMA as these two may be postponed due to insecure working arrangement [39, 41], which could influence social aspects related to illness [39]. Marriage or having a partner is also important to consider when studying LMA, as it can be beneficial to health and financial resources [42]. *Parental status in 2007*, was coded as 0 for those having children and as 1 for the childless. *Marital status in 2007* was measured with one question: 'Are you married or co-habiting?' Yes was coded as 0 and no as 1.

More women than men have poor LMA in terms of temporary employment. [43] Gender has been considered as an important factor in relation to poor LMA and illness, where women's health might be at greater risk. [44] *Women* were coded as 0 and *Men* as one.

## Statistics

The participants were clustered according to the development of their LMA over the 12 years applying trajectory analysis.[23] The method has been established as a way of studying individual developmental courses over age or time, and for identifying distinctive groups of individual trajectories within the population that emerge, instead of predefined criteria, from the data itself. Trajectory analysis consists of three steps. First, the appropriate probabilistic

1  
2  
3 model is chosen for the response variable. Second step is to define degree of the polynomial  
4  
5 form of the trajectories. Finally, the number of the clusters is decided, employing the  
6  
7 statistical information criteria and the 'common sense criteria' with respect to the substance  
8  
9 and aims of the study. As a result, the developmental trajectories within clusters are as similar  
10  
11 as possible, and trajectories between clusters are as different as possible.[45] At individual  
12  
13 level, cluster membership is dictated by the highest calculated posterior probability of  
14  
15 belonging to a particular cluster.  
16  
17  
18  
19  
20  
21

22 Trajectory analyses were conducted with Mplus program package. The analysis allowed for  
23  
24 12 time points, and the first and the second half of every second year were chosen in order to  
25  
26 take into account possible systematic seasonal variation of LMA.  
27  
28  
29  
30  
31  
32

33 We used logistic regression (odds ratio and 95% CI) to test whether LMA history was  
34  
35 associated with non-optimal self-rated health and psychological distress at age 42.  
36

37 Adjustments were made for the health indicator at age 30, gender, socioeconomic position,  
38  
39 parental status and marital status. SPSS v17 was used for the regression analyses. Women and  
40  
41 men were analysed together to preserve power.  
42  
43  
44  
45  
46  
47

## 48 RESULTS

49

50 The data consists of 10 class ordinal indicator of LMA, and the form of probability  
51  
52 distribution of longitudinal sequence of measurement for such variable is the multinomial  
53  
54 distribution.  
55  
56  
57  
58  
59  
60



1  
2  
3  
4  
5  
6 The adjusted Bayesian information criterion (BIC) value decreased from 17435.474 for the  
7  
8 linear model to 16656.622 for the quadratic polynomial model, indicating that the latter can  
9  
10 be preferred over the former. Other information criteria provided by the Mplus program as  
11  
12 well pointed in the same direction.  
13

14  
15  
16  
17  
18 Optimal number of trajectories was searched by checking the solutions up to nine. The  
19  
20 adjusted Bayesian information criterion (adj. BIC) was used for choosing the solution.[46]  
21  
22 The Adj. BIC value (as well as the other information criteria) decreased when the number of  
23  
24 trajectories was increased, rapidly in the beginning and slower in the end. From seven-  
25  
26 trajectory to eight-trajectory solution the figure decreased from 17856.940 to 17606.402.  
27  
28 Thereafter the decrease slowed down. We decided to continue with eight trajectories, as this  
29  
30 solution provided, in addition to detailed depiction of differential LMA, the opportunity to  
31  
32 exclude the cluster with zero LMA that was out of our research interest.  
33  
34  
35  
36  
37  
38  
39

40 Figure 1 illustrates the 'labour market tracks' based on means of the LMA scores at each time  
41  
42 point of the individuals classified into each trajectory. Individuals on track 1 (3% of the  
43  
44 cohort) also were excluded, as they were mainly disability pension recipients and their health  
45  
46 was poor by definition. The track of 'permanent' employment throughout the follow-up  
47  
48 included more than half of the cohort, whereas the remaining six clusters were relatively small  
49  
50 and there were relatively similar tracks. We collapsed these six clusters into three as follows.  
51  
52 A considerable part (tracks 2 and 3) maintained a continuously 'high level' of attachment, and  
53  
54 about 12% (tracks 5 and 7) displayed a 'strengthening' of attachment towards the end of the  
55  
56 follow-up. The attachment was permanently weak in about one of 10 (track 8), and a small  
57  
58  
59  
60

cluster with a U-shaped pattern (track 4) was also seen; we decided to collapse these clusters and defined their attachment as 'poor'. In addition to being substantially grounded, this collapsing provided statistical power for subsequent analyses. Thus, we arrived at a four class 'LMA history' variable that comprised 'permanent', 'high level', 'strengthening' and 'poor' LMA (Figure 2).

(Figure 1 here)

Table 1. Distribution (%) of dependent and independent variables in relation to LMA history. All values are displayed in %, except p-values.

|                               | n=550     | n=163      | n=126         | n=130 | P-value          |
|-------------------------------|-----------|------------|---------------|-------|------------------|
|                               | Permanent | High level | Strengthening | Poor  | ( $\chi^2$ test) |
| Track                         | 0         | 1          | 2             | 3     |                  |
| Dependent variables age 42    |           |            |               |       |                  |
| Psychological distress        | 26.3      | 35.7       | 41.0          | 52.8  | <0.001           |
| Non-optimal self-rated health | 29.1      | 36.2       | 39.2          | 48.1  | <0.001           |
| Independent variables         |           |            |               |       |                  |
| Health status at age 30       |           |            |               |       |                  |
| Psychological distress        | 19.4      | 27.3       | 36.3          | 31.9  | <0.001           |
| Non-optimal self-rated health | 16.8      | 29.4       | 26.6          | 33.3  | <0.001           |
| Sociodemographics             |           |            |               |       |                  |
| Blue-collar worker            | 33.5      | 25.8       | 35.7          | 47.7  | <0.001           |
| Lower white-collar worker     | 15.7      | 8.0        | 18.3          | 6.2   |                  |
| Upper white-collar worker     | 50.8      | 66.3       | 46.0          | 46.2  |                  |
| Single marital status         | 19.1      | 20.9       | 22.2          | 32.6  | 0.010            |
| No child as parental status   | 17.3      | 16.6       | 15.1          | 19.4  | 0.831            |
| Women                         | 44.5      | 42.3       | 61.9          | 55.4  | 0.001            |

Table 1 shows the distribution of the key variables by LMA history. In general, LMA history with less strong attachment entailed poorer health at age 42. Concerning covariates, similar patterns were seen for psychological distress and non-optimal self-rated health at age 30, thus indicating that health status differed between LMA history already at baseline. There were also significant differences with regard to socioeconomic position; the proportion of blue-

collar workers was highest in the group with poor attachment to the labour market. The poor attachment group was also most likely to be living without a partner ( $p=.010$ ). Parental status did not differ between the groups. The proportion of women was higher in strengthening and poor level attachment, whereas the permanent and high level attachment were dominated by men ( $p=.001$ ).

Table 2. Odds ratios (OR) and 95% confidence intervals (CI) for psychological distress and non-optimal self-rated health at age 42 as dependent variable for LMA history over 12 years as main exposure after adjustment for health status age 30, sociodemographic variables.

| Psychological distress as outcome        |       |                  |                  |                  |                  |
|------------------------------------------|-------|------------------|------------------|------------------|------------------|
| Trajectories                             |       | Model 0          | Model 1          | Model 2          | Model 3          |
| Permanent                                | n=550 | 1                | 1                | 1                | 1                |
| High level                               | n=163 | 1.55 (1.06–2.27) | 1.56 (1.06–2.30) | 1.50 (0.99–2.28) | 1.54 (1.01–2.35) |
| Strengthening                            | n=126 | 1.95 (1.29–2.93) | 1.77 (1.17–2.69) | 1.68 (1.07–2.66) | 1.57 (0.99–2.49) |
| Poor                                     | n=130 | 3.14 (2.10–4.70) | 2.77 (1.83–4.19) | 2.87 (1.83–4.49) | 2.52 (1.59–3.98) |
| P-value for LMA                          |       | <0.001           | <0.001           | <0.001           | 0.001            |
| Non-optimal self-rated health as outcome |       |                  |                  |                  |                  |
| Trajectories                             |       | Model 0          | Model 1          | Model 2          | Model 3          |
| Permanent                                | n=550 | 1                | 1                | 1                | 1                |
| High level                               | n=163 | 1.38 (0.96–2.00) | 1.46 (1.00–2.13) | 1.19 (0.81–1.76) | 1.26 (0.85–1.87) |
| Strengthening                            | n=126 | 1.57 (1.05–2.36) | 1.52 (1.00–2.29) | 1.44 (0.94–2.20) | 1.40 (0.91–2.16) |
| Poor                                     | n=130 | 2.26 (1.53–3.34) | 2.00 (1.34–3.00) | 1.83 (1.21–2.77) | 1.65 (1.08–2.53) |
| P-value for LMA                          |       | <0.001           | 0.003            | 0.025            | 0.087            |

Model 0 crude odds ratios

Model 1 odds ratios adjusted for sociodemographic variables (socioeconomic position, gender, marital status and parental status).

Model 2 odds ratios adjusted for health status at age 30

Model 3 odds ratios adjusted for models 1+2.

To analyse whether LMA history was related to poor health, self-rated health and psychological distress were regressed on LMA history with permanent attachment as the reference category, in multiple logistic regression models (Table 2). The LMA history had a significant overall p-value on both health outcomes. In unadjusted analyses with

1  
2  
3 psychological distress, lower strength of attachment involved higher odds than permanent  
4 (Table 2, Model 0; LMA history  $p < 0.001$ ). In model 0 we found increased OR in relation to  
5 lower attachment to the labour market, ranging from high level OR 1.55 (CI 1.06–2.27),  
6  
7 strengthening OR 1.95 (CI 1.29–2.93), and poor OR 3.14 (CI 2.10–4.70). Adjusting for  
8  
9 covariates (sociodemographic and psychological distress at age 30, Models 1 and 2,  
10  
11 respectively) resulted in attenuation of the ORs for those with ‘strengthening’ and ‘poor’  
12  
13 attachment. Lastly, in the fully adjusted models (Model 3) only the high level and poor  
14  
15 attachment were significantly related to psychological distress, with the ‘poorly’ attached  
16  
17 displaying the numerically strongest association (OR=2.52 CI 1.59–3.98). Although  
18  
19 borderline significant, the OR for the ‘strengthening’ (OR=1.57 CI 0.99–2.49) attachment was  
20  
21 of comparable strength to the ‘high level’ attachment (OR=1.54 CI 1.01–2.35). While with a  
22  
23 slight decrease in OR along with adjustments for sociodemographic factors and previous  
24  
25 health, the same pattern is still evident in the final model, and the overall p value remained  
26  
27 highly significant ( $p = .001$ ).  
28  
29  
30  
31  
32  
33  
34  
35  
36  
37

38 Results for non-optimal self-rated health were slightly less prominent than for psychological  
39  
40 distress but pointed in the same direction. Unadjusted models (Table 2, Model 0) showed a  
41  
42 significant overall relationship between LMA history and self-rated health ( $p < .001$ ), and the  
43  
44 LMA history with ‘strengthening’ (OR= 1.57 CI 1.05–2.36) and ‘poor’ (OR=2.26 CI 1.53–  
45  
46 3.34) attachment had higher odds of having non-optimal self-rated health. For those with  
47  
48 ‘high level’ (OR=1.38 CI 0.96–2.00) of attachment the risk was numerically higher, although  
49  
50 not significantly, than for those with ‘permanent’ attachment. After adjustment for health  
51  
52 status at age 30 (Model 2) the results for the ‘strengthening’ group were attenuated below  
53  
54 significance. In the final model, only the OR for the ‘poor’ attachment group was significantly  
55  
56  
57  
58  
59  
60

1  
2  
3 high, while the overall p-value for the association of LMA history with non-optimal health  
4  
5 dropped to borderline significance ( $p=.087$ ).  
6  
7  
8  
9

## 10 11 **DISCUSSION**

12  
13  
14 In this study we have identified four tracks of LMA history over 12 years: permanent, high  
15  
16 level, strengthening and poor. Compared to the cohort with 'permanent' attachment, we found  
17  
18 a higher probability of psychological distress among three cohorts with non-permanent LMA.  
19  
20 The differences were partially attributed to previous health and to some extent also to  
21  
22 sociodemographic variables; nevertheless, the overall contribution of LMA history remained  
23  
24 significant in the fully adjusted model. The results for non-optimal self-rated health were  
25  
26 similar but somewhat weaker.  
27  
28  
29  
30  
31  
32

33  
34 Much of the previous research has suggested that temporary employment is a stepping stone  
35  
36 towards more stable employment.[47] In the present study we found that, although the greater  
37  
38 part of the sample already had a fairly strong attachment or were moving towards stronger  
39  
40 attachment, one track remained poorly attached to the labour market over the 12 years. Thus,  
41  
42 while the stepping stone hypothesis might be correct for the majority, a substantial minority  
43  
44 appear to be trapped in an employment situation of permanent temporariness. Further, we  
45  
46 found more women than men in this least favourable situation. This is probably explained by  
47  
48 the widespread use of 'on-demand employment contracts' in women-dominated sectors of  
49  
50 business[43] such as care and welfare and education [48] **which are two industries which**  
51  
52 **together stands for 33% of all temporary contracts in Sweden[11]. These results can be**  
53  
54 **interpreted as, even Sweden is considered one of the top ranked gender equal countries, with**  
55  
56  
57  
58  
59  
60

1  
2  
3 regard to high labour market participation among women, and the internal labour market is  
4  
5 still gender segregated.  
6  
7  
8  
9

10  
11 Our findings importantly suggest that in addition to the present LMA, the LMA history is  
12 important for health. In line with previous research we found that the group with least  
13 attachment had the worst health status.[15, 17] As in our previous report showing a  
14 cumulative effect of temporary employment on health status,[20] the present report further  
15 corroborates that employment history impacts on health status. However, a more nuanced  
16 picture emerged when the separate labour market tracks were considered.  
17  
18  
19  
20  
21  
22  
23  
24  
25  
26  
27

28 First, even those with ‘high level’ attachment experienced psychological distress more  
29 commonly than those with ‘permanent’ attachment. Thus, it appears that even marginal  
30 exposure to what could be labelled ‘LMA stress’, can contribute to psychological distress  
31 over time.  
32  
33  
34  
35  
36  
37  
38  
39  
40

41 Second, the group with ‘strengthening’ attachment, still experienced poor health more  
42 commonly than those with permanent attachment, even after adjustments for  
43 sociodemographic variables. This result suggests that earlier suboptimal attachment has a  
44 potentially ‘scarring’ effect. It is important to point out that in cross-sectional or short-term  
45 longitudinal designs, the ‘strengthening’ group would have been regarded as having a fairly  
46 favourable labour market attachment. This particular finding therefore stresses the importance  
47 of taking the specific patterns of the long-term labour market history into account when  
48 examining associations with health status.  
49  
50  
51  
52  
53  
54  
55  
56  
57  
58  
59  
60

1  
2  
3 Third, among those poorly attached to the labour market is where we found the highest ORs  
4  
5 for poor health. The poorly attached were also more likely to have other risk factors for  
6  
7 psychological distress, which seemed to partly account for the association. For example, being  
8  
9 single involves a lower average household income and decreases the level of control [49], and  
10  
11 poor previous health could also contribute to difficulties getting a stable attachment to the  
12  
13 labour market, as those with health troubles could be less employable, particularly for blue-  
14  
15 collar occupations[50]. The poorly attached are also those with most experience of  
16  
17 unemployment, which previously has been connected to mortality and morbidity[5, 51]. Thus,  
18  
19 the poor mental health in this group seems to be a result not only of their enduringly  
20  
21 unfavourable LMA history, but also of a range of coexisting burdensome life circumstances.  
22  
23

24 As described in the introduction job insecurity, financial stress, lack of reciprocity, uncertainty,  
25  
26 lack of autonomy are some of the broad range of potential pathways linking temporary  
27  
28 employment to poor health in previous studies [9, 10, 15, 52-54]. Although mediating  
29  
30 mechanisms has not been within the scope of this paper, our results can be understood in the  
31  
32 light of potential pathways presented in previous research.  
33  
34  
35  
36  
37  
38  
39

### 40 **Methodological considerations**

41  
42  
43 Our study relies on trajectory analysis, a method that became available in the beginning of the  
44  
45 2000s, largely by virtue of increased computing power. Instead of prefixing alternative  
46  
47 developments, the analysis is seeking developmental trajectories that emerge from the data  
48  
49 itself [17]. It gives each individual posterior probability values for each trajectory, and  
50  
51 allocates them according to the highest probability into groups or categories so that  
52  
53 individuals within a group are more similar than individuals between groups [55]. To our  
54  
55 knowledge, trajectory analysis has been used only sparsely in previous studies about  
56  
57  
58  
59  
60

1  
2  
3 LMA.[56] Our previous research using a core-periphery structure has only yielded a measure  
4  
5 summarizing the total accumulation of peripheral employment over 12-years[20], this study  
6  
7 has added new knowledge to the field by showing when exposure is taking place and provided  
8  
9 patterns of labour market history, this specific knowledge has hinted about potential scaring  
10  
11 effects of poor LMA (seen in the strengthening group) which is a knowledge previously  
12  
13 hidden due to methodological limitations. In general, this study represents novel  
14  
15 methodological ideas in a research area that has been obscured by the practice of measuring  
16  
17 the labour market position cross-sectionally or with short-term transitions between labour  
18  
19 market positions.  
20  
21  
22  
23  
24

25 The longitudinal design of this study has been an asset, as it made it possible to adjust for  
26  
27 previous health and thereby reduced the possibility of reverse causation, and especially as the  
28  
29 attrition rate was kept low. Concerning the generalisability of this study, this cohort has been  
30  
31 shown by a previous assessment to be representative of Sweden as a whole concerning  
32  
33 demographic data.[24] It is plausible that health effects of poor labour market attachment  
34  
35 operate depending on the social context. E.g. that health implications might be more of less  
36  
37 evident depending on structural factors such as national labour market policies, education  
38  
39 system and legislation.[57] Sweden is part of the Scandinavian welfare regimes which are  
40  
41 considered to have strong Social Democratic values and government funded benefits during  
42  
43 episodes of unemployment. The welfare state Sweden could therefore possible reduce  
44  
45 negative health effects of flexible employment,[58] which is in contrast to the results in our  
46  
47 study. However, Swedish unions has criticised the current labour market regulations for being  
48  
49 too liberal regarding temporary employment. With current regulation it's possible hire a  
50  
51 substitute for up to two years and after that hire the same person on a general temporary  
52  
53 employment contract for up to two years, this causes a situation where people are at risk of  
54  
55  
56  
57  
58  
59  
60



1  
2  
3 becoming long term temporary.[59] As a result of this approximately 10% of all temporary  
4  
5 employees has been employed by the same employer for 5 years or more. The Swedish labour  
6  
7 market regulation could therefore be a reason to the noticeable finding in this study; where a  
8  
9 substantial part of the workers followed remained poorly attached over the 12 years which  
10  
11 was examined. Long term temporary employment could be a future problem, and also a  
12  
13 relevant group to study further in future research.  
14  
15  
16  
17  
18  
19

20 Sample size was limited in this study which is pointing to potential future research, which  
21  
22 would benefit from analysing datasets with a larger sample size, such studies would be able to  
23  
24 stratify analysis on gender or socioeconomic position, this could enrich the understanding of  
25  
26 the field of LMA and illness. In this study we have focused on poor LMA as a risk factor for  
27  
28 poor health, there are however a range of other circumstances the relates to precarious  
29  
30 employment which could explain the results, such as vulnerability, lack of benefits, low  
31  
32 wages, disempowerment[44]. Therefore we would recommend future research to elaborate on  
33  
34 other aspects of precariousness linked to poor LMA, as well as exploring the validity of the  
35  
36 phenomena in a different context, e.g. country with different social and labour policies.  
37  
38  
39  
40  
41  
42

43 This study is based on self-reported data. Equivalent measures of self-rated health and  
44  
45 psychological distress have displayed good validity by predicting future mortality and  
46  
47 morbidity[60] even after adjustments for known health risks.[61] Furthermore, using  
48  
49 retrospective measurement of LMA history could lead to recall bias. Nevertheless,  
50  
51 retrospective questions about occupational history have been shown to maintain good quality  
52  
53 in terms of agreement with census data.[62]  
54  
55  
56  
57  
58  
59  
60

1  
2  
3 Further, the fact that we combined tracks could be seen as a limitation of this study. However,  
4  
5 in our understanding some of the tracks could be combined depending on their similar  
6  
7 movement in the labour market. We first analysed each of the eight tracks separately in  
8  
9 relation to the outcome, to make sure that none of combinations resulted in blurring of the  
10  
11 results (data not shown). One limitation regarding the method was that, due to features of the  
12  
13 program, only half of the time points (12 of 24 possible time points) could be included in the  
14  
15 trajectory analysis. However, we used the first and second half of every second year to reduce  
16  
17 the possibility of systematic error due to seasonal variations in employment status.  
18  
19

20  
21  
22 The structure behind the conceptualisation of LMA needs consideration. The LMA structure  
23  
24 is based on the idea that there is a gradient in the labour market, with some positions being  
25  
26 more strongly attached to the labour market than others. We have used a modified version of  
27  
28 Aronsson's core-periphery model[32] to order the type of employment contract/situation,  
29  
30 from the most attached to the least attached to labour market. Our structure is indeed a  
31  
32 simplification of a more complex reality; this should be considered when interpreting the  
33  
34 results. The LMA variable and socioeconomic position is partly overlapping as the group of  
35  
36 entrepreneurs both is part of the SEP classification and the LMA variable. This overlap could  
37  
38 cause over adjustment in the logistic regression analysis. As these two variables partly  
39  
40 measure the same phenomenon, adjusting for socioeconomic position could adjust part of the  
41  
42 true effect of LMA.  
43  
44  
45  
46  
47  
48  
49  
50  
51

## 52 Conclusions

53  
54 Policymakers frequently promote flexible employment contracts. However, this study shows  
55  
56 that those with the most favourable but long-term high level attachment suffer from worse  
57  
58  
59  
60

1  
2  
3 health than those permanently attached. Further, despite a development towards favourable  
4  
5 employment circumstances, health discrepancies can endure, suggesting a potentially  
6  
7 ‘scarring’ effect. Last, those poorly attached display the worst health situation, this partly due  
8  
9 to coexisting burdensome life circumstances. We firmly suggest that policymakers should  
10  
11 consider the results of this study and take responsibility for creating employment  
12  
13 opportunities suitable for maintaining a healthy working life, rather than promoting  
14  
15 employment contracts characterised by poor attachment to the labour market.  
16  
17

### 18 19 **ACKNOWLEDGEMENT**

20  
21  
22 Thanks to all the participants in the Northern Swedish Cohort. Liudmila Lipiäinen and Tapio  
23  
24 Nummi are thanked for contributing to this paper with regard to the trajectory analysis.  
25  
26

### 27 28 **COMPETING INTERESTS**

29  
30 None declared.  
31  
32

### 33 34 **FUNDING**

35  
36 This work was supported by Swedish Council for Working Life and Social Research [2006-  
37  
38 0950] the Medical Faculty at Umeå University and the Academy of Finland [grant number  
39  
40 132668 to PV]. The study has been financed by Formas dnr 259-2012-37.  
41  
42  
43  
44

#### 45 46 **Key messages**

- 47 • There is controversy whether being less attached to the labour market is related to  
48 poor health or not.
- 49 • This unclarity might partly stem from the failure to take heterogeneous  
50 employment histories into consideration
- 51 • We have applied trajectory analysis on 12-year labour market history and found  
52 associations between labour market attachment and health status.
- 53 • Those with high level, strengthening and poor level of non-permanent attachment  
54 displayed worse health status than those in permanent employment the entire 12-  
55 year period.
- 56 • Our findings illustrate the temporal complexities of labour market attachment's  
57 impact on health over time

58  
59  
60 For peer review only - <http://bmjopen.bmj.com/site/about/guidelines.xhtml>

**REFERENCES**

- 1 OECD. Labour and Social Affairs. Incidence of temporary employment.: OECD  
2  
3  
4  
5  
6  
7 Online OECD Employment database [cited 12 December 2012, available at  
8  
9  
10  
11  
12  
13  
14  
15  
16  
17  
18  
19  
20  
21  
22  
23  
24  
25  
26  
27  
28  
29  
30  
31  
32  
33  
34  
35  
36  
37  
38  
39  
40  
41  
42  
43  
44  
45  
46  
47  
48  
49  
50  
51  
52  
53  
54  
55  
56  
57  
58  
59  
60
- 1 OECD. Labour and Social Affairs. Incidence of temporary employment.: OECD  
Online OECD Employment database [cited 12 December 2012, available at  
[www.oecd.org/employment/database](http://www.oecd.org/employment/database)  
2012.
- 2 Virtanen P, Lipiäinen L, Hammarström A, *et al.* Tracks of labour market attachment in  
early middle age: A trajectory analysis over 12 years. *Adv Life Course Res* 2011;**16**:55-64.
- 3 Furåker B, Berglund T. Changes of Employer, Employment Protection Legislation and  
Labour Market Attachment. *6:th Conference in Memory of Professor Marco Biagi*. Modena,  
Italy 2008.
- 4 Department for Transport. Data Sources for the Appraisal of Regeneration Impacts:  
TAG Unit 3.5.13 [accessed 18th Nov 2013 available at:  
<http://www.dft.gov.uk/webtag/documents/expert/pdf/unit3.5.13.pdf>]. Government of the  
United Kingdom 2011.
- 5 Dooley D, Fielding J, Levi L. Health and unemployment. *Anu Rev Publ Health*  
1996;**17**:449-65.
- 6 Hammarström A. Youth unemployment and ill health: results from a two-year follow-  
up study [in Swedish, summary in English]. Solna: Karolinska Institutet 1986.
- 7 McKee-Ryan FM, Song ZL, Wanberg CR, *et al.* Psychological and physical well-  
being during unemployment: A meta-analytic study. *J Appl Psychol* 2005;**90**:53-76.
- 8 Brenner H, Ahern W. Sickness absence and early retirement on health grounds in the  
construction industry in Ireland. *Occup Environ Med* 2000;**57**:615-20.

- 1  
2  
3 9 Mauno S, De Cuyper N, Kinnunen U, *et al.* Work characteristics in long-term  
4 temporary workers and temporary-to-permanent workers: A prospective study among Finnish  
5 health care personnel. *Econ Ind Democracy* 2012;**33**:357-77.  
6  
7  
8  
9  
10 10 Waenerlund AK, Virtanen P, Hammarström A. Is temporary employment related to  
11 health status? Analysis of the Northern Swedish Cohort. *Scand J Public Health* 2011;**39**:533-  
12 9.  
13  
14  
15  
16 11 Waenerlund A-K. Temporary employment and illness. *Department of Public Health*  
17 *and Clinical medicine*. Umeå: Umeå University 2013.  
18  
19  
20  
21 12 Aronsson G, Dallner M, Lindh T, *et al.* Flexible pay but fixed expenses: Personal  
22 financial strain among on-call employees. *Int J Health Serv* 2005;**35**:499-28.  
23  
24  
25 13 Parker SK, Griffin MA, Sprigg CA, *et al.* Effect of temporary contracts on perceived  
26 work characteristics and job strain: A longitudinal study. *Pers Psychol* 2002;**55**:689-719.  
27  
28  
29  
30 14 Ferrie JE, Westerlund H, Virtanen M, *et al.* Flexible labor markets and employee  
31 health. *Scand J Work Environ Health* 2008:98-10.  
32  
33  
34 15 Kim MH, Kim CY, Park JK, *et al.* Is precarious employment damaging to self-rated  
35 health? Results of propensity score matching methods, using longitudinal data in South  
36 Korea. *Soc Sci Med* 2008;**67**:1982-94.  
37  
38  
39  
40 16 Virtanen P, Vahtera J, Kivimaki M, *et al.* Employment security and health. *J*  
41 *Epidemiol Community Health* 2002;**56**:569-74.  
42  
43  
44  
45 17 Virtanen P, Liukkonen V, Vahtera J, *et al.* Health inequalities in the workforce: the  
46 labour market core-periphery structure. *Int J Epidemiol* 2003;**32**:1015-21.  
47  
48  
49  
50 18 Bardasi E, Francesconi M. The impact of atypical employment on individual  
51 wellbeing: evidence from a panel of British workers. *Soc Sci Med* 2004;**58**:1671-88.  
52  
53  
54 19 Virtanen P, Vahtera J, Kivimaki M, *et al.* Labor market trajectories and health: a four-  
55 year follow-up study of initially fixed-term employees. *Am J Epidemiol* 2005;**161**:840-46.  
56  
57  
58  
59  
60

- 1  
2  
3 20 Waenerlund AK, Gustafsson PE, Virtanen P, *et al.* Is the core-periphery labour market  
4 structure related to perceived health? findings of the Northern Swedish Cohort. *BMC Public*  
5 *Health* 2011;**11**:10.  
6  
7  
8  
9  
10 21 Broughton A, Biletta I, Kullander M. Flexible forms of work: 'very atypical'  
11 contractual arrangements. European Foundation for the Improvement of Living and Working  
12 Conditions 2010.  
13  
14  
15  
16 22 Liukkonen V, Virtanen P, Vahtera J, *et al.* Employment trajectories and changes in  
17 sense of coherence. *Eur J Public Health* 2010;**20**:293-8.  
18  
19  
20  
21 23 Nagin DS. Analyzing developmental trajectories: A semiparametric, group-based  
22 approach. *Psychol Methods* 1999;**4**:139-57.  
23  
24  
25 24 Hammarström A, Janlert U. Cohort Profile: The Northern Swedish Cohort. *Int J*  
26 *Epidemiol* 2011.  
27  
28  
29  
30 25 Jones SRG, Riddell WC. Unemployment and nonemployment: Heterogeneities in  
31 labor market states. *Rev Econ Stat* 2006;**88**:314-23.  
32  
33  
34 26 Grzywacz JG, Dooley D. "Good jobs" to "bad jobs": replicated evidence of an  
35 employment continuum from two large surveys. *Soc Sci Med* 2003;**56**:1749-60.  
36  
37  
38 27 Furåker B, & Berglund, T. *Changes of Employer, Employment Protection and Labour*  
39 *Market Attachment: An Analysis of Swedish Data from 1972-1998*. Gothenburg: University of  
40 Gothenburg 2008.  
41  
42  
43  
44 28 Laux R. Measuring labour market attachment using the Labour Force Survey. *Labour*  
45 *market trends [1361-4819]* 1997;**105 (10)**:407 (8).  
46  
47  
48  
49 29 Rousseau D, ed. *Psychological contracts in organizations: Understanding written and*  
50 *unwritten agreements*. Thousand Oaks, CA: Sage 1995.  
51  
52  
53  
54 30 Meyer J, Paunonen S., Gellatly I., & Goffin R. . Organizational commitment and job  
55 performance: It's the nature of commitment that counts. *J Appl Psychol* 1989;**74**:152-6.  
56  
57  
58  
59  
60

- 1  
2  
3 31 Greenhalgh L, Rosenblatt Z. Job insecurity: Toward conceptual clarity. *Acad Manage*  
4 *Rev* 1984;**9**:438-48.  
5  
6  
7 32 Aronsson G, Gustafsson K, Dallner M. Forms of employment, work environment and  
8 health in to a centre - periphery perspective. *Arbete och Hälsa (Work and Health)*. Stockholm:  
9 National Institute for Working Life 2000.  
10  
11  
12  
13 33 Statistics Sweden. Undersökning om levnadsförhållande [In English: Survey of living  
14 conditions]. Stockholm: Statistics Sweden 1980.  
15  
16  
17  
18 34 Hammarström A, Virtanen P, Janlert U. Are the health consequences of temporary  
19 employment worse among low educated than among high educated? *Eur J Public Health*  
20 2010.  
21  
22  
23  
24  
25 35 Siegrist J, Marmot M. Health inequalities and the psychosocial environment - two  
26 scientific challenges. *Soc Sci Med* 2004;**58**:1463-73.  
27  
28  
29  
30 36 Black D, Morris JN, Townsend P, *et al*. Inequalities in Health. Report of a research  
31 working group. London: Department of Health and Social Security 1980.  
32  
33  
34 37 Marmot M, Allen J, Goldblatt P, *et al*. Fair society, healthy lives: Strategic review of  
35 health inequalities in England post-2010 (the Marmot review). London: UCL 2010.  
36  
37  
38 38 Lynch J, Kaplan G. Socioeconomic Position. In: Berkman LF, Kawachi I, eds. *Social*  
39 *Epidemiology*. New York: Oxford University Press 2000:13-35.  
40  
41  
42  
43 39 Artazcoz L, Benach J, Borrell C, *et al*. Social inequalities in the impact of flexible  
44 employment on different domains of psychosocial health. *J Epidemiol Community Health*  
45 2005;**59**:761-67.  
46  
47  
48  
49 40 Statistics Sweden. Socioekonomisk indelning (SEI). Meddelande i samordningsfrågor  
50 1982:4 (Swedish Socioeconomic Classification). Stockholm: Statistics Sweden 1983.  
51  
52  
53  
54 41 Golsch K. Employment flexibility in Spain and its impact on transitions to adulthood.  
55 *Work Employ Soc* 2003;**17**:691-718.  
56  
57  
58  
59  
60

- 1  
2  
3 42 Waldron I, Weiss CC, Hughes ME. Interacting effects of multiple roles on women's  
4 health. *J Health Soc Behav* 1998;**39**:216-36.  
5  
6  
7 43 Aronsson G, Gustafsson K, Dallner M. Work environment and health in different  
8 types of temporary jobs. *Eur J Work Organ Psy* 2002;**11**:151-75.  
9  
10  
11 44 Vives A, Amable M, Ferrer M, *et al.* Employment Precariousness and Poor Mental  
12 Health: Evidence from Spain on a New Social Determinant of Health. *Journal of*  
13 *Environmental and Public Health [Epub 2013 Feb 3]* In press.  
14  
15  
16  
17  
18 45 Muthén B, & Muthén, L. . Integrating person-centered and variable-centered analyses:  
19 Growth mixture modeling with latent trajectory classes. *Alcohol Clin Exp Res* 2000;**24**:882-  
20  
21  
22  
23 91.  
24  
25 46 Tolvanen A. Latent growth mixture modelling: A simulation study. *Department of*  
26 *Mathematics and Statistics*. Finland: University of Jyväskylä 2007.  
27  
28  
29 47 Cockx B, Picchio M. Are Short-lived Jobs Stepping Stones to Long-Lasting Jobs? *Oxf*  
30 *Bull Econ Stat* 2012;**74**:646-75.  
31  
32  
33  
34 48 Statistics Sweden. Women and men in Sweden 2012. Örebro: Statistics Sweden 2012.  
35  
36 49 Mirowsky J, Ross C. *Social Causes of Psychological Distress*. New York: Aldine De  
37 Gruyter 2003.  
38  
39  
40 50 Strully KW. Job loss and health in the US labour market. *Demography* 2009;**46**:221-  
41  
42  
43 46.  
44  
45 51 Bartley M. Unemployment and Ill Health - Understanding the Relationship. *J*  
46 *Epidemiol Community Health* 1994;**48**:333-7.  
47  
48  
49 52 Ferrie JE. Is job insecurity harmful to health? *J R Soc Med* 2001;**94**:71-6.  
50  
51  
52 53 Tompa E, Scott-Marshall H, Dolinschi R, *et al.* Precarious employment experiences  
53 and their health consequences: towards a  
54  
55  
56 theoretical framework. *Work* 2007;**28**:209-24.  
57  
58  
59  
60



- 1  
2  
3 54 Facey ME, Eakin JM. Contingent work and ill-health: Conceptualizing the links. *Soc*  
4  
5 *Theory Health*;8:326-49.  
6  
7 55 Jung T, Wickrama KAS. An Introduction to Latent Class Growth Analysis and  
8  
9 Growth Mixture Modeling. *Social and Personality Psychology Compass* 2008;2:302-17.  
10  
11 56 Hynes K, Clarkberg M. Women's employment patterns during early parenthood: A  
12  
13 group-based trajectory analysis. *J Marriage Fam* 2005;67:222-39.  
14  
15 57 Guest DE, Isaksson K, De Witte H, eds. *Employment contracts, psychological*  
16  
17 *contracts, and worker well-being: an international study*. Oxford: Oxford University Press  
18  
19 2010.  
20  
21 58 Kim IH, Muntaner C, Shahidi FV, *et al*. Welfare states, flexible employment, and  
22  
23 health: A critical review. *Health Policy* 2012;104:99-127.  
24  
25 59 TCO. Additional comment from TCO regarding infringement procedure 2007/4835  
26  
27 against Sweden. Stockholm The Swedish Confederation for professional employees  
28  
29 [http://www.tco.se/Documents/Additionalcomments.pdf] 2013.  
30  
31 60 Weitoft GR, Rosén M. Is perceived nervousness and anxiety a predictor of premature  
32  
33 mortality and severe morbidity? A longitudinal follow up of the Swedish survey of living  
34  
35 conditions. *J Epidemiol Community Health* 2005;59:794-8.  
36  
37 61 Idler EL, Benyamini Y. Self-rated health and mortality: a review of twenty-seven  
38  
39 community studies. *J Health Soc Behav* 1997;38:21-37.  
40  
41 62 Wärneryd B, Thorslund M, Östlin P. The quality of retrospective questions about  
42  
43 occupational history--a comparison between survey and census data. *Scand J Soc Med*  
44  
45 1991;19:7-13.  
46  
47  
48  
49  
50  
51  
52  
53  
54  
55  
56  
57  
58  
59  
60

1  
2  
3  
4  
5  
6  
7  
8  
9  
10  
11  
12  
13  
14  
15  
16  
17  
18  
19  
20  
21  
22  
23  
24  
25  
26  
27  
28  
29  
30  
31  
32  
33  
34  
35  
36  
37  
38  
39  
40  
41  
42  
43  
44  
45  
46  
47  
48  
49  
50  
51  
52  
53  
54  
55  
56  
57  
58  
59  
60

Figure 1. The number of cohort members clustered by trajectory analysis into eight tracks (curves based on means of the attachment at the time points).

Figure 2. Collapsed tracks of labour market attachment history. Permanent, high level, strengthening and poor attachment.

For peer review only

1  
2  
3  
4  
5  
6  
7  
8  
9  
10  
11  
12  
13  
14  
15  
16  
17  
18  
19  
20  
21  
22  
23  
24  
25  
26  
27  
28  
29  
30  
31  
32  
33  
34  
35  
36  
37  
38  
39  
40  
41  
42  
43  
44  
45  
46  
47  
48  
49  
50  
51  
52  
53  
54  
55  
56  
57  
58  
59  
60

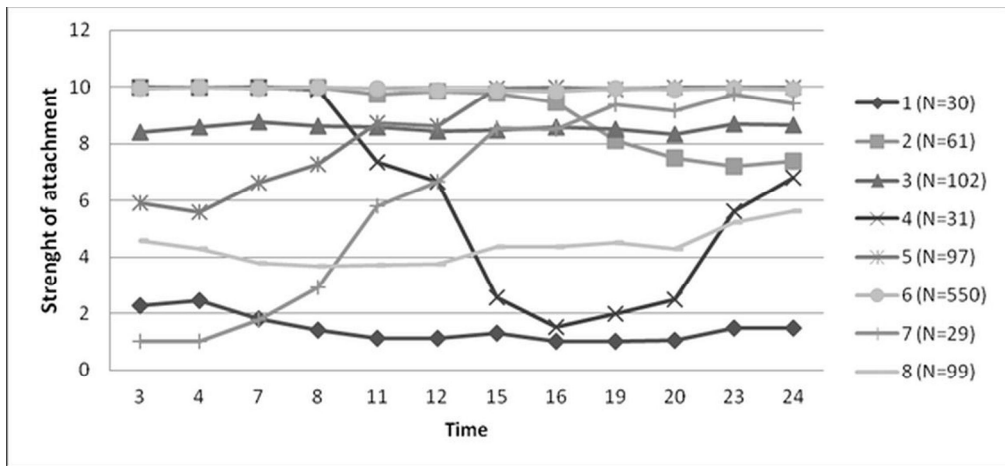

194x90mm (300 x 300 DPI)

Peer review only

1  
2  
3  
4  
5  
6  
7  
8  
9  
10  
11  
12  
13  
14  
15  
16  
17  
18  
19  
20  
21  
22  
23  
24  
25  
26  
27  
28  
29  
30  
31  
32  
33  
34  
35  
36  
37  
38  
39  
40  
41  
42  
43  
44  
45  
46  
47  
48  
49  
50  
51  
52  
53  
54  
55  
56  
57  
58  
59  
60

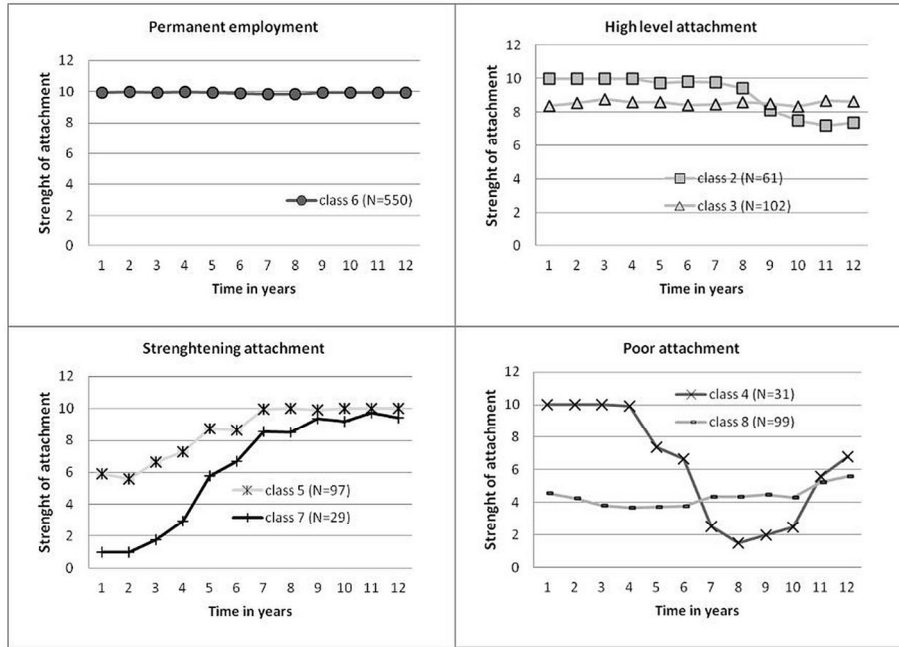

117x90mm (300 x 300 DPI)

Review only



**History of labour market attachment as a determinant of health status: a 12-year follow-up of the Northern Swedish Cohort**

|                                 |                                                                                                                                                                                                                                                                                                                                                  |
|---------------------------------|--------------------------------------------------------------------------------------------------------------------------------------------------------------------------------------------------------------------------------------------------------------------------------------------------------------------------------------------------|
| Journal:                        | <i>BMJ Open</i>                                                                                                                                                                                                                                                                                                                                  |
| Manuscript ID:                  | bmjopen-2013-004053.R2                                                                                                                                                                                                                                                                                                                           |
| Article Type:                   | Research                                                                                                                                                                                                                                                                                                                                         |
| Date Submitted by the Author:   | 14-Jan-2014                                                                                                                                                                                                                                                                                                                                      |
| Complete List of Authors:       | Waenerlund, Anna-Karin; Umeå University, Public Health and Clinical Medicine<br>Gustafsson, Per; Umeå University, Public Health and Clinical Medicine<br>Hammarström, Anne; Umeå University, Public Health and Clinical Medicine<br>Virtanen, Pekka; University of Tampere, School of Health Sciences and Institute for Advanced Social Research |
| <b>Primary Subject Heading</b>: | Occupational and environmental medicine                                                                                                                                                                                                                                                                                                          |
| Secondary Subject Heading:      | Epidemiology, Occupational and environmental medicine, Public health                                                                                                                                                                                                                                                                             |
| Keywords:                       | EPIDEMIOLOGY, OCCUPATIONAL & INDUSTRIAL MEDICINE, PUBLIC HEALTH                                                                                                                                                                                                                                                                                  |
|                                 |                                                                                                                                                                                                                                                                                                                                                  |

SCHOLARONE™  
Manuscripts

1  
2  
3  
4  
5 **History of labour market attachment as a determinant of health status: a**  
6 **12-year follow-up of the Northern Swedish Cohort**  
7  
8  
9

10  
11  
12 ANNA-KARIN WAENERLUND<sup>1</sup>, PER E GUSTAFSSON<sup>1</sup>, ANNE HAMMARSTRÖM<sup>1</sup>,  
13  
14 PEKKA VIRTANEN<sup>2,3</sup>  
15  
16  
17  
18  
19

20  
21 <sup>1</sup>Department of Public Health and Clinical Medicine, Family Medicine, Umeå University,  
22  
23 Umeå, Sweden.  
24

25  
26 <sup>2</sup>School of Health Sciences and Institute for Advanced Social Research, University of  
27  
28 Tampere, Finland.  
29

30  
31 <sup>3</sup> Department of Public Health and Clinical Medicine, Epidemiology and Global Health,  
32  
33 Umeå University, Umeå, Sweden.  
34  
35  
36  
37  
38

39  
40 Correspondence: Anna-Karin Waenerlund, Department of Public Health and Clinical  
41  
42 Medicine, Umeå University, SE-901 85, Umeå, Sweden. Telephone: +46 90 785 35 81. Fax  
43  
44 number: +46 90 77 68 83  
45

46  
47 E-mail address: [annakarin.waenerlund@umu.se](mailto:annakarin.waenerlund@umu.se)  
48

49  
50 Word count: 5087  
51

52  
53 Keywords: public health, psychological distress, employment, cohort, health, trajectory  
54  
55 analysis.  
56  
57  
58  
59  
60

## ABSTRACT

**Objective:** The present study aims at using trajectory analysis to measure labour market attachment (LMA) over 12 years and at examining whether labour market tracks relate to perceived health status.

**Design:** Data were retrieved from a 26-year prospective cohort study, the Northern Swedish Cohort.

**Setting and participants:** All 9th grade students (n=1083) within the municipality of Luleå in northern Sweden were included in the baseline investigation in 1981. The vast majority (94%) of the original cohort participated at the fourth follow-up. In this study, 969 participants were included.

**Measures:** Perceived health status (psychological distress and non-optimal self-rated health) at age 42 and the data obtained from questionnaires.

**Results:** We have identified four tracks in relation to LMA across the 12-year period: 'permanent', 'high level', 'strengthening' and 'poor level' of attachment. LMA history relates to psychological distress. High level (OR 1.55 (1.06-2.27)), strengthening (OR 1.95 (1.29-2.93)) and poor attachment (OR 3.14 (2.10-4.70)) involve higher OR for psychological distress compared to permanent attachment. The overall p-value remained significant in the final model (0.001). Analyses regarding non-optimal self-rated health displayed a similar pattern but this was not significant in the final model.

**Conclusions:** Our results suggest that health status in mid-life, particularly psychological distress, is related to patterns of LMA history, to a large part independently of other social risk factors and previous health. Consideration of heterogeneity and time in labour market attachment might be important when analysing associations with perceived health.

1  
2  
3  
4  
5  
6 Main strengths  
7  
8

- 9
- 10 • Using longitudinal data with exceptionally high response-rate
  - 11 • Applying trajectory analysis which only has previously been sparsely used in this field
  - 12 • Provides a uniquely rich and detailed data on temporary contracts over a long period
  - 13 of time
  - 14
  - 15
  - 16
  - 17
  - 18

19 Limitations

- 20
- 21 • Relies on self-reported data
  - 22 • Used a relatively small sample
  - 23
  - 24
  - 25
  - 26

27 Key messages

- 28
- 29 • There is controversy as to whether being less attached to the labour market is
  - 30 related to poor health or not.
  - 31 • This unclarity might partly stem from the failure to take heterogeneous
  - 32 employment histories into consideration
  - 33 • We have applied trajectory analysis to 12-year labour market history and found
  - 34 associations between labour market attachment and health status.
  - 35 • Those with high level, strengthening and poor level of non-permanent attachment
  - 36 displayed worse health status than those in permanent employment in the entire
  - 37 12-year period.
  - 38 • Our findings illustrate the temporal complexities of labour market attachment's
  - 39 impact on health over time
  - 40
  - 41
  - 42
  - 43
  - 44
  - 45
  - 46
  - 47
  - 48
  - 49
  - 50
  - 51
  - 52
  - 53
  - 54
  - 55
  - 56
  - 57
  - 58
  - 59
  - 60



## INTRODUCTION

During the last three decades or so, demands for a more flexible workforce have increased all over the world. Flexibility in the labour market is reflected, for example, in the proportion of temporary employees, which in recent years has varied between 13 and 15% of the total working population in Europe.[1] To the individual, the consequence of flexible employment is that attachment to a workplace is weak and commonly interrupted by unemployment and other episodes out of work. In order to capture the total spectrum of employment relations, with regard to both quality and quantity, we have chosen to work with the concept of 'labour market attachment' (LMA) in this study. In our definition of the LMA spectrum we have included permanent, non-permanent employment, unemployment and those who are exempted from working. [2-4]

Some relations between labour market status and health status are widely accepted: permanent employment is considered beneficial to health, while unemployment is known to have adverse health effects[5-7] and being out of the labour market in the long term is commonly due to poor health.[8] But when it comes to the health implications of labour market status, between the extremes of the LMA spectrum, the evidence is much scarcer. Previous studies have proposed that temporary employment could be a risk of poor psychosocial work characteristics [9] with temporary employees more commonly experiencing job insecurity and having a low cash margin [10], which are some of the factors that can be potential pathways linking weak LMA to poor health. We have for example shown that long-term temporary employees often experience difficulties working full-time (underemployment) which influences their financial situation in a negative way [11] and can thus be a source of

1  
2  
3 worry.[12] Poor health can also be mediated through job strain, although it seems as if this  
4  
5 group is affected more by limited influence or control rather than high demands.[13]  
6  
7 Moderate LMA has been highlighted as potentially harmful for health status, but research on  
8  
9 the topic is divergent.[14] Whereas some studies report worse self-rated health among  
10  
11 temporary employees,[15] a few studies even suggest better self-rated health among fixed-  
12  
13 term employees.[16] Some studies also indicate that deterioration in self-rated health may not  
14  
15 be observable until the attachment is quite weak.[17] A major answer to the mixed research  
16  
17 results may lie in the inherent difficulty in capturing the changeable nature of employment.  
18  
19 Measurement of the employment situation at one or a few points in time, as in most of the  
20  
21 previous studies,[18, 19] may overlook the factual exposures to different positions. Health  
22  
23 effects of temporary employment could surface after several years of accumulation, as we  
24  
25 have shown in a previous report,[20] or even when several years have passed after the  
26  
27 exposure.[21] Moreover, it is possible that it is the chain of passages in different  
28  
29 employments, the trajectory of LMA, that contributes to health status. E.g. becoming more  
30  
31 strongly attached over time could contribute to health status differently than becoming less  
32  
33 attached to the labour market even if the both groups holds same total exposure.  
34  
35  
36  
37  
38  
39  
40  
41

42 There are a lot of studies about particular labour market statuses as predictors of health. An  
43  
44 inherent problem of such studies is the amount of exposure: cross-sectional information about  
45  
46 status includes great variation, a variable based on the duration of the ongoing status is bound  
47  
48 to use cross-sectional health data, and in prospective follow-up settings there may be periods  
49  
50 in several statuses during the follow-up. The problem is of special importance in research on  
51  
52 the health effects of atypical employment, as there are a wide range of statuses between  
53  
54 permanent employment and overt unemployment. To address this topic, we have introduced a  
55  
56 score that sums up the exposure to different types of non-permanent employment during the  
57  
58  
59  
60

1  
2  
3 follow-up [20]. The score, however, does not take into account the timing of the exposures.  
4  
5 One way to capture the status chains, or the passages in and the transitions between different  
6  
7 labour market positions, is provided by trajectory analysis. Applying this method with a four-  
8  
9 class response variable (permanent employment, non-permanent employment, unemployment  
10  
11 and out of the labour force) the members of the Northern Swedish Cohort have been clustered  
12  
13 into six different ‘labour market attachment tracks’[2]. For the trajectory analysis of the  
14  
15 present study, labour market attachment was measured by a ten-class indicator, in order to  
16  
17 articulate in more detail the trajectories of non-permanent employment and their association  
18  
19 with health.  
20  
21  
22  
23  
24  
25  
26

27 The few available studies about labour market trajectories in the field of public health have  
28  
29 measured LMA at a few time points, e.g. between one time point and another[9] and the goal  
30  
31 has been descriptive rather than analytic.[19, 22] In the present study, we have applied a  
32  
33 refined scale with regard to LMA. In the measure we have included a spectrum of types of  
34  
35 employment situations and also covered a time-span of 12 years. The method, trajectory  
36  
37 analysis[23], offers a novel way to identify differential tracks of LMA history in our  
38  
39 population cohort. After obtaining a relevant set of tracks, our aim is to examine in which  
40  
41 ways they relate to non-optimal self-rated health or perceived psychological distress.  
42  
43  
44  
45

## 46 **METHOD**

### 47 **Population and procedures**

48  
49  
50 The study was initiated in 1981 and included all pupils in their last year of compulsory school  
51  
52 (n=1083), in the medium-sized industrial town of Luleå in northern Sweden (95% of the  
53  
54 cohort were born in 1965). Since 1981 four additional follow-ups have been conducted.[24]  
55  
56  
57  
58  
59  
60

1  
2  
3 The attrition rate in the most recent follow-up from 2007 was low; 94% (n=1005) of the  
4 original cohort who were still alive (n=1071) participated. Comprehensive questionnaires,  
5 completed by the participants in 1981, 1983, 1986, 1995 and 2007, were used as the main  
6 assessment method. This paper is based on data from the 1995 and 2007 follow-ups.  
7  
8

9  
10  
11 Procedures of data collection are described more extensively elsewhere.[24] The study was  
12 approved by the Regional Ethical Review Board in Umeå, Sweden.  
13  
14

## 15 16 17 **Measurements**

### 18 19 20 LMA history

21  
22  
23 We name the response variable of the trajectory analysis ‘labour market attachment’ (LMA).  
24 It aims to serve as a conceptual and empirical tool to sort the employment statuses of the post-  
25 industrial labour market along a continuum.[25, 26] Crudely, it ‘refers to whether or not  
26 people have continuous employment (for example all year or only part of it) and whether or  
27 not they have periods of unemployment’ [27] At headline level [28] there are four major  
28 classes of LMA: non-employment, unemployment, temporary employment and permanent  
29 employment. Within each class, several subclasses can be discerned. In the present study, the  
30 interest is focused on differential temporary employment. Seen through LMA, temporary  
31 employment covers a set of positions defined by formal job contracts, regardless of the  
32 psychological contract, [29] job commitment [30] or perceived job insecurity.[31]  
33  
34  
35  
36  
37  
38  
39  
40  
41  
42  
43  
44

45  
46 Participants’ labour market position from 1996 to 2007 was measured with a matrix  
47 consisting of columns representing half-year periods and rows representing different labour  
48 market positions. With the instruction ‘During which periods have you been employed  
49 permanently or have had some type of temporary job contract or have been out of work?’ the  
50 respondents were prompted to choose between 11 response options for each six-month period:  
51 ‘permanently employed’ (coded as 10), ‘entrepreneur’ (9), ‘employed in project’ (8),  
52  
53  
54  
55  
56  
57  
58  
59  
60

1  
2  
3 ‘substitute’ (7), ‘probationary employment’ (6), ‘on-demand worker’ (5), ‘seasonal worker’  
4  
5 (4), ‘temporary employee for other reasons’ (3), ‘in employment policy measure’ (2),  
6  
7 ‘unemployed’ (2), ‘out of the labour market’ (1). Unemployment and participation in policy  
8  
9 measure were merged, and each option was coded to a variable that expressed the strength of  
10  
11 LMA on a scale from 10 to 1. The ranking of contracts has been tested in previous research on  
12  
13 the accumulation of temporary employment[20] and was based on Aronsson’s core-periphery  
14  
15 model,[32] which proposes that there is a health gradient in relation to the type of  
16  
17 employment contract. The model ranks contracts based on duration, possibility of on-the-job  
18  
19 training, autonomy, and job security.[32] However, we have extended the ranking by also  
20  
21 including three labour market positions of non-employment. In the event of ‘out of labour  
22  
23 market’, a continuum of five or more periods (i.e. 2.5 years) was required: if there were fewer  
24  
25 than five, all periods were coded according to the last labour market position, to purposely  
26  
27 exclude those on parental leave or studying from this category. As the last category ‘out of  
28  
29 labour market’ was given the lowest score in relation to LMA. The intention for this group  
30  
31 was that it was supposed to be contained by those mainly on sickness benefit (supported by  
32  
33 analysis, data not shown), not those temporarily not working due to parental leave or  
34  
35 education). These operations thus yielded a score of the strength of LMA for each of the 24  
36  
37 successive half-year periods. The scores served as the data for the trajectory analysis.  
38  
39  
40  
41  
42

#### 43 Indicators of health status

44  
45  
46 *Psychological distress at age 30 and 42* was measured with a question that inquired whether  
47  
48 the respondent during the last year had experienced any of the following symptoms:  
49  
50 restlessness, concentration problems, being worried or anxious, palpitations, anxiety or panic  
51  
52 or other nervous problems. Reporting one or more of the six symptoms was coded as 1 and  
53  
54 none as 0, equalling a dichotomisation into the quartile with the most symptoms versus the  
55  
56 rest. The question was derived from the ‘Survey of living conditions’.[33]  
57  
58  
59  
60

1  
2  
3  
4  
5  
6 *Non-optimal self-rated health at age 30 and 42*, was measured with one question, ‘How do  
7 you rate your general health?’, with response options: good, average or bad.[33] The  
8 responses were dichotomised into the quartile with the worst health (average or bad) coded as  
9 1, and the rest (good) coded as 0.[10, 34]

#### 15 Covariates

16  
17  
18 Socio-economic position is a strong predictor of health [35-38]. LMA has been shown to be  
19 related to occupational class.[39] It is important to consider socio-economic position as a  
20 possible confounder when studying the relationship between temporary employment and  
21 illness. In this study *Socioeconomic position (SEP) in 2007* was based on one question about  
22 occupation, which was classified according to the Swedish socioeconomic classification of  
23 occupational categories.[40] Upper white-collar and self-employed were coded as 0, lower  
24 white-collar workers were coded as 1 and blue-collar workers were coded as 2.

25  
26  
27 Partnership and parenthood are also important factors in relation to LMA as these two may be  
28 postponed due to insecure working arrangement [39, 41], which could influence social aspects  
29 related to illness [39]. Marriage or having a partner is also important to consider when  
30 studying LMA, as it can be beneficial to health and financial resources [42]. *Parental status in*  
31 *2007*, was coded as 0 for those having children and as 1 for the childless. *Marital status in*  
32 *2007* was measured with one question: ‘Are you married or co-habiting?’ Yes was coded as 0  
33 and no as 1.

34  
35  
36  
37  
38  
39  
40  
41  
42  
43  
44  
45  
46  
47  
48  
49  
50  
51 More women than men have poor LMA in terms of temporary employment. [43] Gender has  
52 been considered as an important factor in relation to poor LMA and illness, where women’s  
53 health might be at greater risk. [44] *Women* were coded as 0 and *Men* as one.

## Statistics

The participants were clustered according to the development of their LMA over the 12 years applying trajectory analysis.[23] The method has been established as a way of studying individual developmental courses over age or time, and for identifying distinctive groups of individual trajectories within the population that emerge, instead of predefined criteria, from the data itself. Trajectory analysis consists of three steps. First, the appropriate probabilistic model is chosen for the response variable. The second step is to define the degree of the polynomial form of the trajectories. Finally, the number of the clusters is decided, employing the statistical information criteria and the 'common sense criteria' with respect to the substance and aims of the study. As a result, the developmental trajectories within clusters are as similar as possible, and trajectories between clusters are as different as possible.[45] At individual level, cluster membership is dictated by the highest calculated posterior probability of belonging to a particular cluster.

Trajectory analyses were conducted with the Mplus program package. The analysis allowed for 12 time points, and the first and the second half of every second year were chosen in order to take into account possible systematic seasonal variation of LMA.

We used logistic regression (odds ratio and 95% CI) to test whether LMA history was associated with non-optimal self-rated health and psychological distress at age 42.

Adjustments were made for the health indicator at age 30, gender, socioeconomic position, parental status and marital status. SPSS v17 was used for the regression analyses. Women and men were analysed together to preserve power.

## RESULTS

The data consists of a ten-class ordinal indicator of LMA, and the form of probability distribution of longitudinal sequence of measurement for such variable is the multinomial distribution.

The adjusted Bayesian information criterion (BIC) value decreased from 17435.474 for the linear model to 16656.622 for the quadratic polynomial model, indicating that the latter can be preferred to the former. Other information criteria provided by the Mplus program likewise pointed in the same direction.

The optimal number of trajectories was searched by checking the solutions up to nine. The adjusted Bayesian information criterion (Adj. BIC) was used for choosing the solution.[46] The Adj. BIC value (as well as the other information criteria) decreased when the number of trajectories was increased, rapidly at the beginning and slower at the end. From seven-trajectory to eight-trajectory solution the figure decreased from 17856.940 to 17606.402. Thereafter the decrease slowed down. We decided to continue with eight trajectories, as this solution provided, in addition to detailed depiction of differential LMA, the opportunity to exclude the cluster with zero LMA that was outside our research interest.

(Figure 1 here)

Figure 1 illustrates the 'labour market tracks' based on means of the LMA scores at each time point of the individuals classified into each trajectory. Individuals on track 1 (3% of the cohort) also were excluded, as they were mainly disability pension recipients and their health was poor by definition. The track (6) of 'permanent' employment throughout the follow-up included more than half of the cohort, whereas the remaining six clusters were relatively small and there were relatively similar tracks. We collapsed these six clusters into three as follows. A considerable part (class 2 and 3) maintained a continuously 'high level' of attachment, and



about 12% (class 5 and 7) displayed a ‘strengthening’ of attachment towards the end of the follow-up. The attachment was permanently weak in about 1 of 10 (class 8), and a small cluster with a U-shaped pattern (class 4) was also seen; we decided to collapse these clusters and defined their attachment as ‘poor’. In addition to being substantially grounded, this collapsing provided statistical power for subsequent analyses. Thus, we arrived at a four class ‘LMA history’ variable that comprised ‘permanent’(class 6), ‘high level’(class 2 and 3), ‘strengthening’(class 5 and 7) and ‘poor’ (class 4 and 8) LMA (Figure 2).

(Figure 2 here)

Table 1. Distribution (%) of dependent and independent variables in relation to LMA history. All values are displayed in %, except p-values.

|                               | n=550     | n=163      | n=126         | n=130 | P-value          |
|-------------------------------|-----------|------------|---------------|-------|------------------|
|                               | Permanent | High level | Strengthening | Poor  | ( $\chi^2$ test) |
| Track                         | 0         | 1          | 2             | 3     |                  |
| Dependent variables age 42    |           |            |               |       |                  |
| Psychological distress        | 26.3      | 35.7       | 41.0          | 52.8  | <0.001           |
| Non-optimal self-rated health | 29.1      | 36.2       | 39.2          | 48.1  | <0.001           |
| Independent variables         |           |            |               |       |                  |
| Health status at age 30       |           |            |               |       |                  |
| Psychological distress        | 19.4      | 27.3       | 36.3          | 31.9  | <0.001           |
| Non-optimal self-rated health | 16.8      | 29.4       | 26.6          | 33.3  | <0.001           |
| Sociodemographics             |           |            |               |       |                  |
|                               |           |            |               |       | <0.001           |
| Blue-collar worker            | 33.5      | 25.8       | 35.7          | 47.7  |                  |
| Lower white-collar worker     | 15.7      | 8.0        | 18.3          | 6.2   |                  |
| Upper white-collar worker     | 50.8      | 66.3       | 46.0          | 46.2  |                  |
| Single marital status         | 19.1      | 20.9       | 22.2          | 32.6  | 0.010            |
| No child as parental status   | 17.3      | 16.6       | 15.1          | 19.4  | 0.831            |
| Women                         | 44.5      | 42.3       | 61.9          | 55.4  | 0.001            |

Table 1 shows the distribution of the key variables by LMA history. In general, LMA history with less strong attachment entailed poorer health at age 42. Concerning covariates, similar

patterns were seen for psychological distress and non-optimal self-rated health at age 30, thus indicating that health status differed between LMA history already at baseline. There were also significant differences with regard to socioeconomic position; the proportion of blue-collar workers was highest in the group with poor attachment to the labour market. The poor attachment group was also most likely to be living without a partner ( $p=.010$ ). Parental status did not differ between the groups. The proportion of women was higher in strengthening and poor level attachment, whereas the permanent and high level attachment were dominated by men ( $p=.001$ ).

Table 2. Odds ratios (OR) and 95% confidence intervals (CI) for psychological distress and non-optimal self-rated health at age 42 as dependent variable for LMA history over 12 years as main exposure after adjustment for health status age 30, sociodemographic variables.

| Psychological distress as outcome        |       |                  |                  |                  |                  |
|------------------------------------------|-------|------------------|------------------|------------------|------------------|
| Trajectories                             |       | Model 0          | Model 1          | Model 2          | Model 3          |
| Permanent                                | n=550 | 1                | 1                | 1                | 1                |
| High level                               | n=163 | 1.55 (1.06–2.27) | 1.56 (1.06–2.30) | 1.50 (0.99–2.28) | 1.54 (1.01–2.35) |
| Strengthening                            | n=126 | 1.95 (1.29–2.93) | 1.77 (1.17–2.69) | 1.68 (1.07–2.66) | 1.57 (0.99–2.49) |
| Poor                                     | n=130 | 3.14 (2.10–4.70) | 2.77 (1.83–4.19) | 2.87 (1.83–4.49) | 2.52 (1.59–3.98) |
| P-value for LMA                          |       | <0.001           | <0.001           | <0.001           | 0.001            |
| Non-optimal self-rated health as outcome |       |                  |                  |                  |                  |
| Trajectories                             |       | Model 0          | Model 1          | Model 2          | Model 3          |
| Permanent                                | n=550 | 1                | 1                | 1                | 1                |
| High level                               | n=163 | 1.38 (0.96–2.00) | 1.46 (1.00–2.13) | 1.19 (0.81–1.76) | 1.26 (0.85–1.87) |
| Strengthening                            | n=126 | 1.57 (1.05–2.36) | 1.52 (1.00–2.29) | 1.44 (0.94–2.20) | 1.40 (0.91–2.16) |
| Poor                                     | n=130 | 2.26 (1.53–3.34) | 2.00 (1.34–3.00) | 1.83 (1.21–2.77) | 1.65 (1.08–2.53) |
| P-value for LMA                          |       | <0.001           | 0.003            | 0.025            | 0.087            |

Model 0 crude odds ratios

Model 1 odds ratios adjusted for sociodemographic variables (socioeconomic position, gender, marital status and parental status).

Model 2 odds ratios adjusted for health status at age 30

Model 3 odds ratios adjusted for models 1+2.

1  
2  
3 To analyse whether LMA history was related to poor health, self-rated health and  
4  
5 psychological distress were regressed on LMA history with permanent attachment as the  
6  
7 reference category, in multiple logistic regression models (Table 2). The LMA history had a  
8  
9 significant overall p-value on both health outcomes. In unadjusted analyses with  
10  
11 psychological distress, lower strength of attachment involved higher odds than permanent  
12  
13 (Table 2, Model 0; LMA history  $p < 0.001$ ). In model 0 we found increased OR in relation to  
14  
15 lower attachment to the labour market, ranging from high level OR 1.55 (CI 1.06–2.27),  
16  
17 strengthening OR 1.95 (CI 1.29–2.93) , and poor OR 3.14 (CI 2.10–4.70). Adjusting for  
18  
19 covariates (sociodemographic and psychological distress at age 30, Models 1 and 2,  
20  
21 respectively) resulted in attenuation of the ORs for those with ‘strengthening’ and ‘poor’  
22  
23 attachment. Lastly, in the fully adjusted models (Model 3) only the high level and poor  
24  
25 attachment were significantly related to psychological distress, with the ‘poorly’ attached  
26  
27 displaying the numerically strongest association (OR=2.52 CI 1.59–3.98). Although  
28  
29 borderline significant, the OR for the ‘strengthening’ (OR=1.57 CI 0.99–2.49) attachment was  
30  
31 of comparable strength to the ‘high level’ attachment (OR=1.54 CI 1.01–2.35). While with a  
32  
33 slight decrease in OR along with adjustments for sociodemographic factors and previous  
34  
35 health, the same pattern is still evident in the final model, and the overall p value remained  
36  
37 highly significant ( $p = .001$ ).

38  
39  
40  
41  
42  
43  
44  
45  
46 Results for non-optimal self-rated health were slightly less prominent than for psychological  
47  
48 distress but pointed in the same direction. Unadjusted models (Table 2, Model 0) showed a  
49  
50 significant overall relationship between LMA history and self-rated health ( $p < .001$ ), and the  
51  
52 LMA history with ‘strengthening’(OR= 1.57 CI 1.05–2.36) and ‘poor’(OR=2.26 CI 1.53–  
53  
54 3.34) attachment had higher odds of having non-optimal self-rated health. For those with  
55  
56 ‘high level’ (OR=1.38 CI 0.96–2.00) of attachment the risk was numerically higher, although  
57  
58  
59  
60

1  
2  
3 not significantly, than for those with 'permanent' attachment. After adjustment for health  
4  
5 status at age 30 (Model 2) the results for the 'strengthening' group were attenuated below  
6  
7 significance. In the final model, only the OR for the 'poor' attachment group was significantly  
8  
9 high, while the overall p-value for the association of LMA history with non-optimal health  
10  
11 dropped to borderline significance (p=.087).  
12  
13

## 14 15 16 17 18 **DISCUSSION** 19

20  
21 In this study we have identified four tracks of LMA history over 12 years: permanent, high  
22  
23 level, strengthening and poor. Compared to the cohort with 'permanent' attachment, we found  
24  
25 a higher probability of psychological distress among three cohorts with non-permanent LMA.  
26  
27 The differences were partially attributed to previous health and to some extent also to  
28  
29 sociodemographic variables; nevertheless, the overall contribution of LMA history remained  
30  
31 significant in the fully adjusted model. The results for non-optimal self-rated health were  
32  
33 similar but somewhat weaker.  
34  
35  
36  
37  
38  
39

40  
41 Much of the previous research has suggested that temporary employment is a stepping stone  
42  
43 towards more stable employment.[47] In the present study we found that, although the greater  
44  
45 part of the sample already had a fairly strong attachment or were moving towards stronger  
46  
47 attachment, one track remained poorly attached to the labour market over the 12 years. Thus,  
48  
49 while the stepping stone hypothesis might be correct for the majority, a substantial minority  
50  
51 appear to be trapped in an employment situation of permanent temporariness. Further, we  
52  
53 found more women than men in this least favourable situation. This is probably explained by  
54  
55 the widespread use of 'on-demand employment contracts' in women-dominated sectors of  
56  
57 business[43] such as care and welfare and education [48] which are two industries which  
58  
59  
60

1  
2  
3 together stand for 33% of all temporary contracts in Sweden[11]. These results can be  
4  
5 interpreted as showing that, even though Sweden is considered one of the top-ranked gender-  
6  
7 equal countries with regard to high labour market participation among women, the internal  
8  
9 labour market is still gender-segregated.  
10

11  
12  
13  
14  
15 Our findings importantly suggest that in addition to the present LMA, the LMA history is  
16  
17 important for health. In line with previous research we found that the group with least  
18  
19 attachment had the worst health status.[15, 17] As in our previous report showing a  
20  
21 cumulative effect of temporary employment on health status,[20] the present report further  
22  
23 corroborates that employment history impacts on health status. However, a more nuanced  
24  
25 picture emerged when the separate labour market tracks were considered.  
26  
27

28  
29  
30 First, even those with ‘high level’ attachment experienced psychological distress more  
31  
32 commonly than those with ‘permanent’ attachment. Thus, it appears that even marginal  
33  
34 exposure to what could be labelled ‘LMA stress’, can contribute to psychological distress  
35  
36 over time  
37

38  
39  
40 Second, the group with ‘strengthening’ attachment, still experienced poor health more  
41  
42 commonly than those with permanent attachment, even after adjustments for  
43  
44 sociodemographic variables. This result suggests that earlier suboptimal attachment has a  
45  
46 potentially ‘scarring’ effect. It is important to point out that in cross-sectional or short-term  
47  
48 longitudinal designs, the ‘strengthening’ group would have been regarded as having a fairly  
49  
50 favourable labour market attachment. This particular finding therefore stresses the importance  
51  
52 of taking the specific patterns of the long-term labour market history into account when  
53  
54 examining associations with health status.  
55  
56  
57  
58  
59  
60

1  
2  
3 Third, among those poorly attached to the labour market is where we found the highest ORs  
4 for poor health. The poorly attached were also more likely to have other risk factors for  
5 psychological distress, which seemed to partly account for the association. For example, being  
6 single involves a lower average household income and decreases the level of control [49], and  
7 poor previous health could also contribute to difficulties getting a stable attachment to the  
8 labour market, as those with health troubles could be less employable, particularly for blue-  
9 collar occupations[50]. The poorly attached are also those with most experience of  
10 unemployment, which previously has been connected to mortality and morbidity[5, 51]. Thus,  
11 the poor mental health in this group seems to be a result not only of their enduringly  
12 unfavourable LMA history, but also of a range of coexisting burdensome life circumstances.  
13 As described in the introduction job insecurity, financial stress, lack of reciprocity,  
14 uncertainty and lack of autonomy are some of the broad range of potential pathways linking  
15 temporary employment to poor health in previous studies [9, 10, 15, 52-54]. Although  
16 mediating mechanisms has not been within the scope of this paper, our results can be  
17 understood in the light of potential pathways presented in previous research.  
18  
19  
20  
21  
22  
23  
24  
25  
26  
27  
28  
29  
30  
31  
32  
33  
34  
35  
36

### 37 **Methodological considerations**

38  
39  
40 Our study relies on trajectory analysis, a method that became available in the beginning of the  
41 2000s, largely by virtue of increased computing power. Instead of prefixing alternative  
42 developments, the analysis is seeking developmental trajectories that emerge from the data  
43 itself [17]. It gives each individual posterior probability values for each trajectory, and  
44 allocates them according to the highest probability into groups or categories so that  
45 individuals within a group are more similar than individuals between groups [55]. To our  
46 knowledge, trajectory analysis has been used only sparsely in previous studies about  
47 LMA.[56] Our previous research using a core-periphery structure has only yielded a measure  
48 summarising the total accumulation of peripheral employment over 12 years,[20] whereas this  
49  
50  
51  
52  
53  
54  
55  
56  
57  
58  
59  
60

1  
2  
3 study has added new knowledge to the field by showing when exposure takes place and has  
4 provided patterns of labour market history, and this specific knowledge has hinted about  
5 potential scarring effects of poor LMA (seen in the strengthening group), knowledge that has  
6 previously been hidden due to methodological limitations. In general, this study represents  
7 novel methodological ideas in a research area that has been obscured by the practice of  
8 measuring the labour market position cross-sectionally or with short-term transitions between  
9 labour market positions.  
10  
11  
12  
13  
14  
15  
16  
17  
18  
19

20  
21 The longitudinal design of this study has been an asset, as it made it possible to adjust for  
22 previous health and thereby reduced the possibility of reverse causation, and especially as the  
23 attrition rate was kept low. Concerning the generalisability of this study, this cohort has been  
24 shown by a previous assessment to be representative of Sweden as a whole concerning  
25 demographic data.[24] It is plausible that health effects of poor labour market attachment  
26 operate depending on the social context. For example, health implications might be more or  
27 less evident depending on structural factors such as national labour market policies, education  
28 system and legislation.[57] Sweden is part of the Scandinavian welfare regimes which are  
29 considered to have strong Social Democratic values and government-funded benefits during  
30 episodes of unemployment. The welfare state Sweden could therefore possibly reduce  
31 negative health effects of flexible employment,[58] which is in contrast to the results in our  
32 study. However, Swedish unions have criticised the current labour market regulations for  
33 being too liberal regarding temporary employment. With current regulations it is possible to  
34 hire a substitute for up to two years and after that hire the same person on a general temporary  
35 employment contract for up to two years. This causes a situation where people are at risk of  
36 becoming long-term temporary.[59] As a result of this approximately 10% of all temporary  
37 employees have been employed by the same employer for 5 years or more. The Swedish  
38  
39  
40  
41  
42  
43  
44  
45  
46  
47  
48  
49  
50  
51  
52  
53  
54  
55  
56  
57  
58  
59  
60

1  
2  
3 labour market regulation could therefore be a reason for the noticeable finding in this study,  
4  
5 where a substantial part of the workers followed remained poorly attached over the 12 years  
6  
7 which were examined. Long-term temporary employment could be a future problem, and also  
8  
9 a relevant group to study further in future research.  
10

11  
12  
13  
14  
15 The sample size was limited in this study, which is a pointer for potential future research,  
16  
17 which would benefit from analysing datasets with a larger sample size. Such studies would be  
18  
19 able to stratify analyses of gender or socioeconomic position, which could enrich the  
20  
21 understanding of the field of LMA and illness. In this study we have focused on poor LMA as  
22  
23 a risk factor for poor health, but there are a range of other circumstances relating to precarious  
24  
25 employment which could explain the results, such as vulnerability, lack of benefits, low  
26  
27 wages and disempowerment[44]. Therefore we would recommend future research to elaborate  
28  
29 on other aspects of precariousness linked to poor LMA, as well as exploring the validity of the  
30  
31 phenomena in a different context, e.g. countries with different social and labour policies.  
32  
33  
34  
35  
36  
37  
38

39 This study is based on self-reported data. Equivalent measures of self-rated health and  
40  
41 psychological distress have displayed good validity by predicting future mortality and  
42  
43 morbidity[60] even after adjustments for known health risks.[61] Furthermore, using  
44  
45 retrospective measurement of LMA history could lead to recall bias. Nevertheless,  
46  
47 retrospective questions about occupational history have been shown to maintain good quality  
48  
49 in terms of agreement with census data.[62]  
50  
51  
52  
53  
54

55 Further, the fact that we combined tracks could be seen as a limitation of this study. However,  
56  
57 in our understanding some of the tracks could be combined depending on their similar  
58  
59  
60



1  
2  
3 movement in the labour market. We first analysed each of the eight tracks separately in  
4  
5 relation to the outcome, to make sure that none of combinations resulted in blurring of the  
6  
7 results (data not shown). One limitation regarding the method was that, due to features of the  
8  
9 program, only half of the time points (12 of 24 possible time points) could be included in the  
10  
11 trajectory analysis. However, we used the first and second half of every second year to reduce  
12  
13 the possibility of systematic error due to seasonal variations in employment status.  
14  
15

16  
17  
18 The structure behind the conceptualisation of LMA needs consideration. The LMA structure  
19  
20 is based on the idea that there is a gradient in the labour market, with some positions being  
21  
22 more strongly attached to the labour market than others. We have used a modified version of  
23  
24 Aronsson's core-periphery model[32] to order the type of employment contract/situation,  
25  
26 from the most attached to the least attached to labour market. Our structure is indeed a  
27  
28 simplification of a more complex reality; this should be considered when interpreting the  
29  
30 results. The LMA variable and socioeconomic position are partly overlapping, as the group of  
31  
32 entrepreneurs is part of both the SEP classification and the LMA variable. This overlap could  
33  
34 cause over-adjustment in the logistic regression analysis. As these two variables partly  
35  
36 measure the same phenomenon, adjusting for socioeconomic position could adjust for part of  
37  
38 the true effect of LMA.  
39  
40  
41  
42  
43  
44  
45  
46

## 47 **Conclusions**

48  
49 Policymakers frequently promote flexible employment contracts. However, this study shows  
50  
51 that those with the most favourable but long-term high level attachment suffer from worse  
52  
53 health than those permanently attached. Further, despite a development towards favourable  
54  
55 employment circumstances, health discrepancies can endure, suggesting a potentially  
56  
57  
58  
59  
60

1  
2  
3 ‘scarring’ effect. Last, those poorly attached display the worst health situation, this partly due  
4  
5 to coexisting burdensome life circumstances. We firmly suggest that policymakers should  
6  
7 consider the results of this study and take responsibility for creating employment  
8  
9 opportunities suitable for maintaining a healthy working life, rather than promoting  
10  
11 employment contracts characterised by poor attachment to the labour market.  
12  
13  
14  
15  
16  
17  
18  
19  
20  
21  
22  
23  
24  
25  
26  
27  
28  
29  
30  
31  
32  
33  
34  
35  
36  
37  
38  
39  
40  
41  
42  
43  
44  
45  
46  
47  
48  
49  
50  
51  
52  
53  
54  
55  
56  
57  
58  
59  
60

For peer review only

## ACKNOWLEDGEMENT

Thanks to all the participants in the Northern Swedish Cohort. Liudmila Lipiäinen and Tapio Nummi are thanked for contributing to this paper with regard to the trajectory analysis.

## FUNDING

This work was supported by Swedish Council for Working Life and Social Research [2006-0950] the Medical Faculty at Umeå University and the Academy of Finland [grant number 132668 to PV]. The study has been financed by Formas dnr 259-2012-37.

## CONTRIBUTORSHIP STATEMENT

AH, PEG, PV and AW have substantially contributions to conception and design. AW and PEG have contributed to analysis and interpretation of data. AW, AH, PV and PEG have drafted the article and revising it critically for important intellectual content. All authors have given their final approval of the version to be published.

## DATA SHARING STATEMENT

See Hammarström and Janlert for details of the NSC data and procedures. The Northern Swedish Cohort is conducted at Umeå University. The dataset is not freely available, and researchers interested in collaboration should get into contact with the Principal Investigator, Anne Hammarström.

## COMPETING INTERESTS

None declared.

**REFERENCES**

- 1 OECD. Labour and Social Affairs. Incidence of temporary employment.: OECD  
2  
3  
4  
5  
6  
7 Online OECD Employment database [cited 12 December 2012, available at  
8  
9  
10  
11  
12  
13  
14  
15  
16  
17  
18  
19  
20  
21  
22  
23  
24  
25  
26  
27  
28  
29  
30  
31  
32  
33  
34  
35  
36  
37  
38  
39  
40  
41  
42  
43  
44  
45  
46  
47  
48  
49  
50  
51  
52  
53  
54  
55  
56  
57  
58  
59  
60
- 1 OECD. Labour and Social Affairs. Incidence of temporary employment.: OECD  
Online OECD Employment database [cited 12 December 2012, available at  
[www.oecd.org/employment/database](http://www.oecd.org/employment/database)  
2012.
- 2 Virtanen P, Lipiäinen L, Hammarström A, *et al.* Tracks of labour market attachment in  
early middle age: A trajectory analysis over 12 years. *Adv Life Course Res* 2011;**16**:55-64.
- 3 Furåker B, Berglund T. Changes of Employer, Employment Protection Legislation and  
Labour Market Attachment. *6:th Conference in Memory of Professor Marco Biagi*. Modena,  
Italy 2008.
- 4 Department for Transport. Data Sources for the Appraisal of Regeneration Impacts:  
TAG Unit 3.5.13 [accessed 18th Nov 2013 available at:  
<http://www.dft.gov.uk/webtag/documents/expert/pdf/unit3.5.13.pdf>]. Government of the  
United Kingdom 2011.
- 5 Dooley D, Fielding J, Levi L. Health and unemployment. *Anu Rev Publ Health*  
1996;**17**:449-65.
- 6 Hammarström A. Youth unemployment and ill health: results from a two-year follow-  
up study [in Swedish, summary in English]. Solna: Karolinska Institutet 1986.
- 7 McKee-Ryan FM, Song ZL, Wanberg CR, *et al.* Psychological and physical well-  
being during unemployment: A meta-analytic study. *J Appl Psychol* 2005;**90**:53-76.
- 8 Brenner H, Ahern W. Sickness absence and early retirement on health grounds in the  
construction industry in Ireland. *Occup Environ Med* 2000;**57**:615-20.

- 1  
2  
3 9 Mauno S, De Cuyper N, Kinnunen U, *et al.* Work characteristics in long-term  
4 temporary workers and temporary-to-permanent workers: A prospective study among Finnish  
5 health care personnel. *Econ Ind Democracy* 2012;**33**:357-77.  
6  
7  
8  
9  
10 10 Waenerlund AK, Virtanen P, Hammarström A. Is temporary employment related to  
11 health status? Analysis of the Northern Swedish Cohort. *Scand J Public Health* 2011;**39**:533-  
12 9.  
13  
14  
15 11 Waenerlund A-K. Temporary employment and illness. *Department of Public Health*  
16 *and Clinical medicine*. Umeå: Umeå University 2013.  
17  
18  
19  
20 12 Aronsson G, Dallner M, Lindh T, *et al.* Flexible pay but fixed expenses: Personal  
21 financial strain among on-call employees. *Int J Health Serv* 2005;**35**:499-28.  
22  
23  
24 13 Parker SK, Griffin MA, Sprigg CA, *et al.* Effect of temporary contracts on perceived  
25 work characteristics and job strain: A longitudinal study. *Pers Psychol* 2002;**55**:689-719.  
26  
27  
28  
29 14 Ferrie JE, Westerlund H, Virtanen M, *et al.* Flexible labor markets and employee  
30 health. *Scand J Work Environ Health* 2008:98-10.  
31  
32  
33  
34 15 Kim MH, Kim CY, Park JK, *et al.* Is precarious employment damaging to self-rated  
35 health? Results of propensity score matching methods, using longitudinal data in South  
36 Korea. *Soc Sci Med* 2008;**67**:1982-94.  
37  
38  
39  
40 16 Virtanen P, Vahtera J, Kivimaki M, *et al.* Employment security and health. *J*  
41 *Epidemiol Community Health* 2002;**56**:569-74.  
42  
43  
44 17 Virtanen P, Liukkonen V, Vahtera J, *et al.* Health inequalities in the workforce: the  
45 labour market core-periphery structure. *Int J Epidemiol* 2003;**32**:1015-21.  
46  
47  
48  
49 18 Bardasi E, Francesconi M. The impact of atypical employment on individual  
50 wellbeing: evidence from a panel of British workers. *Soc Sci Med* 2004;**58**:1671-88.  
51  
52  
53  
54 19 Virtanen P, Vahtera J, Kivimaki M, *et al.* Labor market trajectories and health: a four-  
55 year follow-up study of initially fixed-term employees. *Am J Epidemiol* 2005;**161**:840-46.  
56  
57  
58  
59  
60

- 1  
2  
3 20 Waenerlund AK, Gustafsson PE, Virtanen P, *et al.* Is the core-periphery labour market  
4 structure related to perceived health? findings of the Northern Swedish Cohort. *BMC Public*  
5 *Health* 2011;**11**:10.  
6  
7  
8  
9  
10 21 Broughton A, Biletta I, Kullander M. Flexible forms of work: 'very atypical'  
11 contractual arrangements. European Foundation for the Improvement of Living and Working  
12 Conditions 2010.  
13  
14  
15  
16 22 Liukkonen V, Virtanen P, Vahtera J, *et al.* Employment trajectories and changes in  
17 sense of coherence. *Eur J Public Health* 2010;**20**:293-8.  
18  
19  
20  
21 23 Nagin DS. Analyzing developmental trajectories: A semiparametric, group-based  
22 approach. *Psychol Methods* 1999;**4**:139-57.  
23  
24  
25 24 Hammarström A, Janlert U. Cohort Profile: The Northern Swedish Cohort. *Int J*  
26 *Epidemiol* 2011.  
27  
28  
29  
30 25 Jones SRG, Riddell WC. Unemployment and nonemployment: Heterogeneities in  
31 labor market states. *Rev Econ Stat* 2006;**88**:314-23.  
32  
33  
34 26 Grzywacz JG, Dooley D. "Good jobs" to "bad jobs": replicated evidence of an  
35 employment continuum from two large surveys. *Soc Sci Med* 2003;**56**:1749-60.  
36  
37  
38 27 Furåker B, & Berglund, T. *Changes of Employer, Employment Protection and Labour*  
39 *Market Attachment: An Analysis of Swedish Data from 1972-1998*. Gothenburg: University of  
40 Gothenburg 2008.  
41  
42  
43  
44 28 Laux R. Measuring labour market attachment using the Labour Force Survey. *Labour*  
45 *market trends [1361-4819]* 1997;**105 (10)**:407 (8).  
46  
47  
48  
49 29 Rousseau D, ed. *Psychological contracts in organizations: Understanding written and*  
50 *unwritten agreements*. Thousand Oaks, CA: Sage 1995.  
51  
52  
53  
54 30 Meyer J, Paunonen S., Gellatly I., & Goffin R. . Organizational commitment and job  
55 performance: It's the nature of commitment that counts. *J Appl Psychol* 1989;**74**:152-6.  
56  
57  
58  
59  
60

- 1  
2  
3 31 Greenhalgh L, Rosenblatt Z. Job insecurity: Toward conceptual clarity. *Acad Manage*  
4 *Rev* 1984;**9**:438-48.  
5  
6  
7 32 Aronsson G, Gustafsson K, Dallner M. Forms of employment, work environment and  
8 health in to a centre - periphery perspective. *Arbete och Hälsa (Work and Health)*. Stockholm:  
9 National Institute for Working Life 2000.  
10  
11  
12  
13 33 Statistics Sweden. Undersökning om levnadsförhållande [In English: Survey of living  
14 conditions]. Stockholm: Statistics Sweden 1980.  
15  
16  
17  
18 34 Hammarström A, Virtanen P, Janlert U. Are the health consequences of temporary  
19 employment worse among low educated than among high educated? *Eur J Public Health*  
20 2010.  
21  
22  
23  
24  
25 35 Siegrist J, Marmot M. Health inequalities and the psychosocial environment - two  
26 scientific challenges. *Soc Sci Med* 2004;**58**:1463-73.  
27  
28  
29 36 Black D, Morris JN, Townsend P, *et al*. Inequalities in Health. Report of a research  
30 working group. London: Department of Health and Social Security 1980.  
31  
32  
33  
34 37 Marmot M, Allen J, Goldblatt P, *et al*. Fair society, healthy lives: Strategic review of  
35 health inequalities in England post-2010 (the Marmot review). London: UCL 2010.  
36  
37  
38 38 Lynch J, Kaplan G. Socioeconomic Position. In: Berkman LF, Kawachi I, eds. *Social*  
39 *Epidemiology*. New York: Oxford University Press 2000:13-35.  
40  
41  
42  
43 39 Artazcoz L, Benach J, Borrell C, *et al*. Social inequalities in the impact of flexible  
44 employment on different domains of psychosocial health. *J Epidemiol Community Health*  
45 2005;**59**:761-67.  
46  
47  
48  
49 40 Statistics Sweden. Socioekonomisk indelning (SEI). Meddelande i samordningsfrågor  
50 1982:4 (Swedish Socioeconomic Classification). Stockholm: Statistics Sweden 1983.  
51  
52  
53  
54 41 Golsch K. Employment flexibility in Spain and its impact on transitions to adulthood.  
55 *Work Employ Soc* 2003;**17**:691-718.  
56  
57  
58  
59  
60

- 1  
2  
3 42 Waldron I, Weiss CC, Hughes ME. Interacting effects of multiple roles on women's  
4 health. *J Health Soc Behav* 1998;**39**:216-36.  
5  
6  
7 43 Aronsson G, Gustafsson K, Dallner M. Work environment and health in different  
8 types of temporary jobs. *Eur J Work Organ Psy* 2002;**11**:151-75.  
9  
10  
11 44 Vives A, Amable M, Ferrer M, *et al.* Employment Precariousness and Poor Mental  
12 Health: Evidence from Spain on a New Social Determinant of Health. *Journal of*  
13 *Environmental and Public Health [Epub 2013 Feb 3]* In press.  
14  
15  
16  
17  
18 45 Muthén B, & Muthén, L. . Integrating person-centered and variable-centered analyses:  
19 Growth mixture modeling with latent trajectory classes. *Alcohol Clin Exp Res* 2000;**24**:882-  
20  
21  
22  
23 91.  
24  
25 46 Tolvanen A. Latent growth mixture modelling: A simulation study. *Department of*  
26 *Mathematics and Statistics*. Finland: University of Jyväskylä 2007.  
27  
28  
29 47 Cockx B, Picchio M. Are Short-lived Jobs Stepping Stones to Long-Lasting Jobs? *Oxf*  
30 *Bull Econ Stat* 2012;**74**:646-75.  
31  
32  
33  
34 48 Statistics Sweden. Women and men in Sweden 2012. Örebro: Statistics Sweden 2012.  
35  
36 49 Mirowsky J, Ross C. *Social Causes of Psychological Distress*. New York: Aldine De  
37 Gruyter 2003.  
38  
39  
40 50 Strully KW. Job loss and health in the US labour market. *Demography* 2009;**46**:221-  
41  
42  
43 46.  
44  
45 51 Bartley M. Unemployment and Ill Health - Understanding the Relationship. *J*  
46 *Epidemiol Community Health* 1994;**48**:333-7.  
47  
48  
49 52 Ferrie JE. Is job insecurity harmful to health? *J R Soc Med* 2001;**94**:71-6.  
50  
51  
52 53 Tompa E, Scott-Marshall H, Dolinschi R, *et al.* Precarious employment experiences  
53 and their health consequences: towards a  
54  
55  
56 theoretical framework. *Work* 2007;**28**:209-24.  
57  
58  
59  
60



- 1  
2  
3 54 Facey ME, Eakin JM. Contingent work and ill-health: Conceptualizing the links. *Soc*  
4  
5 *Theory Health*;8:326-49.  
6  
7 55 Jung T, Wickrama KAS. An Introduction to Latent Class Growth Analysis and  
8  
9 Growth Mixture Modeling. *Social and Personality Psychology Compass* 2008;2:302-17.  
10  
11 56 Hynes K, Clarkberg M. Women's employment patterns during early parenthood: A  
12  
13 group-based trajectory analysis. *J Marriage Fam* 2005;67:222-39.  
14  
15 57 Guest DE, Isaksson K, De Witte H, et al. *Employment contracts, psychological*  
16  
17 *contracts, and worker well-being: an international study*. Oxford: Oxford University Press  
18  
19 2010.  
20  
21 58 Kim IH, Muntaner C, Shahidi FV, et al. Welfare states, flexible employment, and  
22  
23 health: A critical review. *Health Policy* 2012;104:99-127.  
24  
25 59 TCO. Additional comment from TCO regarding infringement procedure 2007/4835  
26  
27 against Sweden. Stockholm The Swedish Confederation for professional employees  
28  
29 [http://www.tco.se/Documents/Additionalcomments.pdf] 2013.  
30  
31 60 Weitoft GR, Rosén M. Is perceived nervousness and anxiety a predictor of premature  
32  
33 mortality and severe morbidity? A longitudinal follow up of the Swedish survey of living  
34  
35 conditions. *J Epidemiol Community Health* 2005;59:794-8.  
36  
37 61 Idler EL, Benyamini Y. Self-rated health and mortality: a review of twenty-seven  
38  
39 community studies. *J Health Soc Behav* 1997;38:21-37.  
40  
41 62 Wärneryd B, Thorslund M, Östlin P. The quality of retrospective questions about  
42  
43 occupational history--a comparison between survey and census data. *Scand J Soc Med*  
44  
45 1991;19:7-13.  
46  
47  
48  
49  
50  
51  
52  
53  
54  
55  
56  
57  
58  
59  
60

1  
2  
3 Figure 1. The number of cohort members clustered by trajectory analysis into eight tracks  
4  
5 (curves based on means of the attachment at the time points).  
6

7 Figure 2. Collapsed tracks of labour market attachment history. Permanent, high level,  
8  
9 strengthening and poor attachment.  
10  
11  
12  
13  
14  
15  
16  
17  
18  
19  
20  
21  
22  
23  
24  
25  
26  
27  
28  
29  
30  
31  
32  
33  
34  
35  
36  
37  
38  
39  
40  
41  
42  
43  
44  
45  
46  
47  
48  
49  
50  
51  
52  
53  
54  
55  
56  
57  
58  
59  
60

For peer review only

1  
2  
3  
4  
5 **History of labour market attachment as a determinant of ~~the~~ health status:**  
6 **a 12-year follow-up of the Northern Swedish Cohort**  
7  
8  
9

10  
11  
12 ANNA-KARIN WAENERLUND<sup>1</sup>, PER E GUSTAFSSON<sup>1</sup>, ANNE HAMMARSTRÖM<sup>1</sup>,  
13  
14 PEKKA VIRTANEN<sup>2,3</sup>  
15  
16  
17  
18  
19

20  
21 <sup>1</sup>Department of Public Health and Clinical Medicine, Family Medicine, Umeå University,  
22  
23 Umeå, Sweden.  
24

25  
26 <sup>2</sup>School of Health Sciences and Institute for Advanced Social Research, University of  
27  
28 Tampere, Finland.  
29

30  
31 <sup>3</sup> Department of Public Health and Clinical Medicine, Epidemiology and Global Health,  
32  
33 Umeå University, Umeå, Sweden.  
34  
35  
36  
37  
38

39  
40 Correspondence: Anna-Karin Waenerlund, Department of Public Health and Clinical  
41  
42 Medicine, Umeå University, SE-901 85, Umeå, Sweden. Telephone: +46 90 785 35 81. Fax  
43  
44 number: +46 90 77 68 83  
45

46  
47 E-mail address: [annakarin.waenerlund@fammed.umu.se](mailto:annakarin.waenerlund@fammed.umu.se)  
48

49  
50 Word count: 5087  
51

52  
53 Keywords: public health, psychological distress, employment, cohort, health, trajectory  
54  
55 analysis.  
56  
57  
58  
59  
60

## ABSTRACT

**Objective:** The present study aims at using trajectory analysis to measure labour market attachment (LMA) over 12 years and at examining whether labour market tracks relate to perceived health status.

**Design:** Data were retrieved from a 26-year prospective cohort study, the Northern Swedish Cohort.

**Setting and participants:** All 9th grade students (n=1083) within the municipality of Luleå in northern Sweden were included in the baseline investigation in 1981. The vast majority (94%) of the original cohort participated at the fourth follow-up. In this study, 969 participants were included.

**Measures:** Perceived health status (psychological distress and non-optimal self-rated health) at age 42 and the data obtained from questionnaires.

**Results:** We have identified four tracks in relation to LMA across the 12-year period: 'permanent', 'high level', 'strengthening' and 'poor level' of attachment. LMA history relates to psychological distress. High level (OR 1.55 (1.06-2.27)), strengthening (OR 1.95 (1.29-2.93)) and poor attachment (OR 3.14 (2.10-4.70)) involve higher OR for psychological distress compared to permanent attachment. The overall p-value remained significant in the final model (0.001). Analyses regarding non-optimal self-rated health displayed a similar pattern but this was not significant in the final model.

**Conclusions:** Our results suggest that health status in mid-life, particularly psychological distress, is related to patterns of LMA history, to a large part independently of other social risk factors and previous health. Consideration of heterogeneity and time in labour market attachment might be important when analysing associations with perceived health.

### Main strengths

- Using longitudinal data with exceptionally high response-rate
- Applying trajectory analysis which only has previously been sparsely used in this field
- Provides a uniquely rich and detailed data on temporary contracts over a long period of time

### Limitations

- Relies on self-reported data
- Used a relatively small sample

## INTRODUCTION

During the last three decades or so, demands for a more flexible workforce have increased all over the world. Flexibility in the labour market is reflected, for example, in the proportion of temporary employees, which in recent years has varied between 13 and 15% of the total working population in Europe.[1] To the individual, the consequence of the flexible employment means-is that attachment to a workplace is weak and commonly interrupted by unemployment and other episodes out of work. In order to capture the total spectrum of employment relations, both-with regard to both quality and quantity, we have chosen to work with the concept of 'labour market attachment' (LMA) in this study. In our definition of the LMA spectrum we have included permanent, non-permanent employment, unemployment and those who are exempted from working. [2-4]

1  
2  
3 Some relations between labour market status and health status are widely accepted: permanent  
4 employment is considered beneficial to health, while unemployment is known to have adverse  
5 health effects[5-7] and being out of the labour market in the long term is commonly due to  
6 poor health.[8] But when it comes to the health implications of labour market status, between  
7  
8  
9  
10  
11 the extremes of the LMA spectrum, the evidence is much scarcer. Previous studies have  
12  
13 proposed that temporary employment could be a risk of poor psychosocial work  
14  
15 characteristics [9] with temporary employees more commonly experiencing job insecurity  
16  
17 and having a low cash margin [10], which are some of the factors that can be a potential  
18  
19 pathways linking weak LMA to poor health. We have for example shown that long-term  
20  
21 temporary employees often experience difficulties to working full-time (underemployment)  
22  
23 which influences their financial situation in a negative way [11] and which can thus be a  
24  
25 source of worry.[12] Poor health could also be mediated through job strain, although it  
26  
27 seems as if this group is affected more by limited influence or control rather than high  
28  
29 demands.[13] Moderate LMA has been highlighted as potentially harmful for health status,  
30  
31 but research on the topic is divergent.[14] Whereas some studies report worse self-rated  
32  
33 health among temporary employees,[15] a few studies even suggest better self-rated health  
34  
35 among fixed-term employees.[16] Some studies also indicate that deterioration in self-rated  
36  
37 health may not be observable until the attachment is quite weak.[17] A major answer to the  
38  
39 mixed research results may lie in the inherent difficulty in capturing the changeable nature of  
40  
41 employment. Measurement of the employment situation at one or a few points in time, as in  
42  
43 most of the previous studies,[18, 19] may overlook the factual exposures to different  
44  
45 positions. Health effects of temporary employment could surface after several years of  
46  
47 accumulation, as we have shown in a previous report,[20] or even when several years have  
48  
49 passed after the exposure.[21] Moreover, it is possible that it is the chain of passages in  
50  
51 different employments, the trajectory of LMA, that contributes to health status. E.g. becoming  
52  
53  
54  
55  
56  
57  
58  
59  
60

1  
2  
3 more strongly attached over time could contribute to health status differently than becoming  
4  
5 less attached to the labour market even if the both groups holds same total exposure.  
6  
7  
8  
9

10  
11 There are a lot of studies about particular labour market statuses as predictors of health. An  
12  
13 inherent problem of such studies is the amount of exposure: cross-sectional information of  
14  
15 ~~the~~about status includes great variation, a variable based on ~~the~~ duration of the ongoing status  
16  
17 is bound to use cross-sectional health data, and in prospective follow-up settings there may be  
18  
19 periods in several statuses during the follow-up. The problem is of special importance in  
20  
21 research on the health effects of atypical employment, as there are a wide range of statuses  
22  
23 between permanent employment and overt unemployment. To address this topic, we have  
24  
25 introduced a score that sums up the exposure to different types of non-permanent employment  
26  
27 during the follow-up [20]. The score, however, does not take into account ~~the~~ timing of the  
28  
29 exposures. One way to capture the status chains, or the passages in and the transitions  
30  
31 between different labour market positions, is provided by trajectory analysis. Applying this  
32  
33 method with a ~~four~~-~~four~~-class response variable (permanent employment, non-permanent  
34  
35 employment, unemployment and out of the labour force) the members of the Northern  
36  
37 Swedish Cohort have been clustered ~~into~~into six different 'labour market attachment  
38  
39 tracks'[2]. For the trajectory analysis of the present study, labour market attachment was  
40  
41 measured by a ~~ten~~-class indicator, in order to articulate in more detail the trajectories of non-  
42  
43 permanent employment and their association with health.  
44  
45  
46  
47  
48  
49  
50  
51  
52

53 The few available studies about labour market trajectories in ~~the~~ field of public health have  
54  
55 measured LMA ~~in~~at a few time points, e.g. between one time point ~~to~~and another[9] and the  
56  
57 goal has been descriptive rather than analytic.[19, 22] In the present study, we have applied a  
58  
59  
60

1  
2  
3 refined scale with regard to LMA. In the measure we have included a spectrum of types of  
4  
5 employment situations and also covered a time-span of 12 years. –The method, trajectory  
6  
7 analysis[23], offers a novel way to identify differential tracks of LMA history in our  
8  
9 population cohort. After obtaining a relevant set of tracks, our aim is to examine in which  
10  
11 ways they relate to non-optimal self-rated health or perceived psychological distress.  
12  
13

## 14 15 16 **METHOD**

### 17 18 **Population and procedures**

19  
20  
21 The study was initiated in 1981 and included all pupils in their last year of compulsory school  
22  
23 (n=1083), in the medium-sized industrial town of Luleå in northern Sweden (95% of the  
24  
25 cohort were born in 1965). Since 1981 four additional follow-ups have been conducted.[24]  
26  
27

28 The attrition rate in the most recent follow-up from 2007 was low; 94% (n=1005) of the  
29  
30 original cohort who were still alive (n=1071) participated. Comprehensive questionnaires,  
31  
32 completed by the participants in 1981, 1983, 1986, 1995 and 2007, were used as the main  
33  
34 assessment method. This paper is based on data from the 1995 and 2007 follow-ups.  
35  
36

37 Procedures of data collection are described more extensively elsewhere.[24] The study was  
38  
39 approved by the Regional Ethical Review Board in Umeå, Sweden.  
40  
41  
42  
43  
44

### 45 46 **Measurements**

47  
48 LMA history

49  
50  
51 We name the response variable of the trajectory analysis as “labour market attachment”  
52  
53 (LMA). It aims to serve as a conceptual and empirical tool to sort out the employment statuses  
54  
55 of the post-industrial labour market into along a continuum.[25, 26] Crudely, it “refers to  
56  
57 whether or not people have continuous employment (for example all year or only part of it)  
58  
59  
60



1  
2  
3 and whether or not they have periods of unemployment” [27] At headline level [28] there  
4  
5 are four major classes of LMA: non-employment, unemployment, temporary employment and  
6  
7 permanent employment. Within each class, several subclasses can be discerned. In the present  
8  
9 study, the interest is focused ds on differential temporary employment. Seen through LMA,  
10  
11 temporary employment covers a set of positions defined by formal job contracts, regardless of  
12  
13 the psychological contract, [29] job commitment [30] or perceived job insecurity.[31]  
14  
15

16  
17  
18  
19  
20 Participants’ labour market position from 1996 to 2007 was measured with a matrix  
21  
22 consisting of columns representing half-year periods and rows representing different labour  
23  
24 market positions. With the instruction ‘During which periods have you been employed  
25  
26 permanently or have had some type of temporary job contract or have been out of work?’ the  
27  
28 respondents were prompted to choose between 11 response options for each six-month period:  
29  
30 ‘permanently employed’ (coded as 10), ‘entrepreneur’ (9), ‘employed in project’ (8),  
31  
32 ‘substitute’ (7), ‘probationary employment’ (6), ‘on-demand worker’ (5), ‘seasonal worker’  
33  
34 (4), ‘temporary employee for other reasons’ (3), ‘in employment policy measure’ (2),  
35  
36 ‘unemployed’ (2), ‘out of the labour market’ (1). Unemployment and participation in policy  
37  
38 measure were merged, and each option was coded to a variable that expressed the strength of  
39  
40 LMA on a scale from 10 to 1. The ranking of contracts has been tested in previous research on  
41  
42 the accumulation of temporary employment[20] and was based on Aronsson’s core-periphery  
43  
44 model-model,[32] which proposes that there is a health gradient in relation to the type of  
45  
46 employment contract. The model ranks contracts based on duration, possibility of on-the-job  
47  
48 training, autonomy, and job security. [32] However, we have extended the ranking by also  
49  
50 including three labour market positions of non-employment. In the event of ‘out of labour  
51  
52 market’, a continuum of five or more periods (i.e. 2.5 years) was required: if there were fewer  
53  
54 than five, all periods were coded according to the last labour market position, to purposely  
55  
56  
57  
58  
59  
60

1  
2  
3 exclude those on parental leave or studying from this category. As the last category 'out of  
4 labour market' was given the lowest score in relation to LMA. The intention for this group  
5 was that it was supposed to be contained by those mainly on sickness benefit (supported by  
6 analysis, data not shown), not those temporarily not working due to parental leave or  
7 education). These operations thus yielded a score of the strength of LMA for each of the 24  
8 successive half-year periods. The scores served as the data for the trajectory analysis.  
9  
10  
11  
12  
13  
14  
15  
16  
17  
18  
19

#### 20 Indicators of health status

21  
22  
23 *Psychological distress at age 30 and 42* was measured with a question that inquired whether  
24 the respondent during the last year had experienced any of the following symptoms:  
25 restlessness, concentration problems, being worried or anxious, palpitations, anxiety or panic  
26 or other nervous problems. Reporting one or more of the six symptoms was coded as 1 and  
27 none as 0, equalling a dichotomisation into the quartile with the most symptoms versus the  
28 rest. The question was derived from the 'Survey of living conditions'. [33]  
29  
30  
31  
32  
33  
34  
35  
36  
37  
38  
39

40 *Non-optimal self-rated health at age 30 and 42*, was measured with one question, 'How do  
41 you rate your general health?', with response options: good, average or bad. [33] The  
42 responses were dichotomised into the quartile with the worst health (average or bad) coded as  
43 1, and the rest (good) coded as 0. [10, 34]  
44  
45  
46  
47  
48  
49  
50  
51  
52  
53  
54  
55  
56  
57  
58  
59  
60

## Covariates

Socio-economic position is a strong predictor of health [35-38]. LMA has been shown to be related to occupational class class.[39] It is important to consider socio-economic position as a possible confounder when studying the relationship between temporary employment and illness. In this study *Socioeconomic position (SEP) in 2007* was based on one question about occupation, which was classified according to the Swedish socioeconomic classification of occupational categories.[40] Upper white-collar and self-employed were coded as 0, lower white-collar workers were coded as 1 and blue-collar workers were coded as 2.

Partnership and parenthood are also important factors in relation to LMA as these two may be postponed due to insecure working arrangement [39, 41], which could influence social aspects related to illness [39]. Marriage or having a partner is also important to consider when studying LMA, as it can be beneficial to health and financial resources [42]. *Parental status in 2007*, was coded as 0 for those having children and as 1 for the childless. *Marital status in 2007* was measured with one question: 'Are you married or co-habiting?' Yes was coded as 0 and no as 1.

More women than men have poor LMA in terms of temporary employment. [43] Gender has been considered as an important factor in relation to poor LMA and illness, where women's health might be at greater risk. [44] *Women* were coded as 0 and *Men* as one.

## Statistics

The participants were clustered according to the development of their LMA over the 12 years applying trajectory analysis.[23] The method has been established as a way of studying individual developmental courses over age or time, and for identifying distinctive groups of individual trajectories within the population that emerge, instead of predefined criteria, from the data itself. Trajectory analysis consists of three steps. First, the appropriate probabilistic

1  
2  
3 model is chosen for the response variable. ~~Second~~The second step is to define the degree of  
4 the polynomial form of the trajectories. Finally, the number of the clusters is decided,  
5 employing the statistical information criteria and the 'common sense criteria' with respect to  
6 the substance and aims of the study. As a result, the developmental trajectories within clusters  
7 are as similar as possible, and trajectories between clusters are as different as possible.[45] At  
8 individual level, cluster membership is dictated by the highest calculated posterior probability  
9 of belonging to a particular cluster.  
10  
11  
12  
13  
14  
15  
16  
17  
18  
19  
20  
21

22 Trajectory analyses were conducted with the Mplus program package. The analysis allowed  
23 for 12 time points, and the first and the second half of every second year were chosen in order  
24 to take into account possible systematic seasonal variation of LMA.  
25  
26  
27  
28  
29  
30  
31  
32

33 We used logistic regression (odds ratio and 95% CI) to test whether LMA history was  
34 associated with non-optimal self-rated health and psychological distress at age 42.

35 Adjustments were made for the health indicator at age 30, gender, socioeconomic position,  
36 parental status and marital status. SPSS v17 was used for the regression analyses. Women and  
37 men were analysed together to preserve power.  
38  
39  
40  
41  
42  
43  
44  
45  
46  
47

## 48 RESULTS

49  
50 The data consists of a ~~ten~~10-class ordinal indicator of LMA, and the form of probability  
51 distribution of longitudinal sequence of measurement for such variable is the multinomial  
52 distribution.  
53  
54  
55  
56  
57  
58  
59  
60

1  
2  
3  
4  
5  
6 The adjusted Bayesian information criterion (BIC) value decreased from 17435.474 for the  
7  
8 linear model to 16656.622 for the quadratic polynomial model, indicating that the latter can  
9  
10 be preferred ~~over to~~ the former. Other information criteria provided by the Mplus program ~~as~~  
11  
12 ~~well~~ likewise pointed in the same direction.  
13  
14

15  
16  
17  
18 ~~Optimal~~ The optimal number of trajectories was searched by checking the solutions up to  
19  
20 nine. The adjusted Bayesian information criterion (Adj. BIC) was used for choosing the  
21  
22 solution.[46] The Adj. BIC value (as well as the other information criteria) decreased when  
23  
24 the number of trajectories was increased, rapidly ~~in at~~ the beginning and slower ~~in at~~ the end.  
25  
26 From seven-trajectory to eight-trajectory solution the figure decreased from 17856.940 to  
27  
28 17606.402. Thereafter the decrease slowed down. We decided to continue with eight  
29  
30 trajectories, as this solution provided, in addition to detailed depiction of differential LMA,  
31  
32 the opportunity to exclude the cluster with zero LMA that was ~~out of~~ ~~side~~ our research interest.  
33  
34  
35  
36  
37  
38  
39

40 Figure 1 illustrates the 'labour market tracks' based on means of the LMA scores at each time  
41  
42 point of the individuals classified into each trajectory. Individuals on track 1 (3% of the  
43  
44 cohort) also were excluded, as they were mainly disability pension recipients and their health  
45  
46 was poor by definition. The track of 'permanent' employment throughout the follow-up  
47  
48 included more than half of the cohort, whereas the remaining six clusters were relatively small  
49  
50 and there were relatively similar tracks. We collapsed these six clusters into three as follows.  
51  
52 A considerable part (tracks 2 and 3) maintained a continuously 'high level' of attachment, and  
53  
54 about 12% (tracks 5 and 7) displayed a 'strengthening' of attachment towards the end of the  
55  
56 follow-up. The attachment was permanently weak in about ~~one~~ ~~1~~ of 10 (track 8), and a small  
57  
58  
59  
60

cluster with a U-shaped pattern (track 4) was also seen; we decided to collapse these clusters and defined their attachment as 'poor'. In addition to being substantially grounded, this collapsing provided statistical power for subsequent analyses. Thus, we arrived at a four class 'LMA history' variable that comprised 'permanent', 'high level', 'strengthening' and 'poor' LMA (Figure 2).

(Figure 1 here)

Table 1. Distribution (%) of dependent and independent variables in relation to LMA history. All values are displayed in %, except p-values.

|                               | n=550     | n=163      | n=126         | n=130 | P-value          |
|-------------------------------|-----------|------------|---------------|-------|------------------|
|                               | Permanent | High level | Strengthening | Poor  | ( $\chi^2$ test) |
| Track                         | 0         | 1          | 2             | 3     |                  |
| Dependent variables age 42    |           |            |               |       |                  |
| Psychological distress        | 26.3      | 35.7       | 41.0          | 52.8  | <0.001           |
| Non-optimal self-rated health | 29.1      | 36.2       | 39.2          | 48.1  | <0.001           |
| Independent variables         |           |            |               |       |                  |
| Health status at age 30       |           |            |               |       |                  |
| Psychological distress        | 19.4      | 27.3       | 36.3          | 31.9  | <0.001           |
| Non-optimal self-rated health | 16.8      | 29.4       | 26.6          | 33.3  | <0.001           |
| Sociodemographics             |           |            |               |       |                  |
| Blue-collar worker            | 33.5      | 25.8       | 35.7          | 47.7  | <0.001           |
| Lower white-collar worker     | 15.7      | 8.0        | 18.3          | 6.2   |                  |
| Upper white-collar worker     | 50.8      | 66.3       | 46.0          | 46.2  |                  |
| Single marital status         | 19.1      | 20.9       | 22.2          | 32.6  | 0.010            |
| No child as parental status   | 17.3      | 16.6       | 15.1          | 19.4  | 0.831            |
| Women                         | 44.5      | 42.3       | 61.9          | 55.4  | 0.001            |

Table 1 shows the distribution of the key variables by LMA history. In general, LMA history with less strong attachment entailed poorer health at age 42. Concerning covariates, similar patterns were seen for psychological distress and non-optimal self-rated health at age 30, thus indicating that health status differed between LMA history already at baseline. There were also significant differences with regard to socioeconomic position; the proportion of blue-

collar workers was highest in the group with poor attachment to the labour market. The poor attachment group was also most likely to be living without a partner ( $p=.010$ ). Parental status did not differ between the groups. The proportion of women was higher in strengthening and poor level attachment, whereas the permanent and high level attachment were dominated by men ( $p=.001$ ).

Table 2. Odds ratios (OR) and 95% confidence intervals (CI) for psychological distress and non-optimal self-rated health at age 42 as dependent variable for LMA history over 12 years as main exposure after adjustment for health status age 30, sociodemographic variables.

| Psychological distress as outcome        |       |                  |                  |                  |                  |
|------------------------------------------|-------|------------------|------------------|------------------|------------------|
| Trajectories                             |       | Model 0          | Model 1          | Model 2          | Model 3          |
| Permanent                                | n=550 | 1                | 1                | 1                | 1                |
| High level                               | n=163 | 1.55 (1.06–2.27) | 1.56 (1.06–2.30) | 1.50 (0.99–2.28) | 1.54 (1.01–2.35) |
| Strengthening                            | n=126 | 1.95 (1.29–2.93) | 1.77 (1.17–2.69) | 1.68 (1.07–2.66) | 1.57 (0.99–2.49) |
| Poor                                     | n=130 | 3.14 (2.10–4.70) | 2.77 (1.83–4.19) | 2.87 (1.83–4.49) | 2.52 (1.59–3.98) |
| P-value for LMA                          |       | <0.001           | <0.001           | <0.001           | 0.001            |
| Non-optimal self-rated health as outcome |       |                  |                  |                  |                  |
| Trajectories                             |       | Model 0          | Model 1          | Model 2          | Model 3          |
| Permanent                                | n=550 | 1                | 1                | 1                | 1                |
| High level                               | n=163 | 1.38 (0.96–2.00) | 1.46 (1.00–2.13) | 1.19 (0.81–1.76) | 1.26 (0.85–1.87) |
| Strengthening                            | n=126 | 1.57 (1.05–2.36) | 1.52 (1.00–2.29) | 1.44 (0.94–2.20) | 1.40 (0.91–2.16) |
| Poor                                     | n=130 | 2.26 (1.53–3.34) | 2.00 (1.34–3.00) | 1.83 (1.21–2.77) | 1.65 (1.08–2.53) |
| P-value for LMA                          |       | <0.001           | 0.003            | 0.025            | 0.087            |

Model 0 crude odds ratios

Model 1 odds ratios adjusted for sociodemographic variables (socioeconomic position, gender, marital status and parental status).

Model 2 odds ratios adjusted for health status at age 30

Model 3 odds ratios adjusted for models 1+2.

To analyse whether LMA history was related to poor health, self-rated health and psychological distress were regressed on LMA history with permanent attachment as the reference category, in multiple logistic regression models (Table 2). The LMA history had a significant overall p-value on both health outcomes. In unadjusted analyses with

1  
2  
3 psychological distress, lower strength of attachment involved higher odds than permanent  
4 (Table 2, Model 0; LMA history  $p < 0.001$ ). In model 0 we found increased OR in relation to  
5 lower attachment to the labour market, ranging from high level OR 1.55 (CI 1.06–2.27),  
6  
7 strengthening OR 1.95 (CI 1.29–2.93), and poor OR 3.14 (CI 2.10–4.70). Adjusting for  
8  
9 covariates (sociodemographic and psychological distress at age 30, Models 1 and 2,  
10  
11 respectively) resulted in attenuation of the ORs for those with ‘strengthening’ and ‘poor’  
12  
13 attachment. Lastly, in the fully adjusted models (Model 3) only the high level and poor  
14  
15 attachment were significantly related to psychological distress, with the ‘poorly’ attached  
16  
17 displaying the numerically strongest association (OR=2.52 CI 1.59–3.98). Although  
18  
19 borderline significant, the OR for the ‘strengthening’ (OR=1.57 CI 0.99–2.49) attachment was  
20  
21 of comparable strength to the ‘high level’ attachment (OR=1.54 CI 1.01–2.35). While with a  
22  
23 slight decrease in OR along with adjustments for sociodemographic factors and previous  
24  
25 health, the same pattern is still evident in the final model, and the overall p value remained  
26  
27 highly significant ( $p = .001$ ).  
28  
29  
30  
31  
32  
33  
34  
35  
36  
37

38 Results for non-optimal self-rated health were slightly less prominent than for psychological  
39  
40 distress but pointed in the same direction. Unadjusted models (Table 2, Model 0) showed a  
41  
42 significant overall relationship between LMA history and self-rated health ( $p < .001$ ), and the  
43  
44 LMA history with ‘strengthening’ (OR= 1.57 CI 1.05–2.36) and ‘poor’ (OR=2.26 CI 1.53–  
45  
46 3.34) attachment had higher odds of having non-optimal self-rated health. For those with  
47  
48 ‘high level’ (OR=1.38 CI 0.96–2.00) of attachment the risk was numerically higher, although  
49  
50 not significantly, than for those with ‘permanent’ attachment. After adjustment for health  
51  
52 status at age 30 (Model 2) the results for the ‘strengthening’ group were attenuated below  
53  
54 significance. In the final model, only the OR for the ‘poor’ attachment group was significantly  
55  
56  
57  
58  
59  
60



1  
2  
3 high, while the overall p-value for the association of LMA history with non-optimal health  
4  
5 dropped to borderline significance (p=.087).  
6  
7  
8  
9

## 10 11 **DISCUSSION**

12  
13  
14 In this study we have identified four tracks of LMA history over 12 years: permanent, high  
15  
16 level, strengthening and poor. Compared to the cohort with ‘permanent’ attachment, we found  
17  
18 a higher probability of psychological distress among three cohorts with non-permanent LMA.  
19  
20 The differences were partially attributed to previous health and to some extent also to  
21  
22 sociodemographic variables; nevertheless, the overall contribution of LMA history remained  
23  
24 significant in the fully adjusted model. The results for non-optimal self-rated health were  
25  
26 similar but somewhat weaker.  
27  
28  
29  
30  
31  
32

33  
34 Much of the previous research has suggested that temporary employment is a stepping stone  
35  
36 towards more stable employment.[47] In the present study we found that, although the greater  
37  
38 part of the sample already had a fairly strong attachment or were moving towards stronger  
39  
40 attachment, one track remained poorly attached to the labour market over the 12 years. Thus,  
41  
42 while the stepping stone hypothesis might be correct for the majority, a substantial minority  
43  
44 appear to be trapped in an employment situation of permanent temporariness. Further, we  
45  
46 found more women than men in this least favourable situation. This is probably explained by  
47  
48 the widespread use of ‘on-demand employment contracts’ in women-dominated sectors of  
49  
50 business[43] such as care and welfare and education [48] which are two industries which  
51  
52 together stands for 33% of all temporary contracts in Sweden[11]. These results can be  
53  
54 interpreted as showing that, even though Sweden is considered one of the top-ranked gender  
55  
56  
57  
58  
59  
60

gender-equal countries; with regard to high labour market participation among women, and the internal labour market is still gender-segregated.

Our findings importantly suggest that in addition to the present LMA, the LMA history is important for health. In line with previous research we found that the group with least attachment had the worst health status.[15, 17] As in our previous report showing a cumulative effect of temporary employment on health status,[20] the present report further corroborates that employment history impacts on health status. However, a more nuanced picture emerged when the separate labour market tracks were considered.

First, even those with ‘high level’ attachment experienced psychological distress more commonly than those with ‘permanent’ attachment. Thus, it appears that even marginal exposure to what could be labelled ‘LMA stress’, can contribute to psychological distress over time.

Second, the group with ‘strengthening’ attachment, still experienced poor health more commonly than those with permanent attachment, even after adjustments for sociodemographic variables. This result suggests that earlier suboptimal attachment has a potentially ‘scarring’ effect. It is important to point out that in cross-sectional or short-term longitudinal designs, the ‘strengthening’ group would have been regarded as having a fairly favourable labour market attachment. This particular finding therefore stresses the importance of taking the specific patterns of the long-term labour market history into account when examining associations with health status.

1  
2  
3 Third, among those poorly attached to the labour market is where we found the highest ORs  
4  
5 for poor health. The poorly attached were also more likely to have other risk factors for  
6  
7 psychological distress, which seemed to partly account for the association. For example, being  
8  
9 single involves a lower average household income and decreases the level of control [49], and  
10  
11 poor previous health could also contribute to difficulties getting a stable attachment to the  
12  
13 labour market, as those with health troubles could be less employable, particularly for blue-  
14  
15 collar occupations[50]. The poorly attached are also those with most experience of  
16  
17 unemployment, which previously has been connected to mortality and morbidity[5, 51]. Thus,  
18  
19 the poor mental health in this group seems to be a result not only of their enduringly  
20  
21 unfavourable LMA history, but also of a range of coexisting burdensome life circumstances.  
22  
23

24  
25 As described in the introduction job insecurity, financial stress, lack of reciprocity,  
26  
27 uncertainty, and lack of autonomy are some of the broad range of potential pathways linking  
28  
29 temporary employment to poor health in previous studies [9, 10, 15, 52-54]. Although  
30  
31 mediating mechanisms has not been within the scope of this paper, our results can be  
32  
33 understood in the light of potential pathways presented in previous research.  
34  
35  
36  
37  
38  
39

### 40 **Methodological considerations**

41  
42  
43 Our study relies on trajectory analysis, a method that became available in the beginning of the  
44  
45 2000s, largely by virtue of increased computing power. Instead of prefixing alternative  
46  
47 developments, the analysis is seeking developmental trajectories that emerge from the data  
48  
49 itself [17]. It gives each individual posterior probability values for each trajectory, and  
50  
51 allocates them according to the highest probability into groups or categories so that  
52  
53 individuals within a group are more similar than individuals between groups [55]. To our  
54  
55 knowledge, trajectory analysis has been used only sparsely in previous studies about  
56  
57  
58  
59  
60

1  
2  
3 LMA.[56] Our previous research using a core-periphery structure has only yielded a measure  
4  
5 summarising the total accumulation of peripheral employment over 12-years,[20] whereas,  
6  
7 this study has added new knowledge to the field by showing when exposure is taking place  
8  
9 and has provided patterns of labour market history, and this specific knowledge has hinted  
10  
11 about potential scarring effects of poor LMA (seen in the strengthening group) which is a  
12  
13 knowledge that has previously been hidden due to methodological limitations. In general, this  
14  
15 study represents novel methodological ideas in a research area that has been obscured by the  
16  
17 practice of measuring the labour market position cross-sectionally or with short-term  
18  
19 transitions between labour market positions.  
20  
21  
22  
23  
24

25 The longitudinal design of this study has been an asset, as it made it possible to adjust for  
26  
27 previous health and thereby reduced the possibility of reverse causation, and especially as the  
28  
29 attrition rate was kept low. Concerning the generalisability of this study, this cohort has been  
30  
31 shown by a previous assessment to be representative of Sweden as a whole concerning  
32  
33 demographic data.[24] It is plausible that health effects of poor labour market attachment  
34  
35 operate depending on the social context. For example, E.g. that health implications might be  
36  
37 more or less evident depending on structural factors such as national labour market policies,  
38  
39 education system and legislation.[57] Sweden is part of the Scandinavian welfare regimes  
40  
41 which are considered to have strong Social Democratic values and government-funded  
42  
43 benefits during episodes of unemployment. The welfare state Sweden could therefore  
44  
45 possibly reduce negative health effects of flexible employment,[58] which is in contrast to  
46  
47 the results in our study. However, Swedish unions have criticised the current labour market  
48  
49 regulations for being too liberal regarding temporary employment. With current regulations it  
50  
51 is possible to hire a substitute for up to two years and after that hire the same person on a  
52  
53 general temporary employment contract for up to two years. This causes a situation where  
54  
55  
56  
57  
58  
59  
60

1  
2  
3 people are at risk of becoming long-term temporary.[59] As a result of this approximately  
4  
5 10% of all temporary employees have been employed by the same employer for 5 years or  
6  
7 more. The Swedish labour market regulation could therefore be a reason ~~to~~ for the noticeable  
8  
9 finding in this study, where a substantial part of the workers followed remained poorly  
10  
11 attached over the 12 years which were examined. Long-term temporary employment  
12  
13 could be a future problem, and also a relevant group to study further in future research.  
14  
15  
16  
17  
18  
19

20 ~~Sample-~~The sample size was limited in this study, which is a pointer for ~~ing to~~ potential future  
21  
22 research, which would benefit from analysing datasets with a larger sample size. Such  
23  
24 studies would be able to stratify analysis of gender or socioeconomic position, ~~this which~~  
25  
26 could enrich the understanding of the field of LMA and illness. In this study we have focused  
27  
28 on poor LMA as a risk factor for poor health, ~~but~~ there are however a range of other  
29  
30 circumstances ~~the relatinges~~ to precarious employment which could explain the results, such  
31  
32 as vulnerability, lack of benefits, low wages ~~and~~ disempowerment[44]. Therefore we would  
33  
34 recommend future research to elaborate on other aspects of precariousness linked to poor  
35  
36 LMA, as well as exploring the validity of the phenomena in a different context, e.g.  
37  
38 ~~countries~~ with different social and labour policies.  
39  
40  
41  
42  
43  
44

45 This study is based on self-reported data. Equivalent measures of self-rated health and  
46  
47 psychological distress have displayed good validity by predicting future mortality and  
48  
49 morbidity[60] even after adjustments for known health risks.[61] Furthermore, using  
50  
51 retrospective measurement of LMA history could lead to recall bias. Nevertheless,  
52  
53 retrospective questions about occupational history have been shown to maintain good quality  
54  
55 in terms of agreement with census data.[62]  
56  
57  
58  
59  
60

1  
2  
3  
4  
5 Further, the fact that we combined tracks could be seen as a limitation of this study. However,  
6  
7 in our understanding some of the tracks could be combined depending on their similar  
8  
9 movement in the labour market. We first analysed each of the eight tracks separately in  
10  
11 relation to the outcome, to make sure that none of combinations resulted in blurring of the  
12  
13 results (data not shown). One limitation regarding the method was that, due to features of the  
14  
15 program, only half of the time points (12 of 24 possible time points) could be included in the  
16  
17 trajectory analysis. However, we used the first and second half of every second year to reduce  
18  
19 the possibility of systematic error due to seasonal variations in employment status.  
20  
21  
22  
23  
24

25 The structure behind the conceptualisation of LMA needs consideration. The LMA structure  
26  
27 is based on the idea that there is a gradient in the labour market, with some positions being  
28  
29 more strongly attached to the labour market than others. We have used a modified version of  
30  
31 Aronsson's core-periphery model[32] to order the type of employment contract/situation,  
32  
33 from the most attached to the least attached to labour market. Our structure is indeed a  
34  
35 simplification of a more complex reality; this should be considered when interpreting the  
36  
37 results. The LMA variable and socioeconomic position ~~is~~ are partly overlapping, as the group  
38  
39 of entrepreneurs ~~both~~ is part of both the SEP classification and the LMA variable. This  
40  
41 overlap could cause ~~over~~ over-adjustment in the logistic regression analysis. As these two  
42  
43 variables partly measure the same phenomenon, adjusting for socioeconomic position could  
44  
45 adjust for part of the true effect of LMA.  
46  
47  
48  
49  
50  
51  
52  
53

## 54 Conclusions

55  
56 Policymakers frequently promote flexible employment contracts. However, this study shows  
57  
58  
59  
60

1  
2  
3 that those with the most favourable but long-term high level attachment suffer from worse  
4  
5 health than those permanently attached. Further, despite a development towards favourable  
6  
7 employment circumstances, health discrepancies can endure, suggesting a potentially  
8  
9 ‘scarring’ effect. Last, those poorly attached display the worst health situation, this partly due  
10  
11 to coexisting burdensome life circumstances. We firmly suggest that policymakers should  
12  
13 consider the results of this study and take responsibility for creating employment  
14  
15 opportunities suitable for maintaining a healthy working life, rather than promoting  
16  
17 employment contracts characterised by poor attachment to the labour market.  
18  
19

## 20 21 **ACKNOWLEDGEMENT**

22  
23  
24 Thanks to all the participants in the Northern Swedish Cohort. Liudmila Lipiäinen and Tapio  
25  
26 Nummi are thanked for contributing to this paper with regard to the trajectory analysis.  
27  
28

## 29 30 **COMPETING INTERESTS**

31  
32  
33 None declared.  
34

## 35 36 **FUNDING**

37  
38  
39 This work was supported by Swedish Council for Working Life and Social Research [2006-  
40  
41 0950] the Medical Faculty at Umeå University and the Academy of Finland [grant number  
42  
43 132668 to PV]. The study has been financed by Formas dnr 259-2012-37.  
44  
45  
46  
47  
48  
49  
50  
51  
52  
53  
54  
55  
56  
57  
58  
59  
60

#### Key messages

- There is controversy [as to](#) whether being less attached to the labour market is related to poor health or not.
- This unclarity might partly stem from the failure to take heterogeneous employment histories into consideration
- We have applied trajectory analysis ~~on~~[to](#) 12-year labour market history and found associations between labour market attachment and health status.
- Those with high level, strengthening and poor level of non-permanent attachment displayed worse health status than those in permanent employment [in](#) the entire 12-year period.
- Our findings illustrate the temporal complexities of labour market attachment's impact on health over time

peer review only



**REFERENCES**

- 1 OECD. Labour and Social Affairs. Incidence of temporary employment.: OECD  
2  
3  
4  
5  
6  
7 Online OECD Employment database [cited 12 December 2012, available at  
8  
9  
10 [www.oecd.org/employment/database](http://www.oecd.org/employment/database)  
11  
12  
13 2012.
- 14  
15  
16 2 Virtanen P, Lipiäinen L, Hammarström A, *et al.* Tracks of labour market attachment in  
17  
18 early middle age: A trajectory analysis over 12 years. *Adv Life Course Res* 2011;**16**:55-64.
- 19  
20 3 Furåker B, Berglund T. Changes of Employer, Employment Protection Legislation and  
21  
22 Labour Market Attachment. *6:th Conference in Memory of Professor Marco Biagi*. Modena,  
23  
24 Italy 2008.
- 25  
26  
27 4 Department for Transport. Data Sources for the Appraisal of Regeneration Impacts:  
28  
29 TAG Unit 3.5.13 [accessed 18th Nov 2013 available at:  
30  
31 <http://www.dft.gov.uk/webtag/documents/expert/pdf/unit3.5.13.pdf>]. Government of the  
32  
33 United Kingdom 2011.
- 34  
35  
36 5 Dooley D, Fielding J, Levi L. Health and unemployment. *Anu Rev Publ Health*  
37  
38 1996;**17**:449-65.
- 39  
40 6 Hammarström A. Youth unemployment and ill health: results from a two-year follow-  
41  
42 up study [in Swedish, summary in English]. Solna: Karolinska Institutet 1986.
- 43  
44 7 McKee-Ryan FM, Song ZL, Wanberg CR, *et al.* Psychological and physical well-  
45  
46 being during unemployment: A meta-analytic study. *J Appl Psychol* 2005;**90**:53-76.
- 47  
48  
49 8 Brenner H, Ahern W. Sickness absence and early retirement on health grounds in the  
50  
51 construction industry in Ireland. *Occup Environ Med* 2000;**57**:615-20.
- 52  
53  
54  
55  
56  
57  
58  
59  
60

- 1  
2  
3 9 Mauno S, De Cuyper N, Kinnunen U, *et al.* Work characteristics in long-term  
4  
5 temporary workers and temporary-to-permanent workers: A prospective study among Finnish  
6  
7 health care personnel. *Econ Ind Democracy* 2012;**33**:357-77.  
8  
9  
10 10 Waenerlund AK, Virtanen P, Hammarström A. Is temporary employment related to  
11  
12 health status? Analysis of the Northern Swedish Cohort. *Scand J Public Health* 2011;**39**:533-  
13  
14 9.  
15  
16 11 Waenerlund A-K. Temporary employment and illness. *Department of Public Health*  
17  
18 *and Clinical medicine*. Umeå: Umeå University 2013.  
19  
20  
21 12 Aronsson G, Dallner M, Lindh T, *et al.* Flexible pay but fixed expenses: Personal  
22  
23 financial strain among on-call employees. *Int J Health Serv* 2005;**35**:499-28.  
24  
25 13 Parker SK, Griffin MA, Sprigg CA, *et al.* Effect of temporary contracts on perceived  
26  
27 work characteristics and job strain: A longitudinal study. *Pers Psychol* 2002;**55**:689-719.  
28  
29 14 Ferrie JE, Westerlund H, Virtanen M, *et al.* Flexible labor markets and employee  
30  
31 health. *Scand J Work Environ Health* 2008:98-10.  
32  
33  
34 15 Kim MH, Kim CY, Park JK, *et al.* Is precarious employment damaging to self-rated  
35  
36 health? Results of propensity score matching methods, using longitudinal data in South  
37  
38 Korea. *Soc Sci Med* 2008;**67**:1982-94.  
39  
40  
41 16 Virtanen P, Vahtera J, Kivimaki M, *et al.* Employment security and health. *J*  
42  
43 *Epidemiol Community Health* 2002;**56**:569-74.  
44  
45 17 Virtanen P, Liukkonen V, Vahtera J, *et al.* Health inequalities in the workforce: the  
46  
47 labour market core-periphery structure. *Int J Epidemiol* 2003;**32**:1015-21.  
48  
49  
50 18 Bardasi E, Francesconi M. The impact of atypical employment on individual  
51  
52 wellbeing: evidence from a panel of British workers. *Soc Sci Med* 2004;**58**:1671-88.  
53  
54 19 Virtanen P, Vahtera J, Kivimaki M, *et al.* Labor market trajectories and health: a four-  
55  
56 year follow-up study of initially fixed-term employees. *Am J Epidemiol* 2005;**161**:840-46.  
57  
58  
59  
60

- 1  
2  
3 20 Waenerlund AK, Gustafsson PE, Virtanen P, *et al.* Is the core-periphery labour market  
4 structure related to perceived health? findings of the Northern Swedish Cohort. *BMC Public*  
5 *Health* 2011;**11**:10.  
6  
7  
8  
9  
10 21 Broughton A, Biletta I, Kullander M. Flexible forms of work: 'very atypical'  
11 contractual arrangements. European Foundation for the Improvement of Living and Working  
12 Conditions 2010.  
13  
14  
15  
16 22 Liukkonen V, Virtanen P, Vahtera J, *et al.* Employment trajectories and changes in  
17 sense of coherence. *Eur J Public Health* 2010;**20**:293-8.  
18  
19  
20  
21 23 Nagin DS. Analyzing developmental trajectories: A semiparametric, group-based  
22 approach. *Psychol Methods* 1999;**4**:139-57.  
23  
24  
25 24 Hammarström A, Janlert U. Cohort Profile: The Northern Swedish Cohort. *Int J*  
26 *Epidemiol* 2011.  
27  
28  
29  
30 25 Jones SRG, Riddell WC. Unemployment and nonemployment: Heterogeneities in  
31 labor market states. *Rev Econ Stat* 2006;**88**:314-23.  
32  
33  
34 26 Grzywacz JG, Dooley D. "Good jobs" to "bad jobs": replicated evidence of an  
35 employment continuum from two large surveys. *Soc Sci Med* 2003;**56**:1749-60.  
36  
37  
38 27 Furåker B, & Berglund, T. *Changes of Employer, Employment Protection and Labour*  
39 *Market Attachment: An Analysis of Swedish Data from 1972-1998*. Gothenburg: University of  
40 Gothenburg 2008.  
41  
42  
43  
44 28 Laux R. Measuring labour market attachment using the Labour Force Survey. *Labour*  
45 *market trends [1361-4819]* 1997;**105 (10)**:407 (8).  
46  
47  
48  
49 29 Rousseau D, ed. *Psychological contracts in organizations: Understanding written and*  
50 *unwritten agreements*. Thousand Oaks, CA: Sage 1995.  
51  
52  
53  
54 30 Meyer J, Paunonen S., Gellatly I., & Goffin R. . Organizational commitment and job  
55 performance: It's the nature of commitment that counts. *J Appl Psychol* 1989;**74**:152-6.  
56  
57  
58  
59  
60

- 1  
2  
3 31 Greenhalgh L, Rosenblatt Z. Job insecurity: Toward conceptual clarity. *Acad Manage*  
4  
5 *Rev* 1984;**9**:438-48.  
6  
7 32 Aronsson G, Gustafsson K, Dallner M. Forms of employment, work environment and  
8 health in to a centre - periphery perspective. *Arbete och Hälsa (Work and Health)*. Stockholm:  
9 National Institute for Working Life 2000.  
10  
11  
12  
13 33 Statistics Sweden. Undersökning om levnadsförhållande [In English: Survey of living  
14 conditions]. Stockholm: Statistics Sweden 1980.  
15  
16  
17  
18 34 Hammarström A, Virtanen P, Janlert U. Are the health consequences of temporary  
19 employment worse among low educated than among high educated? *Eur J Public Health*  
20 2010.  
21  
22  
23  
24  
25 35 Siegrist J, Marmot M. Health inequalities and the psychosocial environment - two  
26 scientific challenges. *Soc Sci Med* 2004;**58**:1463-73.  
27  
28  
29 36 Black D, Morris JN, Townsend P, *et al*. Inequalities in Health. Report of a research  
30 working group. London: Department of Health and Social Security 1980.  
31  
32  
33  
34 37 Marmot M, Allen J, Goldblatt P, *et al*. Fair society, healthy lives: Strategic review of  
35 health inequalities in England post-2010 (the Marmot review). London: UCL 2010.  
36  
37  
38 38 Lynch J, Kaplan G. Socioeconomic Position. In: Berkman LF, Kawachi I, eds. *Social*  
39 *Epidemiology*. New York: Oxford University Press 2000:13-35.  
40  
41  
42  
43 39 Artazcoz L, Benach J, Borrell C, *et al*. Social inequalities in the impact of flexible  
44 employment on different domains of psychosocial health. *J Epidemiol Community Health*  
45 2005;**59**:761-67.  
46  
47  
48  
49 40 Statistics Sweden. Socioekonomisk indelning (SEI). Meddelande i samordningsfrågor  
50 1982:4 (Swedish Socioeconomic Classification). Stockholm: Statistics Sweden 1983.  
51  
52  
53  
54 41 Golsch K. Employment flexibility in Spain and its impact on transitions to adulthood.  
55 *Work Employ Soc* 2003;**17**:691-718.  
56  
57  
58  
59  
60

- 1  
2  
3 42 Waldron I, Weiss CC, Hughes ME. Interacting effects of multiple roles on women's  
4 health. *J Health Soc Behav* 1998;**39**:216-36.  
5  
6  
7 43 Aronsson G, Gustafsson K, Dallner M. Work environment and health in different  
8 types of temporary jobs. *Eur J Work Organ Psy* 2002;**11**:151-75.  
9  
10  
11 44 Vives A, Amable M, Ferrer M, *et al.* Employment Precariousness and Poor Mental  
12 Health: Evidence from Spain on a New Social Determinant of Health. *Journal of*  
13 *Environmental and Public Health [Epub 2013 Feb 3]* In press.  
14  
15  
16  
17  
18 45 Muthén B, & Muthén, L. . Integrating person-centered and variable-centered analyses:  
19 Growth mixture modeling with latent trajectory classes. *Alcohol Clin Exp Res* 2000;**24**:882-  
20  
21  
22  
23 91.  
24  
25 46 Tolvanen A. Latent growth mixture modelling: A simulation study. *Department of*  
26 *Mathematics and Statistics*. Finland: University of Jyväskylä 2007.  
27  
28  
29 47 Cockx B, Picchio M. Are Short-lived Jobs Stepping Stones to Long-Lasting Jobs? *Oxf*  
30 *Bull Econ Stat* 2012;**74**:646-75.  
31  
32  
33  
34 48 Statistics Sweden. Women and men in Sweden 2012. Örebro: Statistics Sweden 2012.  
35  
36 49 Mirowsky J, Ross C. *Social Causes of Psychological Distress*. New York: Aldine De  
37 Gruyter 2003.  
38  
39  
40 50 Strully KW. Job loss and health in the US labour market. *Demography* 2009;**46**:221-  
41  
42  
43 46.  
44  
45 51 Bartley M. Unemployment and Ill Health - Understanding the Relationship. *J*  
46 *Epidemiol Community Health* 1994;**48**:333-7.  
47  
48  
49 52 Ferrie JE. Is job insecurity harmful to health? *J R Soc Med* 2001;**94**:71-6.  
50  
51 53 Tompa E, Scott-Marshall H, Dolinschi R, *et al.* Precarious employment experiences  
52 and their health consequences: towards a  
53  
54  
55  
56 theoretical framework. *Work* 2007;**28**:209-24.  
57  
58  
59  
60

- 1  
2  
3 54 Facey ME, Eakin JM. Contingent work and ill-health: Conceptualizing the links. *Soc*  
4  
5 *Theory Health*;8:326-49.  
6  
7 55 Jung T, Wickrama KAS. An Introduction to Latent Class Growth Analysis and  
8  
9 Growth Mixture Modeling. *Social and Personality Psychology Compass* 2008;2:302-17.  
10  
11 56 Hynes K, Clarkberg M. Women's employment patterns during early parenthood: A  
12  
13 group-based trajectory analysis. *J Marriage Fam* 2005;67:222-39.  
14  
15 57 Guest DE, Isaksson K, De Witte H, eds. *Employment contracts, psychological*  
16  
17 *contracts, and worker well-being: an international study*. Oxford: Oxford University Press  
18  
19 2010.  
20  
21 58 Kim IH, Muntaner C, Shahidi FV, *et al*. Welfare states, flexible employment, and  
22  
23 health: A critical review. *Health Policy* 2012;104:99-127.  
24  
25 59 TCO. Additional comment from TCO regarding infringement procedure 2007/4835  
26  
27 against Sweden. Stockholm The Swedish Confederation for professional employees  
28  
29 [http://www.tco.se/Documents/Additionalcomments.pdf] 2013.  
30  
31 60 Weitoft GR, Rosén M. Is perceived nervousness and anxiety a predictor of premature  
32  
33 mortality and severe morbidity? A longitudinal follow up of the Swedish survey of living  
34  
35 conditions. *J Epidemiol Community Health* 2005;59:794-8.  
36  
37 61 Idler EL, Benyamini Y. Self-rated health and mortality: a review of twenty-seven  
38  
39 community studies. *J Health Soc Behav* 1997;38:21-37.  
40  
41 62 Wärneryd B, Thorslund M, Östlin P. The quality of retrospective questions about  
42  
43 occupational history--a comparison between survey and census data. *Scand J Soc Med*  
44  
45 1991;19:7-13.  
46  
47  
48  
49  
50  
51  
52  
53  
54  
55  
56  
57  
58  
59  
60

1  
2  
3  
4 Figure 1. The number of cohort members clustered by trajectory analysis into eight tracks  
5  
6 (curves based on means of the attachment at the time points).  
7

8 Figure 2. Collapsed tracks of labour market attachment history. Permanent, high level,  
9  
10 strengthening and poor attachment.  
11  
12  
13  
14  
15  
16  
17  
18  
19  
20  
21  
22  
23  
24  
25  
26  
27  
28  
29  
30  
31  
32  
33  
34  
35  
36  
37  
38  
39  
40  
41  
42  
43  
44  
45  
46  
47  
48  
49  
50  
51  
52  
53  
54  
55  
56  
57  
58  
59  
60

For peer review only

1  
2  
3  
4  
5  
6  
7  
8  
9  
10  
11  
12  
13  
14  
15  
16  
17  
18  
19  
20  
21  
22  
23  
24  
25  
26  
27  
28  
29  
30  
31  
32  
33  
34  
35  
36  
37  
38  
39  
40  
41  
42  
43  
44  
45  
46  
47  
48  
49  
50  
51  
52  
53  
54  
55  
56  
57  
58  
59  
60



194x90mm (300 x 300 DPI)

er review only



1  
2  
3  
4  
5  
6  
7  
8  
9  
10  
11  
12  
13  
14  
15  
16  
17  
18  
19  
20  
21  
22  
23  
24  
25  
26  
27  
28  
29  
30  
31  
32  
33  
34  
35  
36  
37  
38  
39  
40  
41  
42  
43  
44  
45  
46  
47  
48  
49  
50  
51  
52  
53  
54  
55  
56  
57  
58  
59  
60

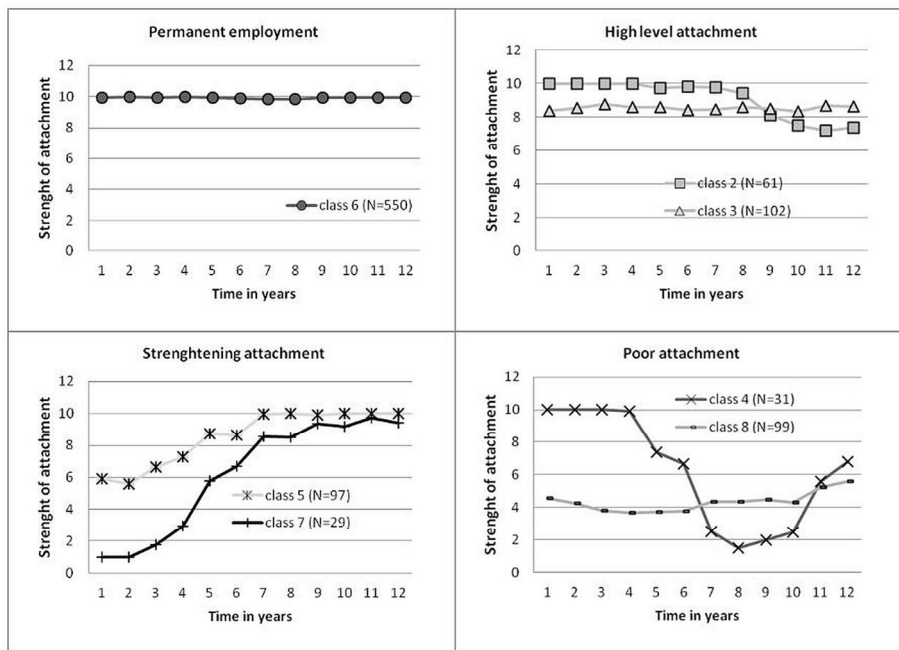

117x90mm (300 x 300 DPI)

Review only
